# Supplementary material for: A novel SUN1-ALLAN complex coordinates segregation of the bipartite MTOC across the nuclear envelope during rapid closed mitosis in Plasmodium berghei
Source: eLife. 2025 May 20;14:RP106537. doi: 10.7554/eLife.106537 (PMC12092005; doi:10.7554/eLife.106537)
Supplement: Figure 3—figure supplement 1—source data 3. [file elife-106537-fig3-figsupp1-data3.xlsx]

## Sheet: Sun1 KO-8 min_DEgenes
Gene_ID	Gene Name	baseMean	log2FoldChange	lfcSE	stat	pvalue	padj
PBANKA_1458800	N/A	8525.24	2.92857	0.192052	15.2489	1.68e-52	2.69e-49
PBANKA_1040581	N/A	54.8385	2.34103	0.552212	4.23936	2.24e-05	0.000877663		Upregulated	51
PBANKA_1000011	N/A	772.315	2.10757	0.248858	8.46897	2.48e-17	1.7e-14		Downregulated	31
PBANKA_1431000	CYP32	343.035	1.95466	0.28304	6.90595	4.99e-12	2.4e-09
PBANKA_0600351	Pb235	289.973	1.89046	0.296751	6.37051	1.88e-10	6.98e-08
PBANKA_0412000	DER1-2	29.2418	1.85174	0.680392	2.72158	0.00649708	0.0454796
PBANKA_1024600	LISP1	81.2057	1.69593	0.468023	3.62361	0.000290518	0.00540206
PBANKA_0216801	N/A	185.4	1.66333	0.334758	4.96877	6.74e-07	5.9e-05
PBANKA_1400091	Pb235	856.686	1.50963	0.241197	6.2589	3.88e-10	1.24e-07
PBANKA_0900900	Pb235	436.209	1.45307	0.250835	5.79294	6.92e-09	1.59e-06
PBANKA_1119500	N/A	121.671	1.39073	0.404014	3.44227	0.000576852	0.00868163
PBANKA_0902100	SLARP	358.794	1.36924	0.309142	4.42916	9.46e-06	0.000500645
PBANKA_0921900	N/A	237.459	1.3453	0.323832	4.15432	3.26e-05	0.00114653
PBANKA_1339500	N/A	1832.16	1.3313	0.19147	6.95304	3.58e-12	1.91e-09
PBANKA_1357000	N/A	91.4903	1.29342	0.440966	2.93316	0.00335536	0.0289707
PBANKA_1103600	ATPase3	78.4558	1.26852	0.454865	2.78878	0.00529078	0.039261
PBANKA_1202900	N/A	110.827	1.23094	0.408978	3.00979	0.00261428	0.0244804
PBANKA_0916800	N/A	165.037	1.22141	0.330623	3.69427	0.000220516	0.00453848
PBANKA_1202500	N/A	982.081	1.17916	0.231184	5.10051	3.39e-07	3.2e-05
PBANKA_0212200	N/A	2534.63	1.16632	0.207658	5.61653	1.95e-08	3.32e-06
PBANKA_0416100	MG1	24194.9	1.1504	0.214222	5.37016	7.87e-08	1.08e-05
PBANKA_1135900	N/A	1464.15	1.14119	0.232377	4.91096	9.06e-07	7.53e-05
PBANKA_0316600	Pb235	671.788	1.13695	0.245255	4.63579	3.56e-06	0.000214059
PBANKA_1012600	N/A	235.646	1.12095	0.308298	3.63594	0.000276964	0.00525142
PBANKA_0107600	NUP637	2156.73	1.11214	0.194324	5.72311	1.05e-08	2.19e-06
PBANKA_0601200	N/A	10344.8	1.1105	0.197295	5.6286	1.82e-08	3.32e-06
PBANKA_1356800	N/A	7836.7	1.10734	0.202615	5.46524	4.62e-08	6.75e-06
PBANKA_1308000	N/A	19309.4	1.10689	0.210658	5.25448	1.48e-07	1.79e-05
PBANKA_0807700	EG5	2985.65	1.10254	0.206438	5.3408	9.25e-08	1.17e-05
PBANKA_0925400	N/A	19599.5	1.09722	0.210216	5.21948	1.79e-07	2.05e-05
PBANKA_0507300	N/A	18269.3	1.09426	0.198838	5.50328	3.73e-08	5.61e-06
PBANKA_1340500	N/A	2139.34	1.08807	0.197508	5.50898	3.61e-08	5.61e-06
PBANKA_1119600	MSP10	371.934	1.08691	0.283153	3.83859	0.000123743	0.0029686
PBANKA_0306100	P230	4277.88	1.08256	0.24994	4.33127	1.48e-05	0.000706907
PBANKA_0934600	N/A	1233.36	1.08144	0.247735	4.3653	1.27e-05	0.000630293
PBANKA_1329200	N/A	18357.1	1.07755	0.202835	5.31245	1.08e-07	1.34e-05
PBANKA_1111000	N/A	6455.8	1.07262	0.181557	5.90788	3.47e-09	9.82e-07
PBANKA_1123500	ISWI	19124.4	1.06373	0.236327	4.5011	6.76e-06	0.000378577
PBANKA_1344800	N/A	169.942	1.05685	0.346053	3.05402	0.00225794	0.0222506
PBANKA_1454200	N/A	19026.8	1.05142	0.192955	5.44907	5.06e-08	7.17e-06
PBANKA_0707700	N/A	2392.37	1.04723	0.245523	4.2653	2e-05	0.00082174
PBANKA_1302000	N/A	2919.44	1.04561	0.200577	5.21302	1.86e-07	2.05e-05
PBANKA_0823700	N/A	1662.64	1.03395	0.192932	5.35913	8.36e-08	1.09e-05
PBANKA_0106500	N/A	364.255	1.03255	0.283461	3.64265	0.000269848	0.00517764
PBANKA_1203300	N/A	119.124	1.0271	0.360428	2.84965	0.00437667	0.0347584
PBANKA_1326700	N/A	1341.67	1.01376	0.199418	5.08359	3.7e-07	3.39e-05
PBANKA_0505900	N/A	4163.06	1.01114	0.181176	5.58099	2.39e-08	3.84e-06
PBANKA_1342100	N/A	163.658	1.00942	0.334801	3.01498	0.00256997	0.0242686
PBANKA_1443100	N/A	473.356	1.00722	0.312969	3.21828	0.0012896	0.01503
PBANKA_1029000	N/A	2017.63	1.0065	0.24237	4.15273	3.29e-05	0.00114653
PBANKA_0615700	N/A	8081.47	1.00133	0.19538	5.12504	2.97e-07	2.92e-05
PBANKA_1412200	N/A	2139.84	0.994997	0.205174	4.84953	1.24e-06	9.77e-05
PBANKA_1442000	K1	444.446	0.987913	0.24626	4.01167	6.03e-05	0.00170804
PBANKA_1463000	G377	37994.3	0.986834	0.203878	4.84032	1.3e-06	0.000100694
PBANKA_0720100	N/A	7258.73	0.986634	0.196908	5.01064	5.42e-07	4.84e-05
PBANKA_0309400	NUP434	1873.1	0.986423	0.204654	4.81995	1.44e-06	0.000106394
PBANKA_1126800	HECT1	42939.5	0.985302	0.175575	5.61185	2e-08	3.32e-06
PBANKA_1411500	N/A	325.524	0.983749	0.268597	3.66255	0.000249717	0.00493699
PBANKA_1122700	TKL4	3909	0.971605	0.197008	4.93181	8.15e-07	6.88e-05
PBANKA_0802000	N/A	1090.99	0.961698	0.223473	4.30342	1.68e-05	0.000756963
PBANKA_1035600	ClpC	1718.09	0.956904	0.282386	3.38864	0.000702395	0.00996774
PBANKA_0716100	N/A	464.054	0.953939	0.259439	3.67693	0.000236055	0.00477466
PBANKA_0521700	ApiAP2	3872.35	0.953823	0.203677	4.68303	2.83e-06	0.000183694
PBANKA_1321600	N/A	5016.6	0.95227	0.197813	4.81399	1.48e-06	0.00010782
PBANKA_1104600	N/A	823.619	0.950821	0.23068	4.12181	3.76e-05	0.00129313
PBANKA_1118500	N/A	5544.69	0.945595	0.220218	4.2939	1.76e-05	0.000775351
PBANKA_0406200	N/A	4947.91	0.944863	0.228748	4.13059	3.62e-05	0.00125367
PBANKA_0621200	N/A	550.672	0.932947	0.237493	3.92832	8.55e-05	0.00223898
PBANKA_0704500	HEUL	9706.94	0.926807	0.180602	5.13175	2.87e-07	2.88e-05
PBANKA_0719500	N/A	4433.12	0.926155	0.198266	4.67128	2.99e-06	0.000186892
PBANKA_1106900	PIMMS2	156.988	0.923808	0.327182	2.82353	0.00474974	0.0362516
PBANKA_1237100	N/A	18384.2	0.917266	0.19181	4.78216	1.73e-06	0.000119312
PBANKA_0522100	N/A	4162.67	0.913569	0.206025	4.43427	9.24e-06	0.000494371
PBANKA_1359300	N/A	3499.17	0.9124	0.211496	4.31404	1.6e-05	0.000739532
PBANKA_1341700	N/A	2617.38	0.91075	0.193485	4.70709	2.51e-06	0.000165774
PBANKA_1220600	N/A	2694.71	0.901711	0.188391	4.78637	1.7e-06	0.000118533
PBANKA_1011500	PHD2	4511.92	0.900386	0.195598	4.60324	4.16e-06	0.000247319
PBANKA_1222700	N/A	569.528	0.895346	0.234126	3.8242	0.000131197	0.00312794
PBANKA_1427800	N/A	4364.18	0.894817	0.215374	4.15471	3.26e-05	0.00114653
PBANKA_0906700	N/A	2917.55	0.89271	0.199718	4.46987	7.83e-06	0.000428344
PBANKA_1443800	MRP2	1802.11	0.891901	0.207807	4.29197	1.77e-05	0.000775351
PBANKA_0912600	N/A	8493.68	0.888602	0.207783	4.27658	1.9e-05	0.000814662
PBANKA_1335100	N/A	3451.49	0.886881	0.183562	4.8315	1.36e-06	0.000101969
PBANKA_1104400	N/A	5887.72	0.88354	0.183641	4.81124	1.5e-06	0.00010782
PBANKA_1339200	N/A	185.414	0.881866	0.309497	2.84935	0.00438089	0.0347584
PBANKA_1010900	N/A	1743.73	0.880822	0.207098	4.25317	2.11e-05	0.000838863
PBANKA_1032200	N/A	4137.11	0.875608	0.187181	4.67786	2.9e-06	0.000183694
PBANKA_1245800	N/A	1055.37	0.875155	0.227404	3.84847	0.00011886	0.00289106
PBANKA_0307400	N/A	833.215	0.871534	0.216552	4.02459	5.71e-05	0.00169672
PBANKA_1128500	N/A	6949.18	0.868177	0.197227	4.40191	1.07e-05	0.000549746
PBANKA_0822500	N/A	1385.62	0.865292	0.210876	4.10331	4.07e-05	0.00131641
PBANKA_0702500	N/A	1408.8	0.864919	0.215958	4.00503	6.2e-05	0.00172593
PBANKA_0811400	N/A	7330.96	0.859416	0.223906	3.83828	0.000123897	0.0029686
PBANKA_0315300	N/A	1874.62	0.859395	0.199268	4.31275	1.61e-05	0.000739532
PBANKA_0722000	N/A	3629.6	0.856696	0.187826	4.56112	5.09e-06	0.000290301
PBANKA_0604900	N/A	930.404	0.855094	0.209964	4.07258	4.65e-05	0.00145083
PBANKA_1134300	N/A	1685.58	0.853871	0.203986	4.18594	2.84e-05	0.00105208
PBANKA_1412600	TERT	1237.86	0.853862	0.213475	3.99983	6.34e-05	0.00174444
PBANKA_1030200	N/A	1206.77	0.847716	0.235406	3.60108	0.000316901	0.00578104
PBANKA_1142300	RHOP148	691.776	0.846773	0.225061	3.76241	0.000168285	0.00366724
PBANKA_1104700	TRS85	909.632	0.845463	0.210418	4.01801	5.87e-05	0.00170026
PBANKA_1301800	N/A	8521.04	0.842182	0.207589	4.05697	4.97e-05	0.00151533
PBANKA_1448800	N/A	1246.69	0.841832	0.220403	3.81952	0.000133713	0.00317222
PBANKA_1118700	ACS12	273.116	0.841745	0.300165	2.80427	0.00504305	0.0378307
PBANKA_1226100	N/A	8607.77	0.83924	0.19009	4.41497	1.01e-05	0.000523154
PBANKA_1218100	Cap380	478.723	0.835422	0.254716	3.27981	0.00103875	0.0129939
PBANKA_1420500	N/A	6877.76	0.834126	0.211223	3.94903	7.85e-05	0.00208298
PBANKA_1025500	NOT1	9629.49	0.833042	0.195626	4.25834	2.06e-05	0.000832837
PBANKA_0522900	BRR2	2319.98	0.829383	0.194725	4.25925	2.05e-05	0.000832837
PBANKA_0406100	N/A	764.995	0.827998	0.248005	3.33863	0.000841917	0.0114216
PBANKA_1117200	N/A	319.424	0.823961	0.265304	3.10573	0.00189811	0.0194496
PBANKA_0108000	CLS	312.011	0.822657	0.28954	2.84126	0.00449358	0.0354191
PBANKA_1038700	N/A	3731.88	0.819613	0.253557	3.23246	0.00122729	0.0144869
PBANKA_0522600	N/A	6477.55	0.816433	0.189617	4.3057	1.66e-05	0.000756283
PBANKA_1026100	N/A	1819.35	0.813486	0.199796	4.07159	4.67e-05	0.00145083
PBANKA_1121800	AP2-SP3	1255.31	0.812621	0.201109	4.0407	5.33e-05	0.00160974
PBANKA_0826900	N/A	5832.95	0.812257	0.194165	4.18334	2.87e-05	0.00105604
PBANKA_0606700	CRMP3	560.991	0.812007	0.265448	3.059	0.00222076	0.0219613
PBANKA_0112200	MyoE	1353.15	0.80929	0.23504	3.4432	0.000574872	0.00867895
PBANKA_0404000	N/A	2214.8	0.807879	0.196404	4.11336	3.9e-05	0.00131327
PBANKA_1015300	N/A	912.407	0.806654	0.207381	3.88972	0.000100361	0.00254389
PBANKA_1362300	N/A	2313.92	0.805616	0.190585	4.22707	2.37e-05	0.000912154
PBANKA_1439600	N/A	1972.29	0.801995	0.197172	4.06748	4.75e-05	0.00146715
PBANKA_1129100	N/A	6170.81	0.801205	0.218965	3.65905	0.00025315	0.00495061
PBANKA_1102900	CDC6	3388.58	0.799023	0.214895	3.71821	0.000200641	0.00420126
PBANKA_0924200	BDCP	256.341	0.797853	0.283369	2.81559	0.00486871	0.0368096
PBANKA_0414700	N/A	1857.2	0.797355	0.203064	3.92662	8.61e-05	0.00224266
PBANKA_1005200	N/A	300.087	0.794005	0.269126	2.95031	0.00317459	0.0279723
PBANKA_0917300	N/A	292.439	0.793115	0.281539	2.81707	0.00484634	0.0366981
PBANKA_1448200	N/A	6790.4	0.792182	0.192363	4.11817	3.82e-05	0.00129523
PBANKA_0509700	N/A	4700.63	0.789471	0.189867	4.15802	3.21e-05	0.00114653
PBANKA_1229300	N/A	687.004	0.789019	0.226823	3.47856	0.000504116	0.00785703
PBANKA_1106100	N/A	10759.5	0.786859	0.183087	4.29773	1.73e-05	0.000769481
PBANKA_1356000	ApiAP2	1487.84	0.785163	0.202246	3.88222	0.000103508	0.00259633
PBANKA_0102900	SIP2	4357.3	0.784435	0.183578	4.27302	1.93e-05	0.000814662
PBANKA_1025300	EPAC	2236.59	0.783966	0.198203	3.95536	7.64e-05	0.00204864
PBANKA_0415300	RNaseII	1266.35	0.782947	0.22013	3.55675	0.000375469	0.00634476
PBANKA_1135300	N/A	806.467	0.782666	0.224643	3.48405	0.000493886	0.00774773
PBANKA_1341800	N/A	5321.36	0.781441	0.194994	4.00752	6.14e-05	0.0017181
PBANKA_1002400	DPAP3	668.909	0.780947	0.237254	3.29161	0.00099615	0.0126582
PBANKA_1112900	N/A	922.524	0.779727	0.218159	3.57412	0.000351411	0.00617663
PBANKA_1218800	ABCI3	1583.79	0.77788	0.207912	3.7414	0.000183	0.00393449
PBANKA_1230700	N/A	369.515	0.777059	0.277596	2.79924	0.00512231	0.0383655
PBANKA_1402300	N/A	3913.02	0.774189	0.184446	4.19739	2.7e-05	0.00101593
PBANKA_0617400	N/A	712.542	0.773793	0.243043	3.18377	0.0014537	0.0162436
PBANKA_0618800	DDX31	339.896	0.773186	0.267651	2.88879	0.00386733	0.0319098
PBANKA_1119000	N/A	399.801	0.771592	0.245279	3.14578	0.00165646	0.017807
PBANKA_0720700	N/A	557.436	0.771374	0.235386	3.27707	0.00104892	0.0130532
PBANKA_1011100	N/A	4103.17	0.767709	0.192226	3.99379	6.5e-05	0.0017793
PBANKA_1401000	N/A	5392.5	0.766666	0.216089	3.54792	0.000388285	0.00647053
PBANKA_1140300	N/A	4264.85	0.764629	0.221366	3.45413	0.000552067	0.00844049
PBANKA_0301900	N/A	1882.98	0.761844	0.216073	3.52587	0.0004221	0.00683447
PBANKA_0834300	N/A	2324.4	0.761835	0.225806	3.37384	0.000741268	0.010408
PBANKA_0413000	N/A	1933.18	0.760838	0.203903	3.73138	0.000190435	0.00405812
PBANKA_1312100	N/A	2585.26	0.760781	0.186098	4.08806	4.35e-05	0.00137355
PBANKA_0205800	eIK2	27641.9	0.760773	0.189344	4.01794	5.87e-05	0.00170026
PBANKA_0104800	N/A	1709.09	0.759618	0.196576	3.86424	0.000111437	0.00274401
PBANKA_1334000	N/A	1447.06	0.75902	0.219209	3.46254	0.000535097	0.00823332
PBANKA_1431400	N/A	15554.1	0.758968	0.227865	3.33078	0.000866025	0.0116312
PBANKA_1245500	N/A	3622.86	0.757759	0.184575	4.10542	4.04e-05	0.00131641
PBANKA_0313600	N/A	2446.65	0.757527	0.206067	3.67611	0.000236814	0.00477466
PBANKA_1340900	N/A	594.91	0.75515	0.227261	3.32283	0.000891085	0.0118784
PBANKA_1124300	N/A	629.344	0.753744	0.237695	3.17105	0.00151888	0.0167007
PBANKA_0305400	N/A	399.171	0.752851	0.265251	2.83825	0.00453612	0.0355964
PBANKA_1327900	N/A	4269.99	0.751689	0.183765	4.09049	4.3e-05	0.00137289
PBANKA_0615800	EST	9753.74	0.750061	0.204786	3.66266	0.000249608	0.00493699
PBANKA_0935500	N/A	6476.47	0.749943	0.200302	3.74407	0.000181065	0.00391593
PBANKA_1136100	N/A	4922.37	0.748459	0.222082	3.37018	0.000751183	0.0104858
PBANKA_1038200	MISFIT	9598.54	0.746492	0.229935	3.24654	0.00116818	0.0140298
PBANKA_0521500	N/A	823.861	0.746235	0.212851	3.5059	0.000455061	0.00725687
PBANKA_1001000	N/A	1399.22	0.745832	0.196419	3.79715	0.000146367	0.00332502
PBANKA_1333300	N/A	1184.04	0.745588	0.207828	3.58753	0.00033383	0.00599898
PBANKA_0910800	N/A	2457.59	0.744442	0.231574	3.2147	0.00130582	0.0151256
PBANKA_0619700	RALP1	287.889	0.74434	0.272285	2.73368	0.00626312	0.0441716
PBANKA_1406900	N/A	7122.67	0.744156	0.205039	3.62933	0.000284154	0.00532485
PBANKA_0942600	N/A	1455.07	0.742912	0.23243	3.19628	0.0013921	0.0156976
PBANKA_1219800	MED14	416.451	0.739375	0.250065	2.95673	0.00310915	0.0276778
PBANKA_0403600	N/A	9971.43	0.734442	0.199796	3.67597	0.000236948	0.00477466
PBANKA_0303000	N/A	1502.87	0.733733	0.224205	3.2726	0.00106564	0.0132271
PBANKA_0313900	N/A	750.395	0.731601	0.233672	3.13089	0.00174278	0.0183897
PBANKA_0418000	DDX60	2259.24	0.730936	0.191852	3.80989	0.000139029	0.00325031
PBANKA_1226700	N/A	1372.76	0.73065	0.220688	3.31078	0.000930361	0.0122421
PBANKA_0917500	SMC1	8355.77	0.730339	0.191875	3.80632	0.000141048	0.00326721
PBANKA_0801600	N/A	1801.77	0.72971	0.21657	3.36939	0.000753339	0.0104858
PBANKA_0210500	N/A	1274.58	0.729588	0.198742	3.67104	0.000241567	0.00484745
PBANKA_0411950	N/A	1297.56	0.727393	0.217326	3.34701	0.00081687	0.0112527
PBANKA_0309200	NUP390	1293.7	0.725537	0.200547	3.6178	0.000297123	0.00550363
PBANKA_1129900	N/A	1715.69	0.723464	0.200182	3.61403	0.000301479	0.0055417
PBANKA_1121700	N/A	4723.12	0.7217	0.186915	3.86111	0.000112875	0.00275943
PBANKA_1321400	UIS20	1224.05	0.72021	0.214753	3.35367	0.000797474	0.0110681
PBANKA_1324200	N/A	483.243	0.719346	0.237969	3.02286	0.00250399	0.0237386
PBANKA_1361600	N/A	7023.69	0.719283	0.198337	3.62656	0.00028722	0.00536144
PBANKA_1102200	MSP8	1645.83	0.716315	0.201686	3.55163	0.000382848	0.00644684
PBANKA_1341000	N/A	5703.97	0.714766	0.182913	3.90769	9.32e-05	0.00238705
PBANKA_0408300	N/A	10717.2	0.7144	0.18094	3.94827	7.87e-05	0.00208298
PBANKA_1216700	N/A	3838.68	0.714219	0.20974	3.40525	0.00066103	0.00956012
PBANKA_0827300	N/A	1956.34	0.712267	0.213167	3.34135	0.000833719	0.0113745
PBANKA_0622100	N/A	3185.77	0.712031	0.228185	3.12041	0.00180599	0.0188669
PBANKA_1309000	MAK5	472.009	0.71079	0.245222	2.89855	0.00374889	0.031267
PBANKA_1019900	N/A	683.178	0.709668	0.221102	3.20968	0.00132881	0.015237
PBANKA_0910300	GCalpha	4358.06	0.708703	0.190377	3.72263	0.000197158	0.00416454
PBANKA_1033800	N/A	6089.95	0.70551	0.194022	3.63625	0.000276641	0.00525142
PBANKA_0906900	N/A	9533.83	0.702618	0.192171	3.65622	0.00025596	0.00495061
PBANKA_0313400	ATG11	2276.71	0.702127	0.213042	3.29572	0.000981696	0.0125741
PBANKA_0942300	N/A	2564.47	0.700841	0.209333	3.34797	0.000814062	0.0112527
PBANKA_1331200	N/A	4224.49	0.698546	0.196068	3.56277	0.000366966	0.00632603
PBANKA_1321100	N/A	1549.65	0.697654	0.196492	3.55054	0.000384445	0.00645118
PBANKA_1206300	PHD1	5598.72	0.696613	0.191843	3.63116	0.000282146	0.00532485
PBANKA_0801700	N/A	1067.19	0.695998	0.211119	3.29671	0.000978253	0.0125634
PBANKA_1031100	PREX	897.118	0.695498	0.219165	3.17341	0.00150661	0.0166341
PBANKA_0104400	N/A	2890.56	0.694796	0.216372	3.21112	0.00132218	0.015212
PBANKA_0213200	AKIT8	14803.2	0.693666	0.215575	3.21774	0.00129203	0.01503
PBANKA_0806700	N/A	5192.79	0.693303	0.183738	3.77333	0.000161082	0.00354233
PBANKA_0901100	N/A	1163.77	0.691915	0.212334	3.25861	0.00111958	0.0135816
PBANKA_1426200	CAF1	3035.06	0.6897	0.256895	2.68476	0.00725829	0.049724
PBANKA_0932800	N/A	1781.18	0.689694	0.197506	3.49202	0.000479386	0.00756958
PBANKA_1234300	CCR4-1	1968.88	0.689461	0.199934	3.44845	0.00056381	0.00856564
PBANKA_1322500	N/A	546.613	0.688521	0.23159	2.97302	0.00294886	0.026595
PBANKA_0305500	N/A	471.195	0.688492	0.250069	2.75321	0.00590146	0.0426109
PBANKA_1313400	RRP6	1114.32	0.687302	0.21238	3.23619	0.00121137	0.014422
PBANKA_0504800	N/A	3762.46	0.686743	0.187801	3.65675	0.00025543	0.00495061
PBANKA_0803200	N/A	5224.16	0.685631	0.189977	3.60903	0.000307347	0.00562808
PBANKA_0210400	PMS1	9471.52	0.684177	0.213083	3.21084	0.00132347	0.015212
PBANKA_1332600	N/A	557.824	0.682183	0.249524	2.73394	0.00625819	0.0441716
PBANKA_0513400	CDC50C	390.558	0.678604	0.248244	2.73361	0.00626437	0.0441716
PBANKA_1327700	N/A	1364.56	0.678369	0.232217	2.92128	0.00348601	0.0296642
PBANKA_0307100	N/A	9294.99	0.676811	0.202649	3.33981	0.000838351	0.0114054
PBANKA_0208900	N/A	912.319	0.67617	0.228876	2.95431	0.00313371	0.0277769
PBANKA_0521300	N/A	4822.47	0.674512	0.184582	3.65428	0.000257909	0.00496836
PBANKA_0911000	N/A	3369.66	0.672824	0.224671	2.99471	0.00274703	0.0253442
PBANKA_1035700	WDR65	4049.52	0.672621	0.222035	3.02934	0.00245085	0.0234759
PBANKA_0914200	N/A	1360.54	0.672543	0.203038	3.3124	0.000924978	0.0122046
PBANKA_1228400	N/A	1256.59	0.672184	0.198002	3.39483	0.000686714	0.00987228
PBANKA_1450400	N/A	4403.82	0.671788	0.189281	3.54915	0.000386476	0.00646273
PBANKA_0913000	CAPD3	5389.87	0.666722	0.228455	2.9184	0.00351838	0.0297795
PBANKA_0416200	N/A	1544.05	0.666497	0.203869	3.26924	0.00107836	0.0132596
PBANKA_1361200	N/A	40298	0.663628	0.180049	3.68581	0.000227979	0.00465231
PBANKA_0622200	BDP6	1599.61	0.661299	0.213583	3.09621	0.00196012	0.0199999
PBANKA_1025100	N/A	7307.65	0.660589	0.198206	3.33283	0.000859663	0.0116296
PBANKA_0401700	N/A	1332.53	0.660033	0.20191	3.26895	0.00107946	0.0132596
PBANKA_0310500	N/A	2745.59	0.660031	0.192326	3.43183	0.000599529	0.00891151
PBANKA_0207600	N/A	8657.16	0.659828	0.185463	3.55773	0.000374074	0.00634345
PBANKA_1230100	N/A	12708.9	0.659498	0.186354	3.53896	0.000401712	0.0066712
PBANKA_0819800	gammaGCS	4876.23	0.659251	0.234497	2.81134	0.00493364	0.0371837
PBANKA_1405000	N/A	7447.89	0.659118	0.221304	2.97834	0.00289814	0.0262222
PBANKA_1457600	N/A	879.598	0.659046	0.209799	3.14132	0.00168188	0.0179599
PBANKA_0622600	N/A	772.112	0.657288	0.214558	3.06345	0.00218802	0.0216821
PBANKA_1447900	MD2	11967.5	0.657128	0.186083	3.53137	0.000413417	0.00677925
PBANKA_0308300	N/A	3723.17	0.654745	0.185624	3.52726	0.000419892	0.00683176
PBANKA_1215900	N/A	2374.37	0.650821	0.221263	2.9414	0.00326737	0.0285066
PBANKA_0908400	N/A	1194.35	0.649524	0.200815	3.23444	0.00121881	0.014422
PBANKA_1335400	HDA1	2286.93	0.649167	0.195507	3.32043	0.000898793	0.0119245
PBANKA_1344500	N/A	2107.14	0.647662	0.20977	3.08749	0.00201858	0.0205094
PBANKA_1140500	N/A	892.671	0.647294	0.221579	2.92127	0.00348606	0.0296642
PBANKA_0908500	MyoK	5554.19	0.646979	0.180496	3.58445	0.000337789	0.00600851
PBANKA_1231600	AP2-O2	9308.02	0.646677	0.190264	3.39885	0.000676696	0.00975739
PBANKA_1233400	WDR26	5409.52	0.645945	0.207189	3.11766	0.00182291	0.0188799
PBANKA_0818000	MOP	6315.35	0.645485	0.190559	3.38733	0.000705772	0.00996774
PBANKA_1447200	N/A	1171.99	0.645251	0.207495	3.10972	0.00187264	0.0192295
PBANKA_0909200	N/A	1321.1	0.64497	0.19757	3.26451	0.00109655	0.0133695
PBANKA_1362100	TKL3	2735.63	0.644815	0.190602	3.38305	0.00071686	0.0100947
PBANKA_1011200	N/A	1148.59	0.644365	0.20083	3.20851	0.00133427	0.0152632
PBANKA_1010300	N/A	6119.6	0.644224	0.188966	3.4092	0.00065154	0.00947981
PBANKA_0604500	HMGB3	5824.05	0.643143	0.187368	3.43252	0.000598005	0.00891151
PBANKA_0717200	N/A	6556.64	0.641724	0.185495	3.45952	0.000541142	0.00829981
PBANKA_0920400	N/A	2917.88	0.641418	0.184768	3.47148	0.000517604	0.00799955
PBANKA_1240000	SMC6	1786.13	0.640333	0.217099	2.9495	0.00318289	0.0279723
PBANKA_1435300	PRP17	1170.74	0.639496	0.201826	3.16855	0.00153202	0.0168069
PBANKA_1446500	N/A	2903.15	0.639474	0.193929	3.29747	0.000975599	0.0125634
PBANKA_1026500	MCA3	6176.94	0.639352	0.193863	3.29796	0.000973885	0.0125634
PBANKA_1306600	N/A	4473.12	0.638467	0.18083	3.53076	0.000414366	0.00677925
PBANKA_1420100	N/A	2381.29	0.637608	0.227925	2.79744	0.00515089	0.03846
PBANKA_1227600	ACbeta	863.604	0.637495	0.218244	2.92101	0.00348895	0.0296642
PBANKA_0410200	N/A	750.832	0.636972	0.213203	2.98763	0.00281145	0.0258368
PBANKA_1134500	N/A	639.838	0.634623	0.221647	2.86321	0.00419368	0.0335494
PBANKA_0802700	N/A	2054.98	0.633196	0.211302	2.99664	0.00272971	0.0252328
PBANKA_1233500	PUF1	8360.96	0.63272	0.206204	3.06842	0.00215191	0.0215555
PBANKA_1436200	SET10	4738.82	0.631717	0.222871	2.83445	0.00459044	0.0358257
PBANKA_1016400	MFS5	598.05	0.631143	0.223444	2.82461	0.00473383	0.0361875
PBANKA_1133100	ARK3	42041.1	0.630066	0.175134	3.59763	0.000321134	0.00581446
PBANKA_0304500	N/A	4510.62	0.629517	0.18334	3.4336	0.000595625	0.00890848
PBANKA_1126900	PK4	3260.98	0.62929	0.222603	2.82697	0.00469913	0.0361552
PBANKA_0108200	N/A	1466.53	0.624054	0.205149	3.04195	0.00235051	0.0228542
PBANKA_0831500	N/A	2176.28	0.621168	0.188799	3.2901	0.00100152	0.0126929
PBANKA_0927200	N/A	2073.5	0.620018	0.207915	2.98207	0.00286303	0.0260649
PBANKA_0942000	N/A	2912.78	0.618773	0.187883	3.2934	0.000989829	0.0126112
PBANKA_0939600	PAIP1	17863.5	0.616834	0.187777	3.28492	0.0010201	0.0128607
PBANKA_0909600	ApiAP2	8204	0.615221	0.188852	3.2577	0.0011232	0.0135913
PBANKA_1442200	SOC2	36636.9	0.615108	0.212506	2.89454	0.00379717	0.031584
PBANKA_1308400	eIK1	1493.76	0.611775	0.216256	2.82893	0.00467036	0.0361129
PBANKA_1108100	ND6	1132.17	0.611111	0.200786	3.04359	0.00233772	0.0228542
PBANKA_1138400	Pcalp	6352.82	0.610661	0.206761	2.95347	0.00314226	0.0277769
PBANKA_0713500	N/A	1958.13	0.609329	0.193911	3.14232	0.00167614	0.0179385
PBANKA_0834100	N/A	1792.28	0.608328	0.21082	2.88554	0.00390746	0.0320023
PBANKA_1243900	AKIT5	15063.8	0.608278	0.211076	2.8818	0.00395404	0.0321124
PBANKA_1448700	BDP5	4302.89	0.607995	0.186029	3.26828	0.00108203	0.0132596
PBANKA_1443500	N/A	3151.31	0.607808	0.211445	2.87455	0.0040461	0.0326947
PBANKA_0902300	FD2	6054.39	0.60519	0.188772	3.20593	0.00134626	0.0153276
PBANKA_0108400	N/A	1630.86	0.604403	0.202418	2.98592	0.00282724	0.0258368
PBANKA_0828000	GD1	9423.67	0.604156	0.180523	3.3467	0.000817784	0.0112527
PBANKA_1425400	N/A	996.541	0.602858	0.209039	2.88395	0.00392719	0.0320023
PBANKA_1444500	MyoJ	1991.26	0.602641	0.189539	3.17951	0.00147526	0.0164465
PBANKA_0910000	N/A	4387.37	0.602142	0.190627	3.15874	0.00158452	0.0172258
PBANKA_0815500	N/A	6703.51	0.600248	0.183461	3.2718	0.00106865	0.0132304
PBANKA_0901800	N/A	1180.83	0.598012	0.214236	2.79138	0.00524844	0.0390672
PBANKA_0929800	N/A	825.526	0.597098	0.210345	2.83866	0.00453031	0.0355964
PBANKA_1460500	N/A	1200.52	0.596512	0.216464	2.7557	0.00585662	0.0423506
PBANKA_0833900	N/A	2232.58	0.59492	0.19551	3.04291	0.00234301	0.0228542
PBANKA_1012300	N/A	1604.28	0.594743	0.193871	3.06773	0.00215692	0.0215555
PBANKA_1142100	N/A	1459.72	0.594721	0.195194	3.04683	0.00231271	0.0227307
PBANKA_0502800	N/A	5334.82	0.594505	0.179324	3.31526	0.000915565	0.0121136
PBANKA_1307500	N/A	2930.72	0.594433	0.210643	2.822	0.00477253	0.0363679
PBANKA_1140100	NUP205	1982.02	0.593618	0.206416	2.87584	0.00402957	0.0326708
PBANKA_0701200	N/A	3556.78	0.59306	0.190214	3.11785	0.00182176	0.0188799
PBANKA_1238900	N/A	2061.75	0.592409	0.213085	2.78015	0.00543331	0.0401331
PBANKA_0917100	SR1	1111.76	0.59222	0.218929	2.70508	0.00682877	0.0473199
PBANKA_1412000	N/A	2124.16	0.588403	0.189138	3.11097	0.00186473	0.0191892
PBANKA_0931900	N/A	2828.38	0.58619	0.186737	3.13911	0.00169459	0.0180158
PBANKA_1407400	DCP2	7986.15	0.585949	0.204523	2.86496	0.00417059	0.033476
PBANKA_1438400	N/A	7109.32	0.585829	0.187859	3.11845	0.00181804	0.0188799
PBANKA_1208200	N/A	16305.9	0.585808	0.206408	2.8381	0.00453824	0.0355964
PBANKA_0610100	LSD1	3997.76	0.585287	0.193299	3.02789	0.00246271	0.0234859
PBANKA_1017600	N/A	1744.37	0.583771	0.193622	3.015	0.00256976	0.0242686
PBANKA_1244700	N/A	1367.99	0.583183	0.198758	2.93414	0.00334474	0.0289707
PBANKA_0414000	N/A	1489.75	0.582923	0.198782	2.93248	0.00336268	0.0289707
PBANKA_1228100	ApiAP2	14778.2	0.580507	0.17903	3.24252	0.00118478	0.0141586
PBANKA_1349600	COG3	899.377	0.579468	0.207734	2.78947	0.00527945	0.0392374
PBANKA_0921800	N/A	778.215	0.577151	0.212326	2.71822	0.00656333	0.0458102
PBANKA_1303200	N/A	1833.91	0.576065	0.211594	2.7225	0.00647908	0.0454196
PBANKA_0606600	N/A	1746.88	0.573825	0.195795	2.93075	0.00338148	0.0290807
PBANKA_0901900	N/A	123489	0.572494	0.178133	3.21385	0.00130967	0.0151256
PBANKA_1108700	SMC4	33888.5	0.572115	0.196835	2.90658	0.00365406	0.030712
PBANKA_0621300	AKIT1	10064.5	0.570557	0.179756	3.17406	0.00150321	0.0166341
PBANKA_1440600	N/A	1324.88	0.569558	0.197419	2.88502	0.00391389	0.0320023
PBANKA_1023800	N/A	2186.65	0.568056	0.187687	3.02661	0.00247312	0.0234922
PBANKA_0813600	N/A	1891.83	0.566917	0.195477	2.90018	0.00372953	0.031183
PBANKA_0208800	UBP1	6609.69	0.566017	0.192417	2.94161	0.00326508	0.0285066
PBANKA_1005400	CINCH	2067.31	0.565882	0.196209	2.88407	0.00392566	0.0320023
PBANKA_0940200	DNA2	861.704	0.563758	0.209523	2.69067	0.00713096	0.0490245
PBANKA_1464500	DRS1	1064.4	0.563372	0.204333	2.75712	0.0058313	0.0422309
PBANKA_0612300	AKIT7	3611.5	0.558055	0.194275	2.8725	0.00407232	0.0328514
PBANKA_0820800	RCC-PIP	2833.84	0.557526	0.191133	2.91695	0.0035347	0.0298651
PBANKA_1034300	AP2-G2	5147.69	0.555365	0.196908	2.82043	0.00479588	0.0364881
PBANKA_0409400	PKRP	27918.2	0.555241	0.18477	3.00503	0.0026555	0.0247368
PBANKA_0825500	N/A	24263.4	0.554009	0.184851	2.99706	0.00272598	0.0252328
PBANKA_0827600	N/A	6108.52	0.552893	0.195207	2.83235	0.00462078	0.035893
PBANKA_0831200	N/A	7072.56	0.552281	0.20124	2.74438	0.0060625	0.0433846
PBANKA_1343400	N/A	4249.57	0.550685	0.182712	3.01395	0.0025787	0.0243034
PBANKA_1215800	N/A	1710.1	0.550427	0.196024	2.80795	0.00498582	0.0374597
PBANKA_0910700	N/A	5100.29	0.549957	0.187858	2.92751	0.00341687	0.0293013
PBANKA_1433800	N/A	1926.07	0.548125	0.203767	2.68996	0.00714601	0.0490245
PBANKA_1435500	N/A	2053.87	0.54794	0.195031	2.80951	0.00496175	0.0373372
PBANKA_1212000	N/A	3693.76	0.543401	0.195071	2.78566	0.00534183	0.039518
PBANKA_1337500	STU2	9286.58	0.542726	0.19044	2.84984	0.00437406	0.0347584
PBANKA_0514300	N/A	21742	0.54244	0.192004	2.82515	0.00472585	0.036184
PBANKA_0303300	N/A	2532	0.534207	0.188361	2.83608	0.00456706	0.0357641
PBANKA_1314100	N/A	1580.9	0.532974	0.19482	2.73572	0.00622439	0.0440833
PBANKA_0831000	MSP1	5164.76	0.532215	0.192045	2.7713	0.00558331	0.0408651
PBANKA_1434600	FRM2	31408.1	0.532005	0.178226	2.985	0.00283579	0.0258659
PBANKA_0415600	N/A	1907.09	0.531456	0.194146	2.7374	0.00619263	0.0440192
PBANKA_1228300	LSD2	35321.5	0.529145	0.179167	2.95336	0.00314336	0.0277769
PBANKA_0807500	N/A	4553.69	0.5275	0.182464	2.89098	0.0038404	0.031779
PBANKA_0202500	N/A	4046.06	0.526485	0.188193	2.79758	0.0051487	0.03846
PBANKA_1306300	N/A	3980.8	0.525816	0.194245	2.70697	0.00678995	0.0471187
PBANKA_1443900	N/A	3297.42	0.519955	0.190692	2.72667	0.00639765	0.0449141
PBANKA_1245300	FRM1	3527.65	0.519783	0.183932	2.82595	0.00471404	0.0361552
PBANKA_0914100	N/A	3300.74	0.519647	0.183861	2.82631	0.00470873	0.0361552
PBANKA_0510800	N/A	5000.89	0.516741	0.186543	2.77008	0.0056042	0.0409557
PBANKA_0106300	N/A	60908.2	0.508576	0.178114	2.85535	0.00429899	0.0343349
PBANKA_1461600	N/A	4350.54	0.508278	0.187129	2.7162	0.00660365	0.0459583
PBANKA_1449900	NOT4	3493.86	0.503498	0.186311	2.70246	0.00688291	0.0475582
PBANKA_0416500	CuTP	2627.15	0.50102	0.186039	2.69309	0.00707937	0.0487757
PBANKA_0801800	BTP2	31631.9	0.484285	0.175461	2.76008	0.00577874	0.0420399
PBANKA_1238100	N/A	3980.76	-0.489494	0.18194	-2.69042	0.00713622	0.0490245
PBANKA_0923300	N/A	18379.7	-0.490514	0.178248	-2.75186	0.0059257	0.042658
PBANKA_0909500	N/A	5085.62	-0.506321	0.179171	-2.82591	0.00471459	0.0361552
PBANKA_1109300	N/A	40499.4	-0.506708	0.183661	-2.75893	0.00579916	0.0421248
PBANKA_1335000	N/A	21640.9	-0.50781	0.186933	-2.71653	0.00659703	0.0459583
PBANKA_0213500	N/A	2658.14	-0.512177	0.185721	-2.75778	0.0058195	0.0422089
PBANKA_0504300	N/A	4485.76	-0.519931	0.184424	-2.81922	0.00481399	0.0365105
PBANKA_1364200	N/A	6707.06	-0.51994	0.18949	-2.74389	0.00607168	0.0433846
PBANKA_0501700	HAD5	2323.67	-0.520186	0.189116	-2.75062	0.00594831	0.0427568
PBANKA_1328400	COX6A	3525.46	-0.527766	0.193374	-2.72924	0.00634799	0.0446958
PBANKA_1039700	N/A	2585.76	-0.532119	0.194405	-2.73717	0.00619705	0.0440192
PBANKA_0918000	N/A	7550.28	-0.532216	0.180081	-2.95542	0.00312243	0.0277447
PBANKA_0616700	NEK4	7965.84	-0.533128	0.184598	-2.88805	0.00387641	0.0319125
PBANKA_1320700	SPP	8636.58	-0.53355	0.17974	-2.96846	0.00299294	0.0268918
PBANKA_1218500	N/A	11622.9	-0.533746	0.182746	-2.9207	0.00349244	0.0296642
PBANKA_0518500	N/A	11141.8	-0.535935	0.182377	-2.93861	0.00329686	0.0286601
PBANKA_1031900	eIF2gamma	3044.86	-0.537649	0.193449	-2.77927	0.00544807	0.0401805
PBANKA_1455000	SAMC	2555.99	-0.538114	0.18646	-2.88595	0.0039023	0.0320023
PBANKA_1411100	BCKDHA	2508.11	-0.539873	0.188011	-2.8715	0.00408526	0.0329006
PBANKA_0301600	N/A	65310.5	-0.541428	0.181666	-2.98035	0.00287916	0.0261131
PBANKA_0404900	N/A	1871.54	-0.54411	0.196026	-2.7757	0.00550822	0.0405001
PBANKA_1456200	rabGDI	2430.69	-0.544359	0.186128	-2.92465	0.00344848	0.0294989
PBANKA_1359700	P47	5650.84	-0.546172	0.185296	-2.94756	0.00320289	0.0280968
PBANKA_0712200	PBLP	32150.5	-0.547452	0.17856	-3.06594	0.0021699	0.0215914
PBANKA_0300600	N/A	9800.68	-0.547533	0.19227	-2.84773	0.00440322	0.0348781
PBANKA_1319000	N/A	20712.2	-0.548064	0.182229	-3.00756	0.00263353	0.0245796
PBANKA_1325100	N/A	2301.14	-0.548291	0.198078	-2.76805	0.00563923	0.0411493
PBANKA_1008300	N/A	11504.8	-0.548327	0.181161	-3.02674	0.00247204	0.0234922
PBANKA_0110200	N/A	1670.82	-0.549997	0.194015	-2.83481	0.00458525	0.0358257
PBANKA_0718800	SAR1	4173.58	-0.552787	0.187414	-2.94955	0.00318235	0.0279723
PBANKA_0620400	N/A	19704	-0.552789	0.184648	-2.99374	0.0027558	0.0253765
PBANKA_0807600	RPS11	4731.27	-0.552909	0.192658	-2.8699	0.00410606	0.033013
PBANKA_1024400	N/A	1762.44	-0.554615	0.202687	-2.73632	0.00621307	0.044068
PBANKA_1334700	TMEM43	21361.3	-0.55596	0.19415	-2.86356	0.00418906	0.0335494
PBANKA_0414100	PPase	6411.28	-0.559075	0.183735	-3.04283	0.00234366	0.0228542
PBANKA_1141700	N/A	8627.05	-0.560945	0.18069	-3.10446	0.00190626	0.0194917
PBANKA_0915400	N/A	3480.42	-0.561472	0.193728	-2.89825	0.00375256	0.031267
PBANKA_1133200	CRK2	3048.35	-0.563478	0.188711	-2.98594	0.00282711	0.0258368
PBANKA_0622800	N/A	3914.96	-0.565865	0.190914	-2.96398	0.00303689	0.0272309
PBANKA_1342300	N/A	34435.1	-0.567217	0.186801	-3.03647	0.00239362	0.0231016
PBANKA_0511800	N/A	1626.82	-0.567396	0.200248	-2.83346	0.00460467	0.0358257
PBANKA_1234800	CEN3	8551.53	-0.567531	0.19677	-2.88423	0.00392371	0.0320023
PBANKA_1007300	RPS9	2735.62	-0.568008	0.194039	-2.92729	0.0034193	0.0293013
PBANKA_1355700	RF2	62512	-0.568304	0.203977	-2.78612	0.00533438	0.039518
PBANKA_0315800	MyoA	10285.6	-0.571142	0.208207	-2.74314	0.00608541	0.0434183
PBANKA_1350500	N/A	2330.01	-0.571323	0.18784	-3.04153	0.00235375	0.0228542
PBANKA_1314300	PV3	3985.39	-0.572641	0.211401	-2.70879	0.00675295	0.0469296
PBANKA_1231300	N/A	60902.9	-0.574875	0.175229	-3.2807	0.00103549	0.0129939
PBANKA_1112800	MFS1	2999.74	-0.577597	0.196203	-2.94388	0.00324129	0.0283819
PBANKA_1226900	N/A	1063.43	-0.578537	0.210966	-2.74232	0.00610069	0.0434629
PBANKA_1136300	N/A	2056.29	-0.5788	0.18874	-3.06665	0.00216474	0.0215847
PBANKA_1242100	RRM1	3699.25	-0.578881	0.191099	-3.02921	0.00245191	0.0234759
PBANKA_1125600	METAP1a	14794.1	-0.580661	0.188258	-3.08438	0.00203973	0.0206808
PBANKA_0418200	N/A	3956.21	-0.582056	0.191448	-3.04028	0.00236358	0.0229035
PBANKA_1459500	RAB7	75954.2	-0.582221	0.192181	-3.02954	0.00244928	0.0234759
PBANKA_1019500	MTIP	9522.18	-0.583623	0.180879	-3.22658	0.00125278	0.0146797
PBANKA_1418900	N/A	15868.8	-0.584277	0.188884	-3.09332	0.00197934	0.0201533
PBANKA_0706700	Rab11a	18310.6	-0.588973	0.191795	-3.07085	0.00213447	0.0215054
PBANKA_0825700	DTC	12611.9	-0.591113	0.187826	-3.14713	0.00164883	0.0177646
PBANKA_1430600	TRF1	9407.11	-0.591216	0.203078	-2.91127	0.00359958	0.03036
PBANKA_1463900	N/A	4249.1	-0.591504	0.182367	-3.24349	0.00118075	0.0141455
PBANKA_0623200	N/A	2464.59	-0.592576	0.200188	-2.96009	0.00307547	0.0274286
PBANKA_1461300	N/A	70488	-0.593055	0.204279	-2.90316	0.00369421	0.0309414
PBANKA_0823100	N/A	35757.7	-0.59407	0.188324	-3.15451	0.00160768	0.0174383
PBANKA_1241900	SAMS	1462.1	-0.594126	0.195281	-3.04241	0.00234691	0.0228542
PBANKA_0506900	UBC13	7089.33	-0.59484	0.198419	-2.99789	0.00271854	0.0252263
PBANKA_1357900	PLSCR	7108.72	-0.594891	0.188702	-3.15254	0.00161859	0.0174778
PBANKA_0715400	N/A	1961.32	-0.594893	0.197628	-3.01016	0.0026111	0.0244804
PBANKA_0601100	N/A	6972.71	-0.596135	0.178983	-3.33068	0.000866339	0.0116312
PBANKA_1138600	PIC	35740.6	-0.597034	0.182119	-3.27825	0.00104451	0.013032
PBANKA_0908900	N/A	2825.01	-0.598681	0.195158	-3.06767	0.00215734	0.0215555
PBANKA_0907800	N/A	991.084	-0.599218	0.218363	-2.74414	0.00606701	0.0433846
PBANKA_1230500	N/A	2420.92	-0.600734	0.187984	-3.19567	0.00139506	0.0156976
PBANKA_1418400	ALYREF	2680.31	-0.602337	0.186154	-3.2357	0.00121345	0.014422
PBANKA_1004400	ClpS	2181.73	-0.603083	0.189982	-3.17442	0.00150136	0.0166341
PBANKA_1138100	N/A	1647.3	-0.60317	0.196283	-3.07296	0.0021195	0.0213994
PBANKA_0906400	14-3-3II	3886.8	-0.605166	0.221806	-2.72836	0.00636505	0.0447505
PBANKA_1316200	N/A	1012.42	-0.605728	0.210076	-2.88337	0.0039344	0.0320069
PBANKA_1323300	STX6	2112.53	-0.606105	0.21409	-2.83108	0.00463914	0.0359776
PBANKA_0621900	N/A	1591.8	-0.606885	0.199752	-3.0382	0.00237998	0.0230161
PBANKA_1424900	PAM18	908.568	-0.606967	0.212803	-2.85225	0.00434115	0.0346142
PBANKA_0301300	N/A	29487.4	-0.607441	0.207114	-2.93289	0.00335824	0.0289707
PBANKA_1100860	N/A	4252.67	-0.60783	0.193967	-3.13367	0.00172635	0.018313
PBANKA_1126200	N/A	3530.12	-0.609243	0.194869	-3.12643	0.00176942	0.0185759
PBANKA_0823200	DJ1	32893.8	-0.610022	0.192843	-3.1633	0.00155989	0.017035
PBANKA_1411400	N/A	3659.79	-0.610156	0.195171	-3.12627	0.00177042	0.0185759
PBANKA_1114100	NEDD8	13870.4	-0.611278	0.211617	-2.88861	0.00386946	0.0319098
PBANKA_1205200	N/A	12053.7	-0.611751	0.183684	-3.33046	0.000867029	0.0116312
PBANKA_1240700	TMEM147	4148.87	-0.612066	0.188033	-3.25509	0.00113356	0.0136822
PBANKA_0105100	NEK2	16100.8	-0.612256	0.206717	-2.96181	0.0030584	0.027327
PBANKA_1034700	N/A	7232.22	-0.612844	0.195218	-3.13928	0.00169362	0.0180158
PBANKA_1027000	TRM112	21788.1	-0.613175	0.185426	-3.30685	0.000943528	0.0123461
PBANKA_0204600	SPT	2583.79	-0.613598	0.218245	-2.81151	0.00493096	0.0371837
PBANKA_0707100	PHIL1	142012	-0.613887	0.185988	-3.30068	0.000964518	0.0125544
PBANKA_1452500	IMC1i	10805	-0.614973	0.18906	-3.25279	0.00114278	0.013759
PBANKA_1325400	N/A	8282.07	-0.617019	0.194467	-3.17288	0.00150937	0.0166341
PBANKA_0707400	N/A	3850.32	-0.618981	0.186312	-3.32228	0.000892855	0.0118784
PBANKA_0514000	N/A	1150.56	-0.619191	0.227603	-2.72049	0.00651856	0.0455637
PBANKA_1138000	SPT4	3283.63	-0.619946	0.203005	-3.05385	0.00225925	0.0222506
PBANKA_1421800	N/A	1112.3	-0.621039	0.216002	-2.87515	0.00403831	0.0326866
PBANKA_1329400	N/A	23582.8	-0.621455	0.193356	-3.21405	0.00130877	0.0151256
PBANKA_0904100	N/A	1261.3	-0.621476	0.206513	-3.00938	0.00261782	0.0244804
PBANKA_0610200	RAB6	13447.3	-0.621992	0.220618	-2.81931	0.00481265	0.0365105
PBANKA_0814000	MCM5	852.65	-0.624266	0.214916	-2.9047	0.00367602	0.0308427
PBANKA_1219100	N/A	26170	-0.625834	0.182804	-3.42352	0.000618162	0.00916021
PBANKA_1336200	IMC1d	5508.74	-0.629141	0.212299	-2.96346	0.00304199	0.0272309
PBANKA_0405300	N/A	3556.63	-0.629628	0.195444	-3.22152	0.00127512	0.0149052
PBANKA_1117100	N/A	6215.69	-0.631083	0.180847	-3.48959	0.00048376	0.00761369
PBANKA_0214800	H3.3	9237.33	-0.632141	0.191203	-3.30613	0.000945954	0.0123461
PBANKA_0305000	N/A	2175.68	-0.632737	0.23468	-2.69617	0.00701416	0.0483957
PBANKA_0417200	SERA2	75894.4	-0.633612	0.19851	-3.19183	0.00141373	0.0158707
PBANKA_1418800	PH	2438.42	-0.634552	0.206362	-3.07495	0.0021054	0.0213017
PBANKA_1437700	N/A	56983	-0.637521	0.203648	-3.13051	0.00174504	0.0183897
PBANKA_0905600	N/A	7377.21	-0.638098	0.201813	-3.16183	0.00156783	0.017083
PBANKA_0108800	N/A	7951.9	-0.638669	0.188285	-3.39203	0.000693756	0.00994384
PBANKA_1103100	H3	3359.24	-0.64089	0.194578	-3.29374	0.000988642	0.0126112
PBANKA_1209400	ADF1	14709.7	-0.642468	0.198611	-3.2348	0.00121728	0.014422
PBANKA_0402700	ISP1	155241	-0.642909	0.180312	-3.56553	0.000363121	0.00629062
PBANKA_1204500	IMC1e	12931.7	-0.643143	0.209551	-3.06915	0.00214669	0.0215555
PBANKA_1331100	N/A	1021.91	-0.643374	0.222413	-2.8927	0.00381942	0.0316598
PBANKA_1000600	N/A	3849.74	-0.645001	0.187648	-3.43729	0.000587563	0.00881528
PBANKA_1135200	N/A	2111.76	-0.645045	0.189206	-3.40921	0.000651506	0.00947981
PBANKA_1414100	N/A	12103.3	-0.645177	0.181208	-3.56041	0.000370272	0.00632603
PBANKA_0600400	PIS	910.42	-0.645466	0.221131	-2.91893	0.00351241	0.0297795
PBANKA_1451500	PIS	1852.01	-0.647953	0.202392	-3.20148	0.00136724	0.0154933
PBANKA_0943600	N/A	10405.2	-0.648087	0.207594	-3.12189	0.00179692	0.018813
PBANKA_0201600	N/A	18765.1	-0.64828	0.211605	-3.06364	0.00218663	0.0216821
PBANKA_1014500	N/A	3459.94	-0.648958	0.188406	-3.44446	0.000572197	0.00866573
PBANKA_0502650	ETRAMP	15494.9	-0.649274	0.218029	-2.97792	0.00290208	0.0262222
PBANKA_1430300	PMIX	33112	-0.651965	0.201843	-3.23006	0.00123762	0.0145672
PBANKA_1414500	N/A	42830.3	-0.652208	0.190597	-3.42192	0.000621803	0.0091859
PBANKA_1013800	N/A	4250.38	-0.652393	0.204727	-3.18666	0.00143927	0.0161198
PBANKA_0404700	GSK3alpha	5083.67	-0.654239	0.216024	-3.02855	0.00245731	0.023481
PBANKA_1243500	COX2B	18241.7	-0.656522	0.180872	-3.62977	0.000283674	0.00532485
PBANKA_0304400	GRX1	1233.8	-0.658787	0.221019	-2.98067	0.00287614	0.0261131
PBANKA_1355500	N/A	1974.03	-0.65896	0.205697	-3.20354	0.00135749	0.015419
PBANKA_0306500	MSP4/5	1670.35	-0.659098	0.220712	-2.98624	0.00282429	0.0258368
PBANKA_1239000	CK2beta2	59891.7	-0.659697	0.211558	-3.11828	0.00181909	0.0188799
PBANKA_0706900	N/A	615.386	-0.661674	0.232524	-2.84562	0.00443257	0.0350529
PBANKA_0512900	N/A	2396.96	-0.663039	0.234588	-2.8264	0.00470746	0.0361552
PBANKA_1137700	TOM7	4284.59	-0.665237	0.186817	-3.5609	0.000369583	0.00632603
PBANKA_0104000	N/A	4216.38	-0.666341	0.182149	-3.65823	0.000253962	0.00495061
PBANKA_1306400	COX2A	495.539	-0.66685	0.240312	-2.77493	0.00552128	0.0405343
PBANKA_1138200	N/A	30193.1	-0.667564	0.190393	-3.50624	0.000454478	0.00725687
PBANKA_1238700	N/A	1311.89	-0.668669	0.20384	-3.28036	0.00103676	0.0129939
PBANKA_1311200	RUVB3	587.724	-0.669035	0.2431	-2.7521	0.00592136	0.042658
PBANKA_0606200	N/A	104029	-0.670951	0.175749	-3.81766	0.000134722	0.00318048
PBANKA_1123200	N/A	12351.7	-0.671703	0.185749	-3.61619	0.00029897	0.00551662
PBANKA_1035400	N/A	54109.2	-0.672248	0.17713	-3.79523	0.000147506	0.00333517
PBANKA_0214500	N/A	1418.94	-0.67494	0.195588	-3.45082	0.00055888	0.00851762
PBANKA_1340200	GAPM3	1358.79	-0.67595	0.245861	-2.74932	0.00597189	0.0428623
PBANKA_1109900	IMP2	7829.05	-0.676222	0.179512	-3.767	0.000165219	0.00361679
PBANKA_1104200	LSM6	1723.33	-0.679913	0.195591	-3.4762	0.000508579	0.00790102
PBANKA_1346800	SIP	1666.33	-0.679939	0.210541	-3.22948	0.00124015	0.0145672
PBANKA_0821200	BCKDHB	23075.7	-0.680784	0.214199	-3.17827	0.00148155	0.0164784
PBANKA_0511500	N/A	669.24	-0.681017	0.22932	-2.96972	0.00298073	0.0268321
PBANKA_0307000	N/A	5192.88	-0.683994	0.246263	-2.7775	0.00547795	0.0403391
PBANKA_0931100	RPB7	5556.61	-0.684525	0.183947	-3.72133	0.000198179	0.00416781
PBANKA_0213100	N/A	554.872	-0.685077	0.242175	-2.82885	0.00467159	0.0361129
PBANKA_0621000	N/A	1695.64	-0.688542	0.221195	-3.11283	0.00185301	0.0191095
PBANKA_1318200	SRP9	4788.69	-0.690401	0.187181	-3.68841	0.000225662	0.00462463
PBANKA_1015400	N/A	32296.7	-0.690822	0.177099	-3.90078	9.59e-05	0.00244329
PBANKA_1439000	ISCU	443.836	-0.691836	0.23781	-2.90919	0.00362363	0.0305094
PBANKA_1410000	N/A	4401.8	-0.692008	0.198085	-3.49349	0.000476755	0.0075528
PBANKA_1201300	N/A	1561.64	-0.695461	0.21289	-3.26676	0.00108786	0.0132973
PBANKA_1217600	RPT1	3423.44	-0.696875	0.204499	-3.40771	0.000655097	0.00950286
PBANKA_1365600	N/A	430.175	-0.697197	0.249637	-2.79285	0.00522464	0.0389503
PBANKA_1243100	H2A.Z	3911.19	-0.698279	0.195606	-3.56982	0.000357224	0.0062108
PBANKA_0507100	N/A	2032.94	-0.698393	0.245785	-2.84148	0.00449044	0.0354191
PBANKA_1354200	CPalpha	1010.05	-0.700584	0.223762	-3.13094	0.00174248	0.0183897
PBANKA_1003800	N/A	3785.25	-0.700618	0.25272	-2.77231	0.00556592	0.0407998
PBANKA_0716900	MPC1	1822.71	-0.700628	0.196908	-3.55815	0.000373472	0.00634345
PBANKA_0503600	N/A	3785.75	-0.701557	0.213476	-3.28634	0.00101497	0.0128296
PBANKA_1204400	ARO	3210.32	-0.701883	0.184558	-3.80305	0.000142923	0.00327983
PBANKA_0902900	N/A	63290.9	-0.702406	0.189074	-3.71497	0.000203226	0.00423694
PBANKA_1140600	ALBA3	2036.7	-0.70329	0.206052	-3.41317	0.000642119	0.00942818
PBANKA_1354100	N/A	4315.98	-0.704062	0.196889	-3.57593	0.000348987	0.00617663
PBANKA_1431050	RPB5	2243.18	-0.705367	0.202626	-3.48112	0.000499319	0.00780753
PBANKA_1202000	RAB11b	39767.7	-0.705429	0.1976	-3.56998	0.000357009	0.0062108
PBANKA_1140900	CPN10	3167.52	-0.706302	0.200075	-3.53019	0.000415257	0.00677925
PBANKA_1445400	IMC1c	2343.01	-0.707189	0.203734	-3.47115	0.000518243	0.00799955
PBANKA_1023200	mtRPS17	2296.36	-0.710647	0.197533	-3.59762	0.000321148	0.00581446
PBANKA_0703900	SEC13	5017.67	-0.71105	0.199716	-3.56031	0.00037042	0.00632603
PBANKA_0314500	SF3B4	4394.66	-0.711726	0.214039	-3.32522	0.000883498	0.0118192
PBANKA_1358600	RACK1	2466.84	-0.712218	0.187461	-3.79928	0.000145119	0.00331229
PBANKA_1105400	RPS26	975.622	-0.71259	0.228643	-3.1166	0.00182948	0.0189072
PBANKA_1210700	IDH	4717.01	-0.712729	0.183391	-3.88639	0.000101747	0.00256552
PBANKA_0712900	SUMO	114519	-0.712861	0.201567	-3.5366	0.000405315	0.0067079
PBANKA_1245900	QCR7	1808.83	-0.715002	0.191769	-3.72846	0.000192656	0.00408736
PBANKA_1205100	HMGB2	29054	-0.717646	0.18871	-3.80289	0.000143016	0.00327983
PBANKA_1033300	N/A	1921.46	-0.717712	0.200243	-3.58421	0.000338104	0.00600851
PBANKA_0940300	N/A	3176.45	-0.717737	0.224576	-3.19597	0.00139362	0.0156976
PBANKA_1006300	N/A	1041.52	-0.71787	0.265546	-2.70337	0.00686407	0.0474962
PBANKA_1009800	N/A	1322.79	-0.719424	0.213365	-3.37179	0.000746803	0.0104552
PBANKA_0901000	PLP1	3464.4	-0.724707	0.189941	-3.81543	0.000135944	0.00319369
PBANKA_1318800	COX15	8650.78	-0.724976	0.190472	-3.80622	0.000141109	0.00326721
PBANKA_1024700	N/A	4372	-0.726345	0.196082	-3.70429	0.000211981	0.00438155
PBANKA_1303300	PTP1	5853.86	-0.726485	0.214456	-3.38757	0.000705152	0.00996774
PBANKA_1024800	UFD1	5437.4	-0.726976	0.220427	-3.29804	0.00097362	0.0125634
PBANKA_1242400	N/A	6978.08	-0.730111	0.207293	-3.52213	0.000428098	0.00689539
PBANKA_1445800	N/A	2855.49	-0.73086	0.20471	-3.57022	0.000356686	0.0062108
PBANKA_0707500	N/A	1759.73	-0.734003	0.200558	-3.65981	0.0002524	0.00495061
PBANKA_0700800	RAB2	1211.75	-0.735608	0.222481	-3.30638	0.000945093	0.0123461
PBANKA_0417400	N/A	5231.2	-0.735912	0.179192	-4.10683	4.01e-05	0.00131641
PBANKA_0620300	N/A	55853.8	-0.73603	0.188214	-3.91061	9.21e-05	0.00237103
PBANKA_1233600	N/A	53375	-0.736239	0.182243	-4.03988	5.35e-05	0.00160974
PBANKA_0709000	N/A	7916.47	-0.738051	0.19074	-3.8694	0.000109102	0.00270844
PBANKA_0932300	PSOP13	894.808	-0.739937	0.218318	-3.38927	0.000700792	0.00996774
PBANKA_0405400	SEC61B	4804.53	-0.740549	0.218398	-3.39082	0.00069684	0.0099584
PBANKA_1017700	ApiAP2	2056.33	-0.74093	0.234972	-3.15327	0.0016145	0.0174729
PBANKA_0830400	RPS12	64741.2	-0.741714	0.185257	-4.00371	6.24e-05	0.00172593
PBANKA_1422900	QCR6	39945.4	-0.742463	0.192163	-3.86372	0.000111675	0.00274401
PBANKA_1028400	N/A	6522.6	-0.744226	0.196349	-3.79032	0.000150453	0.00335973
PBANKA_0623500	SIMP	886.68	-0.744954	0.211313	-3.52537	0.000422897	0.00683447
PBANKA_1434400	N/A	4514.42	-0.745156	0.180936	-4.11833	3.82e-05	0.00129523
PBANKA_0932100	N/A	3179.12	-0.746899	0.189834	-3.93448	8.34e-05	0.0021942
PBANKA_0901700	PSOP17	3345.31	-0.748366	0.208665	-3.58645	0.000335206	0.0060013
PBANKA_0213000	DHHC9	3278.5	-0.750097	0.201987	-3.71359	0.000204344	0.00424189
PBANKA_1037800	N/A	2235.46	-0.753305	0.189291	-3.9796	6.9e-05	0.00187824
PBANKA_1329100	N/A	45587.3	-0.753453	0.2055	-3.66644	0.000245953	0.00491497
PBANKA_1364300	SOAP	18858.5	-0.754923	0.19003	-3.97264	7.11e-05	0.00192316
PBANKA_0943700	PM8	1212.74	-0.755644	0.26116	-2.89341	0.00381083	0.0316431
PBANKA_1124900	N/A	1593.71	-0.756545	0.202288	-3.73993	0.000184071	0.00393993
PBANKA_0904900	N/A	912.253	-0.759372	0.239997	-3.16409	0.00155568	0.0170276
PBANKA_1136400	N/A	1065.94	-0.763031	0.215869	-3.5347	0.000408245	0.00673324
PBANKA_1233900	N/A	1369.11	-0.765583	0.228819	-3.3458	0.000820458	0.0112573
PBANKA_1350400	EMC3	1239.53	-0.765992	0.243713	-3.14301	0.00167218	0.0179359
PBANKA_0943400	N/A	135363	-0.766995	0.177323	-4.32541	1.52e-05	0.000718206
PBANKA_0524800	N/A	7237.15	-0.767525	0.235509	-3.259	0.00111805	0.0135816
PBANKA_0510900	N/A	4599.45	-0.768363	0.187986	-4.08733	4.36e-05	0.00137355
PBANKA_1311400	2024-09-01	9237.31	-0.768433	0.202666	-3.79162	0.000149666	0.00335973
PBANKA_0517600	RPS2	57393.8	-0.768829	0.203572	-3.77669	0.000158927	0.00351097
PBANKA_0932200	N/A	7771.84	-0.769022	0.213957	-3.59428	0.000325293	0.00586747
PBANKA_1105500	N/A	2246.49	-0.769059	0.191588	-4.01413	5.97e-05	0.00170026
PBANKA_0803800	N/A	458.391	-0.771155	0.26225	-2.94053	0.00327654	0.0285349
PBANKA_0810500	MED11	4993.59	-0.772711	0.180831	-4.27312	1.93e-05	0.000814662
PBANKA_1244000	N/A	746.376	-0.773052	0.216277	-3.57435	0.000351094	0.00617663
PBANKA_0934200	ARP	4768.15	-0.77344	0.190272	-4.06491	4.81e-05	0.00147398
PBANKA_1459300	N/A	22565.4	-0.775104	0.181031	-4.28161	1.86e-05	0.000805047
PBANKA_1437600	DSK2	92861.2	-0.775224	0.185428	-4.18074	2.91e-05	0.00106013
PBANKA_1026000	ACT1	7532.31	-0.775741	0.183954	-4.21703	2.48e-05	0.000946158
PBANKA_1324100	GAP45	1810.94	-0.780417	0.213105	-3.66213	0.00025013	0.00493699
PBANKA_1318500	N/A	17854.1	-0.781134	0.238955	-3.26896	0.00107943	0.0132596
PBANKA_1327800	UCHL3	1341.84	-0.783116	0.223242	-3.50793	0.000451607	0.0072498
PBANKA_0512800	N/A	8076.8	-0.785998	0.235157	-3.34244	0.000830457	0.0113622
PBANKA_0518200	N/A	1672.48	-0.789356	0.230806	-3.42	0.0006262	0.00922257
PBANKA_1314800	MTRAP	8773.39	-0.791785	0.208918	-3.78994	0.000150686	0.00335973
PBANKA_1104500	SDHA	2561.52	-0.800695	0.204681	-3.91192	9.16e-05	0.0023709
PBANKA_1311300	eEF2	2131.31	-0.801589	0.212154	-3.77834	0.000157877	0.00350384
PBANKA_0415200	N/A	1639.27	-0.802326	0.199749	-4.01667	5.9e-05	0.00170026
PBANKA_0512000	N/A	15212.5	-0.80311	0.178762	-4.49263	7.03e-06	0.000389426
PBANKA_0201900	VPS46	2412.89	-0.80441	0.230221	-3.49408	0.000475697	0.0075528
PBANKA_0602800	DHHC10	27964.8	-0.804435	0.185322	-4.34075	1.42e-05	0.000683856
PBANKA_1360400	N/A	27333.4	-0.807512	0.185342	-4.35688	1.32e-05	0.000648343
PBANKA_0815400	UBC	47263.4	-0.808078	0.191052	-4.22962	2.34e-05	0.000909158
PBANKA_0505100	N/A	3310.03	-0.812654	0.19033	-4.2697	1.96e-05	0.000819701
PBANKA_1132600	N/A	1778.13	-0.819532	0.194524	-4.21301	2.52e-05	0.000955575
PBANKA_0605800	ARF1	12680.5	-0.821708	0.200253	-4.10336	4.07e-05	0.00131641
PBANKA_0523900	N/A	93484.3	-0.822159	0.193147	-4.25664	2.08e-05	0.000832837
PBANKA_0619300	LIMP	1064.28	-0.823387	0.249727	-3.29715	0.000976697	0.0125634
PBANKA_1200800	GAPM2	10387.6	-0.82775	0.180162	-4.59448	4.34e-06	0.000254801
PBANKA_1348400	N/A	2224.32	-0.829803	0.207051	-4.00773	6.13e-05	0.0017181
PBANKA_1237200	TRA2B	2390.67	-0.833223	0.207301	-4.01939	5.83e-05	0.00170026
PBANKA_0714300	CenH3	6951.47	-0.834394	0.190507	-4.37986	1.19e-05	0.000595752
PBANKA_0206500	RPL17	1942.13	-0.834536	0.203177	-4.10743	4e-05	0.00131641
PBANKA_0517000	HSP20	8689.64	-0.835063	0.20383	-4.09686	4.19e-05	0.0013446
PBANKA_0916650	RAB5c	1308.43	-0.838589	0.208853	-4.01521	5.94e-05	0.00170026
PBANKA_1359000	ETRAMP10.2	20471.7	-0.841212	0.177113	-4.74959	2.04e-06	0.000136342
PBANKA_1445000	N/A	16125.6	-0.842082	0.189474	-4.44431	8.82e-06	0.000477127
PBANKA_1326300	SEC61A	2736.01	-0.848027	0.206331	-4.11003	3.96e-05	0.00131641
PBANKA_1352500	SPM2	52397.2	-0.851108	0.203159	-4.18937	2.8e-05	0.00104433
PBANKA_1129000	CYT1	24837	-0.851628	0.199601	-4.26664	1.98e-05	0.00082174
PBANKA_1100900	N/A	1353.15	-0.852868	0.221861	-3.84415	0.000120971	0.00292762
PBANKA_0209300	PSOP6	17129.9	-0.855054	0.175122	-4.88263	1.05e-06	8.54e-05
PBANKA_1404200	N/A	230.691	-0.855309	0.284911	-3.00202	0.00268194	0.0249348
PBANKA_0517900	ARP1	635.508	-0.857269	0.292076	-2.93509	0.00333447	0.0289348
PBANKA_0415700	N/A	8115.07	-0.858518	0.195508	-4.39121	1.13e-05	0.000571433
PBANKA_1009900	N/A	27873.8	-0.87285	0.217199	-4.01867	5.85e-05	0.00170026
PBANKA_0720900	ATG3	60271.2	-0.876617	0.198498	-4.41625	1e-05	0.000523154
PBANKA_1244400	N/A	1553.16	-0.894602	0.210713	-4.24559	2.18e-05	0.00086064
PBANKA_1300096	CRONE	186.622	-0.896995	0.316568	-2.8335	0.00460418	0.0358257
PBANKA_1303500	N/A	4267.52	-0.899705	0.192282	-4.6791	2.88e-06	0.000183694
PBANKA_0616000	N/A	474.092	-0.902341	0.241029	-3.74371	0.000181323	0.00391593
PBANKA_1360900	NDUFA4	1023.37	-0.905826	0.217943	-4.15625	3.24e-05	0.00114653
PBANKA_0810700	N/A	85579.3	-0.912931	0.17964	-5.08201	3.73e-07	3.39e-05
PBANKA_1325900	N/A	725.126	-0.919356	0.228	-4.03226	5.52e-05	0.0016525
PBANKA_1338900	SPM1	73584.8	-0.925594	0.179006	-5.17074	2.33e-07	2.44e-05
PBANKA_0623400	N/A	472.076	-0.929054	0.255414	-3.63745	0.000275354	0.00525142
PBANKA_1444300	GAPM1	507.787	-0.93058	0.290127	-3.20749	0.00133897	0.0152807
PBANKA_1445100	N/A	1134.73	-0.931187	0.21417	-4.34789	1.37e-05	0.000668659
PBANKA_1353800	N/A	111547	-0.934999	0.204939	-4.56233	5.06e-06	0.000290301
PBANKA_1449500	ClpQ	8910.99	-0.945068	0.203618	-4.64138	3.46e-06	0.00021098
PBANKA_1354900	ROVER	112418	-0.951346	0.196862	-4.83255	1.35e-06	0.000101969
PBANKA_1338100	CRYSP	43940	-0.965156	0.195685	-4.9322	8.13e-07	6.88e-05
PBANKA_1115300	GAP40	171261	-0.968553	0.187197	-5.17399	2.29e-07	2.44e-05
PBANKA_0916700	N/A	51708.5	-0.989098	0.211844	-4.66899	3.03e-06	0.000186892
PBANKA_0607600	LSM7	1821.1	-0.989333	0.23694	-4.17546	2.97e-05	0.00107685
PBANKA_1436600	IMC1h	161997	-0.994042	0.189853	-5.23586	1.64e-07	1.93e-05
PBANKA_1219200	COX4	8378.43	-0.997429	0.185968	-5.36344	8.17e-08	1.09e-05
PBANKA_0417700	N/A	4512.54	-1.00314	0.19589	-5.12093	3.04e-07	2.93e-05
PBANKA_0932600	N/A	37619.2	-1.0131	0.196213	-5.16327	2.43e-07	2.49e-05
PBANKA_0939500	RAD51	19462.2	-1.02073	0.177836	-5.7397	9.48e-09	2.08e-06
PBANKA_0903700	CRIPT	2059.44	-1.07953	0.249691	-4.32346	1.54e-05	0.000718206
PBANKA_0836700	N/A	312.695	-1.09145	0.275973	-3.95489	7.66e-05	0.00204864
PBANKA_1245200	N/A	58633.2	-1.0922	0.1866	-5.85316	4.82e-09	1.22e-06
PBANKA_0111400	N/A	1478.3	-1.09958	0.225366	-4.87909	1.07e-06	8.55e-05
PBANKA_1128800	N/A	44866	-1.09981	0.195567	-5.62369	1.87e-08	3.32e-06
PBANKA_0714000	DMC1	134668	-1.12734	0.177565	-6.3489	2.17e-10	7.46e-08
PBANKA_1300200	N/A	747.95	-1.14533	0.24028	-4.76665	1.87e-06	0.000127055
PBANKA_0514900	P28	813903	-1.23375	0.189055	-6.52588	6.76e-11	2.71e-08
PBANKA_0515000	P25	804077	-1.24525	0.205833	-6.04983	1.45e-09	4.36e-07
PBANKA_0519000	N/A	2801.38	-1.25009	0.239855	-5.21186	1.87e-07	2.05e-05
PBANKA_0828800	COX6B	8360.82	-1.26098	0.216814	-5.81596	6.03e-09	1.45e-06
PBANKA_1305000	N/A	32762	-1.30892	0.198116	-6.60684	3.93e-11	1.72e-08
PBANKA_1318600	N/A	161242	-1.31571	0.188053	-6.9965	2.62e-12	1.58e-09
PBANKA_1146721	N/A	79.3862	-1.40193	0.465318	-3.01284	0.00258814	0.0243447
PBANKA_1465051	N/A	78.6497	-1.71079	0.501663	-3.41023	0.000649078	0.00947981
PBANKA_1465200	N/A	119.487	-1.7519	0.384217	-4.55966	5.12e-06	0.000290301
PBANKA_1200091	N/A	41.5357	-1.81562	0.598348	-3.0344	0.00241018	0.0232149
PBANKA_1465100	N/A	71.3066	-1.82586	0.471474	-3.87267	0.00010765	0.00268622
PBANKA_0700561	N/A	188.202	-1.95603	0.344221	-5.68249	1.33e-08	2.66e-06
PBANKA_0317001	N/A	27.4565	-1.98209	0.717139	-2.76389	0.0057117	0.041615
PBANKA_1040300	N/A	96.9486	-2.60769	0.442205	-5.89701	3.7e-09	9.9e-07
PBANKA_0943900	N/A	67.3339	-2.80362	0.498903	-5.61957	1.91e-08	3.32e-06
PBANKA_0200700	N/A	39.2964	-3.07469	0.640913	-4.79736	1.61e-06	0.000113862
PBANKA_1146761	N/A	158.862	-3.43664	0.378021	-9.09112	9.8e-20	9.44e-17
PBANKA_0300100	N/A	302.875	-3.89232	0.314961	-12.3581	4.4e-35	5.3e-32
PBANKA_1100441	N/A	109.309	-3.952	0.457701	-8.63447	5.9e-18	4.74e-15
PBANKA_1430900	N/A	2347.64	-4.60816	0.214869	-21.4463	4.94e-102	1.19e-98
PBANKA_0200600	N/A	2190.05	-5.44271	0.222229	-24.4914	1.82e-132	8.77e-129
