# Supplementary material for: A novel SUN1-ALLAN complex coordinates segregation of the bipartite MTOC across the nuclear envelope during rapid closed mitosis in Plasmodium berghei
Source: eLife. 2025 May 20;14:RP106537. doi: 10.7554/eLife.106537 (PMC12092005; doi:10.7554/eLife.106537)
Supplement: Figure 7—figure supplement 1—source data 3. [file elife-106537-fig7-figsupp1-data3.xlsx]

## Sheet: Allan KO-8 min_DEgenes
geneID	baseMean	log2FoldChange	lfcSE	stat	pvalue	padj
PBANKA_0000801	36.3884	9.48531	4.12765	2.29799	0.0215622	0.0306205		down regulated	263
PBANKA_1400011	14.7969	8.18489	2.19422	3.73021	0.000191319	0.000342547		up regulated	460
PBANKA_0500100	12.2039	7.90374	2.68767	2.94074	0.00327431	0.00516138
PBANKA_0112681	9.1529	7.48837	2.91858	2.56575	0.0102952	0.0151956
PBANKA_1246981	8.7315	7.42105	2.62963	2.82208	0.00477126	0.00734626
PBANKA_0216021	8.6079	7.40464	2.59374	2.85481	0.00430621	0.0066866
PBANKA_0317001	14.2421	5.73518	1.94253	2.95242	0.00315289	0.00498849
PBANKA_0837081	28.4091	5.57509	1.43453	3.88635	0.000101764	0.000187198
PBANKA_1317000	16.3288	5.35821	1.82739	2.93216	0.00336613	0.00529304
PBANKA_1465841	83.7012	4.9163	0.850579	5.77994	7.47263e-09	1.88236e-08
PBANKA_1465600	125.718	4.90033	0.733484	6.6809	2.37481e-11	7.01036e-11
PBANKA_0000600	12.5295	4.43103	1.80432	2.45579	0.0140574	0.0204643
PBANKA_0836981	14.556	4.21122	1.84931	2.27719	0.022775	0.0321741
PBANKA_0915000	661.052	4.14751	0.278273	14.9044	3.08363e-50	3.47231e-49
PBANKA_0837161	39.0526	4.09707	1.413	2.89955	0.00373698	0.00584376
PBANKA_0916300	21.076	4.05681	1.585	2.5595	0.0104822	0.0154537
PBANKA_0600031	145.865	3.89729	0.592681	6.5757	4.84258e-11	1.40352e-10
PBANKA_1300081	48.5511	3.83521	1.1997	3.1968	0.00138963	0.00228072
PBANKA_1465051	56.6925	3.66858	0.82629	4.43982	9.00337e-06	1.81679e-05
PBANKA_1342500	111424	3.59177	0.132998	27.0062	1.25083e-160	6.38046e-158
PBANKA_0943700	3269.83	3.55818	0.173829	20.4694	4.03656e-93	1.35464e-91
PBANKA_1400041	1875.18	3.55218	0.212517	16.7148	1.02222e-62	1.50703e-61
PBANKA_0406900	2011.75	3.55176	0.217247	16.349	4.42388e-60	6.21658e-59
PBANKA_1364400	23020.5	3.54471	0.130959	27.0673	2.3873e-161	1.35307e-158
PBANKA_0000301	528.704	3.5244	0.312668	11.272	1.80419e-29	1.14325e-28
PBANKA_1334800	27712.2	3.51587	0.126538	27.785	6.59305e-170	6.72623e-167
PBANKA_0400600	408.976	3.49475	0.356478	9.80357	1.08677e-22	5.42427e-22
PBANKA_1040541	820.986	3.46686	0.260121	13.3279	1.59324e-40	1.37748e-39
PBANKA_1300100	476.846	3.46001	0.36154	9.57022	1.06682e-21	5.08583e-21
PBANKA_1313200	16529.5	3.45869	0.125799	27.4938	2.08418e-166	1.7719e-163
PBANKA_1246800	665.548	3.45153	0.27389	12.6019	2.06154e-36	1.61287e-35
PBANKA_0707700	1745.97	3.4211	0.196969	17.3687	1.42446e-67	2.43016e-66
PBANKA_1347000	33541.1	3.41064	0.149085	22.8771	7.85746e-116	5.72585e-114
PBANKA_1465200	1563.73	3.39263	0.224158	15.135	9.51366e-52	1.11051e-50
PBANKA_0615500	8397.2	3.38801	0.159569	21.2323	4.80914e-100	1.90166e-98
PBANKA_0944041	48.6466	3.37336	0.92012	3.66622	0.000246166	0.000435702
PBANKA_1128100	10830.8	3.36573	0.1467	22.9428	1.73678e-116	1.30284e-114
PBANKA_0716800	47.8286	3.3587	0.932769	3.60078	0.000317261	0.000555751
PBANKA_0907900	139096	3.31871	0.128459	25.8347	3.6141e-147	9.21775e-145
PBANKA_0609600	472.713	3.2999	0.309989	10.6452	1.83564e-26	1.03695e-25
PBANKA_0623600	1738.62	3.27115	0.192167	17.0224	5.60198e-65	8.87443e-64
PBANKA_0622400	94086.3	3.26933	0.126226	25.9007	6.539e-148	1.75555e-145
PBANKA_0916650	5131	3.25795	0.146068	22.3044	3.35062e-110	1.96454e-108
PBANKA_0903800	48167.2	3.24462	0.120482	26.9305	9.66053e-160	4.10653e-157
PBANKA_1037800	4188.35	3.22687	0.150727	21.4087	1.10929e-101	4.60038e-100
PBANKA_1228900	20091.5	3.22257	0.135313	23.8157	2.29777e-125	2.7258e-123
PBANKA_1240600	20369.1	3.21853	0.115031	27.9798	2.86236e-172	4.86696e-169
PBANKA_0311400	11933.3	3.19098	0.126917	25.1423	1.71777e-139	3.50494e-137
PBANKA_1354600	434.874	3.18215	0.341507	9.31797	1.18585e-20	5.40092e-20
PBANKA_0836941	28.7802	3.16478	1.18778	2.66446	0.00771126	0.0116273
PBANKA_1225900	128708	3.14499	0.112725	27.8998	2.68642e-171	3.42585e-168
PBANKA_0815100	14740.2	3.13947	0.1431	21.939	1.10245e-106	5.6236e-105
PBANKA_1465921	381.818	3.1342	0.331984	9.44081	3.69908e-21	1.71381e-20
PBANKA_0600600	13296.3	3.13354	0.522755	5.99427	2.04398e-09	5.3496e-09
PBANKA_0827400	10748.3	3.12224	0.137511	22.7054	3.96275e-114	2.65974e-112
PBANKA_1026100	1249.53	3.11339	0.203256	15.3175	5.83807e-53	7.07363e-52
PBANKA_0823200	150999	3.11335	0.141855	21.9475	9.15369e-107	4.71646e-105
PBANKA_1466100	685.744	3.10971	0.289517	10.741	6.52984e-27	3.75098e-26
PBANKA_0518100	1085.56	3.0908	0.214842	14.3864	6.30348e-47	6.58894e-46
PBANKA_0926500	13609.6	3.08992	0.123647	24.9899	7.87536e-138	1.38525e-135
PBANKA_0412900	4314.16	3.08021	0.179796	17.1317	8.60331e-66	1.41566e-64
PBANKA_0800061	89.1477	3.07199	0.686332	4.47595	7.60725e-06	1.54538e-05
PBANKA_1009200	26707.4	3.0684	0.119389	25.7008	1.14506e-145	2.78142e-143
PBANKA_0609500	117751	3.06579	0.133574	22.952	1.40767e-116	1.07314e-114
PBANKA_0836900	956.866	3.05576	0.271376	11.2602	2.06201e-29	1.30016e-28
PBANKA_1214400	17467.4	3.02155	0.119156	25.3578	7.36502e-142	1.56537e-139
PBANKA_1305200	63493.4	3.01334	0.112252	26.8445	9.78374e-159	3.83899e-156
PBANKA_0700061	473.985	3.01282	0.309588	9.73173	2.20795e-22	1.08714e-21
PBANKA_0312000	29224.4	3.01233	0.12762	23.6039	3.51608e-123	3.66031e-121
PBANKA_0825500	19647.6	3.01171	0.114651	26.2685	4.38914e-152	1.317e-149
PBANKA_1421500	82528.3	3.00656	0.114136	26.342	6.34054e-153	2.02144e-150
PBANKA_1445000	41434.8	3.00544	0.128012	23.4778	6.8831e-122	6.62466e-120
PBANKA_0944081	183.634	3.00252	0.481881	6.23083	4.63976e-10	1.26835e-09
PBANKA_0901900	116484	2.99674	0.129504	23.1402	1.82608e-118	1.52703e-116
PBANKA_1417400	24170.5	2.99581	0.11978	25.0109	4.65445e-138	8.47941e-136
PBANKA_1354900	214967	2.99212	0.133419	22.4264	2.1731e-111	1.36852e-109
PBANKA_1201800	28122.6	2.98867	0.121226	24.6537	3.36159e-134	5.35859e-132
PBANKA_0317181	1875.33	2.98856	0.176289	16.9526	1.8413e-64	2.84621e-63
PBANKA_1466161	25.4888	2.9876	1.30828	2.28361	0.0223943	0.0317227
PBANKA_1437600	189429	2.9731	0.12327	24.1185	1.59952e-128	2.14715e-126
PBANKA_1459500	184387	2.96972	0.116317	25.5313	8.84803e-144	2.05154e-141
PBANKA_0943800	34.09	2.94774	1.11496	2.64382	0.00819772	0.0122988
PBANKA_0600086	922.311	2.94435	0.263947	11.1551	6.76361e-29	4.16681e-28
PBANKA_0402600	1663.45	2.94259	0.229011	12.8491	8.69859e-38	6.9657e-37
PBANKA_1119500	49.4531	2.92193	0.982544	2.97384	0.00294097	0.00467202
PBANKA_0706600	660.76	2.91673	0.262537	11.1098	1.12433e-28	6.90986e-28
PBANKA_1040521	38.8046	2.91608	1.01365	2.87682	0.00401705	0.00626827
PBANKA_0804321	46.5426	2.90968	0.894108	3.25428	0.0011368	0.00188273
PBANKA_1232000	842.531	2.90778	0.250132	11.625	3.07659e-31	2.06224e-30
PBANKA_1132300	64080.7	2.90462	0.136687	21.2501	3.28779e-100	1.31024e-98
PBANKA_1463300	187167	2.89914	0.124719	23.2454	1.58205e-119	1.345e-117
PBANKA_0700300	117.298	2.89712	0.630343	4.5961	4.30467e-06	8.99186e-06
PBANKA_1444800	112190	2.89293	0.116553	24.8207	5.35543e-136	8.81228e-134
PBANKA_0810700	162119	2.8907	0.158664	18.2189	3.65106e-74	7.10842e-73
PBANKA_0101500	21489.5	2.89042	0.135506	21.3306	5.90956e-101	2.41158e-99
PBANKA_1319000	27776.2	2.88778	0.15939	18.1177	2.30935e-73	4.39552e-72
PBANKA_1143700	4423.11	2.88407	0.156851	18.3873	1.66143e-75	3.37647e-74
PBANKA_0201100	150.713	2.87981	0.529895	5.43467	5.48973e-08	1.30429e-07
PBANKA_0714300	20722	2.86854	0.125129	22.9247	2.63608e-116	1.94879e-114
PBANKA_1433600	1105.65	2.8685	0.260651	11.0051	3.60957e-28	2.17384e-27
PBANKA_1129000	142819	2.86733	0.124669	22.9996	4.70642e-117	3.69345e-115
PBANKA_1014500	10409.7	2.86714	0.132534	21.6333	8.73137e-104	4.0125e-102
PBANKA_1126800	31014.4	2.85837	0.116793	24.4738	2.81097e-132	4.34507e-130
PBANKA_0502000	47515.5	2.84921	0.113889	25.0175	3.94509e-138	7.4533e-136
PBANKA_0916700	133040	2.84749	0.120491	23.6324	1.79091e-123	1.94371e-121
PBANKA_1134900	290158	2.8416	0.13058	21.7614	5.38998e-105	2.54577e-103
PBANKA_1020300	25868	2.8387	0.118877	23.8794	5.0162e-126	6.0923e-124
PBANKA_1138900	34360.6	2.83646	0.113271	25.0413	2.17168e-138	4.26067e-136
PBANKA_0301600	188466	2.81258	0.117151	24.0082	2.28315e-127	2.98625e-125
PBANKA_1025700	1059.98	2.80986	0.214325	13.1103	2.87539e-39	2.40055e-38
PBANKA_0938000	117129	2.79883	0.118073	23.7041	3.26867e-124	3.62467e-122
PBANKA_1323800	15320.5	2.79347	0.120043	23.2706	8.79921e-120	7.60759e-118
PBANKA_1300096	273.237	2.78918	0.41362	6.74334	1.54791e-11	4.61479e-11
PBANKA_1422900	80113.1	2.78867	0.129997	21.4518	4.39136e-102	1.8667e-100
PBANKA_0517600	208865	2.78818	0.118079	23.6128	2.84957e-123	3.02826e-121
PBANKA_1245200	297122	2.78756	0.125971	22.1285	1.67949e-108	9.31205e-107
PBANKA_1407900	98207.9	2.78703	0.124624	22.3636	8.91272e-111	5.41235e-109
PBANKA_0816800	23305.3	2.78484	0.119559	23.2927	5.26251e-120	4.62828e-118
PBANKA_1133100	37834.1	2.78418	0.123552	22.5344	1.9112e-112	1.21863e-110
PBANKA_1002100	26341.4	2.78331	0.117414	23.7052	3.18773e-124	3.61347e-122
PBANKA_0608600	75184.3	2.77545	0.114782	24.1802	3.59439e-129	4.95541e-127
PBANKA_0814500	23903.4	2.77282	0.124166	22.3315	1.82823e-110	1.08439e-108
PBANKA_0905900	69585.1	2.76837	0.11999	23.0717	8.91914e-118	7.22167e-116
PBANKA_0408200	8359.14	2.74877	0.148594	18.4986	2.12037e-76	4.46942e-75
PBANKA_1009900	113549	2.73544	0.119831	22.8274	2.4512e-115	1.7366e-113
PBANKA_0804500	3322.05	2.72369	0.179024	15.2141	2.85151e-52	3.37484e-51
PBANKA_1028200	32140.7	2.71695	0.133753	20.3131	9.84256e-92	3.13793e-90
PBANKA_0915400	10141.3	2.7133	0.166555	16.2907	1.14877e-59	1.58805e-58
PBANKA_0306600	7525.01	2.71139	0.137163	19.7677	5.6497e-87	1.54942e-85
PBANKA_0923300	97203.5	2.70946	0.12532	21.6204	1.15551e-103	5.21617e-102
PBANKA_1338900	102038	2.70944	0.138049	19.6267	9.15071e-86	2.44386e-84
PBANKA_1335000	60511.2	2.70599	0.112838	23.9812	4.36555e-127	5.56716e-125
PBANKA_1040500	67.7146	2.70364	0.779658	3.46773	0.000524881	0.000898161
PBANKA_1414500	172571	2.70035	0.124884	21.6228	1.09643e-103	4.99367e-102
PBANKA_1300250	920.614	2.69899	0.256426	10.5254	6.5971e-26	3.64987e-25
PBANKA_1236200	1187.14	2.69857	0.207773	12.988	1.43081e-38	1.17151e-37
PBANKA_0214521	26.9697	2.69475	1.17235	2.29859	0.021528	0.0305804
PBANKA_1202600	53570.9	2.69314	0.127541	21.1158	5.69376e-99	2.20029e-97
PBANKA_1115000	87221.9	2.68463	0.114694	23.407	3.63067e-121	3.30715e-119
PBANKA_1417200	64783	2.67713	0.122831	21.7952	2.57396e-105	1.23866e-103
PBANKA_1436500	37516.5	2.676	0.127525	20.984	9.17763e-98	3.3924e-96
PBANKA_1109300	166404	2.67401	0.11426	23.4027	4.00812e-121	3.58692e-119
PBANKA_1434600	22178.4	2.67361	0.123566	21.6371	8.0352e-104	3.72614e-102
PBANKA_1461300	196406	2.67348	0.12148	22.0076	2.43304e-107	1.2928e-105
PBANKA_0512000	56827.6	2.67338	0.12382	21.5909	2.1848e-103	9.60747e-102
PBANKA_1213300	14927	2.6721	0.123844	21.5763	2.9996e-103	1.29669e-101
PBANKA_0402700	218078	2.67171	0.137599	19.4166	5.59106e-84	1.41891e-82
PBANKA_1103300	696.335	2.66823	0.267552	9.97277	2.00561e-23	1.02717e-22
PBANKA_0821400	53073.3	2.65868	0.136839	19.4292	4.37137e-84	1.12052e-82
PBANKA_1451100	50205.3	2.65611	0.116133	22.8713	8.97324e-116	6.44683e-114
PBANKA_1121000	10486.6	2.65252	0.131177	20.221	6.39972e-91	1.96656e-89
PBANKA_0902700	1978.73	2.65231	0.194476	13.6383	2.37131e-42	2.16001e-41
PBANKA_1414800	48088.9	2.65121	0.110616	23.9676	6.05085e-127	7.52814e-125
PBANKA_0704800	153404	2.65028	0.116791	22.6926	5.30697e-114	3.47062e-112
PBANKA_0712500	607.745	2.64567	0.271347	9.75014	1.8421e-22	9.09638e-22
PBANKA_1115300	301857	2.64262	0.120833	21.87	5.01211e-106	2.50655e-104
PBANKA_0927600	44521.5	2.64068	0.159808	16.5241	2.46016e-61	3.545e-60
PBANKA_1329900	177803	2.64015	0.158955	16.6094	5.95591e-62	8.68032e-61
PBANKA_1203800	7520.96	2.63775	0.139189	18.9509	4.34473e-80	9.93833e-79
PBANKA_1233700	2689.52	2.63489	0.191072	13.79	2.92585e-43	2.75873e-42
PBANKA_1460700	53041.2	2.63442	0.112178	23.4842	5.91395e-122	5.80135e-120
PBANKA_0502500	51827.1	2.6331	0.121988	21.5848	2.49474e-103	1.08766e-101
PBANKA_0707100	294226	2.63225	0.12828	20.5196	1.44004e-93	4.86466e-92
PBANKA_1204200	67921.3	2.62552	0.115472	22.7372	1.91984e-114	1.32339e-112
PBANKA_1436600	281922	2.62497	0.128448	20.4361	7.986e-93	2.66252e-91
PBANKA_0714000	314333	2.62369	0.129211	20.3055	1.15011e-91	3.64393e-90
PBANKA_0801800	36023.4	2.62125	0.114206	22.9519	1.40954e-116	1.07314e-114
PBANKA_0705600	83796.3	2.62114	0.131218	19.9754	9.00882e-89	2.6563e-87
PBANKA_0907100	86825	2.61958	0.135854	19.2823	7.56631e-83	1.82918e-81
PBANKA_0109900	33009.5	2.61426	0.118757	22.0136	2.13488e-107	1.14632e-105
PBANKA_1338100	240689	2.61207	0.120912	21.603	1.68145e-103	7.52375e-102
PBANKA_1329100	281328	2.61175	0.107442	24.3085	1.59387e-130	2.39127e-128
PBANKA_0713200	10121.7	2.61131	0.12194	21.4148	9.73054e-102	4.06848e-100
PBANKA_0409700	46934.3	2.60706	0.119293	21.8543	7.07516e-106	3.50392e-104
PBANKA_1110200	59733.1	2.60678	0.111187	23.4451	1.48398e-121	1.40181e-119
PBANKA_1145200	53752.1	2.60662	0.120697	21.5963	1.94616e-103	8.63248e-102
PBANKA_1239000	183518	2.60554	0.107243	24.2956	2.18067e-130	3.17818e-128
PBANKA_0910500	160.334	2.60476	0.534913	4.86949	1.11886e-06	2.43693e-06
PBANKA_1320800	188712	2.6028	0.134916	19.292	6.26658e-83	1.52218e-81
PBANKA_1106000	72948.8	2.60279	0.110482	23.5584	1.02986e-122	1.03006e-120
PBANKA_0932600	159114	2.60151	0.116724	22.2876	4.87387e-110	2.82518e-108
PBANKA_0812900	31478.4	2.60144	0.126474	20.5689	5.21579e-94	1.78562e-92
PBANKA_1202000	89990.9	2.60138	0.130182	19.9825	7.8152e-89	2.31775e-87
PBANKA_1017000	350.636	2.60091	0.364959	7.12657	1.02898e-12	3.27232e-12
PBANKA_1233600	257129	2.60088	0.118351	21.9759	4.89334e-107	2.54703e-105
PBANKA_1225500	86975.4	2.59871	0.12465	20.8481	1.58718e-96	5.66549e-95
PBANKA_1423700	37150.1	2.59658	0.121222	21.42	8.69079e-102	3.66378e-100
PBANKA_1129800	23331.8	2.59622	0.13054	19.8882	5.14544e-88	1.4501e-86
PBANKA_1101200	47678.7	2.59534	0.118091	21.9775	4.73239e-107	2.48865e-105
PBANKA_1009600	99130.3	2.59198	0.120611	21.4904	1.91503e-102	8.20889e-101
PBANKA_1355700	97577.5	2.59106	0.118985	21.7763	3.88921e-105	1.8541e-103
PBANKA_1019800	37809.8	2.59068	0.126049	20.553	7.24182e-94	2.4627e-92
PBANKA_1333700	53932.1	2.58645	0.117333	22.0436	1.10145e-107	5.97712e-106
PBANKA_0912500	22207.8	2.5734	0.133544	19.2701	9.57722e-83	2.30441e-81
PBANKA_0514900	852631	2.56929	0.143212	17.9405	5.69596e-72	1.03399e-70
PBANKA_1110600	15557.8	2.56736	0.132902	19.3178	3.80869e-83	9.29576e-82
PBANKA_0620300	104497	2.56542	0.108732	23.594	4.44537e-123	4.53516e-121
PBANKA_0205800	26439.3	2.56425	0.128512	19.9534	1.40065e-88	4.0827e-87
PBANKA_0514200	2165.75	2.56331	0.183208	13.9912	1.76344e-44	1.72655e-43
PBANKA_1353800	261133	2.56305	0.115181	22.2524	1.06905e-109	6.12725e-108
PBANKA_0700071	854.083	2.56124	0.274385	9.33446	1.01508e-20	4.63972e-20
PBANKA_1430300	218029	2.56086	0.118353	21.6374	7.99652e-104	3.72614e-102
PBANKA_1317200	107904	2.55795	0.114271	22.385	5.50874e-111	3.38555e-109
PBANKA_0615300	131327	2.55583	0.128584	19.8767	6.4789e-88	1.81587e-86
PBANKA_1334700	46014.2	2.55337	0.128596	19.8558	9.81862e-88	2.73687e-86
PBANKA_1311400	47693.8	2.55042	0.116845	21.8273	1.27819e-105	6.26929e-104
PBANKA_1108500	32785.5	2.55021	0.119834	21.2811	1.69813e-100	6.82062e-99
PBANKA_0503300	60872.8	2.54976	0.110394	23.0968	4.98745e-118	4.10338e-116
PBANKA_1229900	76107.3	2.54903	0.116848	21.815	1.67191e-105	8.12231e-104
PBANKA_1120400	209920	2.54484	0.128834	19.7529	7.57715e-87	2.0669e-85
PBANKA_0001101	146.268	2.54444	0.545449	4.66486	3.08826e-06	6.53119e-06
PBANKA_0317161	4386.3	2.53597	0.156011	16.255	2.05773e-59	2.82924e-58
PBANKA_0504400	124924	2.53325	0.12014	21.0857	1.07509e-98	4.12332e-97
PBANKA_0518500	23061.5	2.53204	0.130736	19.3677	1.44671e-83	3.63531e-82
PBANKA_1143400	35545.7	2.531	0.121752	20.7882	5.5294e-96	1.95871e-94
PBANKA_0617800	3845.45	2.52418	0.14732	17.134	8.27972e-66	1.36682e-64
PBANKA_0830400	149412	2.52191	0.119618	21.083	1.13816e-98	4.33264e-97
PBANKA_1212500	1312.62	2.51641	0.199739	12.5985	2.15214e-36	1.68117e-35
PBANKA_1232600	23660.8	2.51293	0.132156	19.0148	1.28513e-80	3.00709e-79
PBANKA_1329400	128360	2.51266	0.107202	23.4385	1.73321e-121	1.60748e-119
PBANKA_0720900	302627	2.49203	0.111227	22.4049	3.52599e-111	2.19342e-109
PBANKA_1023100	2484.17	2.49193	0.167937	14.8385	8.26152e-50	9.22145e-49
PBANKA_0102900	2418.02	2.49023	0.183225	13.5911	4.52341e-42	4.10567e-41
PBANKA_0800100	2127.51	2.48941	0.190533	13.0655	5.18407e-39	4.32091e-38
PBANKA_0603300	90058.9	2.48764	0.132351	18.7959	8.16236e-79	1.81818e-77
PBANKA_1204500	83037.6	2.48394	0.118421	20.9755	1.0984e-97	4.0309e-96
PBANKA_0513700	191.176	2.47985	0.455029	5.44987	5.04068e-08	1.20264e-07
PBANKA_1365700	1572.59	2.47974	0.200072	12.3942	2.80817e-35	2.13798e-34
PBANKA_0906800	385.509	2.47936	0.327601	7.56823	3.78354e-14	1.30316e-13
PBANKA_1313100	27107.8	2.4787	0.123587	20.0563	1.77802e-89	5.30391e-88
PBANKA_0824200	3939.37	2.47754	0.154375	16.0488	5.82957e-58	7.88771e-57
PBANKA_0800200	2439.49	2.47512	0.185562	13.3385	1.38154e-40	1.19647e-39
PBANKA_1119200	5377.14	2.4751	0.147106	16.8253	1.59247e-63	2.38918e-62
PBANKA_0600251	613.019	2.47397	0.30886	8.01001	1.14698e-15	4.252e-15
PBANKA_1323900	16026.4	2.46919	0.12171	20.2874	1.66027e-91	5.19574e-90
PBANKA_1012700	2472.47	2.46439	0.161439	15.2651	1.306e-52	1.56383e-51
PBANKA_1422800	1648	2.46429	0.196954	12.512	6.41499e-36	4.97308e-35
PBANKA_1124000	12086.4	2.46387	0.12252	20.11	6.02984e-90	1.82001e-88
PBANKA_0612400	296982	2.46358	0.12072	20.4074	1.43807e-92	4.70232e-91
PBANKA_0606200	394578	2.46164	0.120546	20.4207	1.09442e-92	3.60169e-91
PBANKA_1449300	12739	2.46005	0.136539	18.0172	1.42792e-72	2.64866e-71
PBANKA_1104100	90036.6	2.45945	0.110598	22.2376	1.48613e-109	8.42305e-108
PBANKA_1334900	130750	2.45575	0.123427	19.8963	4.37931e-88	1.24798e-86
PBANKA_1128800	205130	2.45303	0.129274	18.9755	2.72079e-80	6.30852e-79
PBANKA_1346300	28502.8	2.45058	0.118142	20.7427	1.42681e-95	5.01942e-94
PBANKA_1428980	32.8906	2.44953	1.07504	2.27856	0.0226933	0.032075
PBANKA_0104500	27474.1	2.44817	0.1267	19.3226	3.46946e-83	8.50851e-82
PBANKA_0316900	147.904	2.44786	0.526487	4.64942	3.32864e-06	7.01628e-06
PBANKA_0937500	26648.5	2.44376	0.116106	21.0477	2.40258e-98	8.94567e-97
PBANKA_0523800	929.264	2.43959	0.290776	8.38995	4.86337e-17	1.91568e-16
PBANKA_1120200	4458.99	2.43576	0.146171	16.6638	2.40283e-62	3.53223e-61
PBANKA_0106300	49083.8	2.42262	0.110551	21.9141	1.90783e-106	9.6355e-105
PBANKA_0821200	98664.8	2.41847	0.114736	21.0785	1.25299e-98	4.73443e-97
PBANKA_1000451	37.8853	2.41732	1.12117	2.15608	0.0310775	0.0429727
PBANKA_1210600	2878.38	2.41438	0.160799	15.0148	5.87065e-51	6.77516e-50
PBANKA_0516000	47997.5	2.41428	0.129699	18.6145	2.45345e-77	5.28062e-76
PBANKA_0920500	12441.5	2.41393	0.138616	17.4145	6.40546e-68	1.10014e-66
PBANKA_1020800	4175.61	2.41365	0.154922	15.5798	9.99343e-55	1.25558e-53
PBANKA_1246700	761.963	2.41068	0.272398	8.84986	8.76272e-19	3.69105e-18
PBANKA_1364700	18359.6	2.41045	0.117029	20.597	2.92127e-94	1.0137e-92
PBANKA_0825900	24931.3	2.40836	0.120934	19.9146	3.03926e-88	8.7589e-87
PBANKA_0523900	143874	2.40792	0.12963	18.5754	5.08273e-77	1.08481e-75
PBANKA_0721800	2080.94	2.40603	0.207888	11.5737	5.60264e-31	3.72123e-30
PBANKA_1318600	246172	2.40198	0.140573	17.0871	1.8517e-65	3.01774e-64
PBANKA_0417200	223701	2.40111	0.133872	17.9359	6.18844e-72	1.11941e-70
PBANKA_0943400	360630	2.40064	0.129783	18.4973	2.17024e-76	4.55571e-75
PBANKA_0719800	34680.5	2.39634	0.114349	20.9563	1.64462e-97	5.99228e-96
PBANKA_0316981	90.3943	2.39541	0.650641	3.68161	0.000231765	0.000411927
PBANKA_0301000	17356.3	2.39338	0.117153	20.4296	9.12253e-93	3.02169e-91
PBANKA_0600200	421.882	2.39142	0.371202	6.44237	1.17624e-10	3.32779e-10
PBANKA_0932500	251046	2.38982	0.125988	18.9686	3.10147e-80	7.15864e-79
PBANKA_1206000	23234	2.38836	0.124563	19.1739	6.11455e-82	1.46433e-80
PBANKA_1421241	83.2815	2.38817	0.68429	3.49	0.00048303	0.000828491
PBANKA_0819000	40986.7	2.38788	0.123443	19.3441	2.28735e-83	5.6916e-82
PBANKA_1212200	2421.52	2.38697	0.194314	12.2841	1.10253e-34	8.22226e-34
PBANKA_0823100	63800.7	2.38621	0.115954	20.579	4.23321e-94	1.45903e-92
PBANKA_1035400	82729.2	2.38267	0.143813	16.5678	1.19187e-61	1.73212e-60
PBANKA_1410950	1768.05	2.37637	0.184376	12.8887	5.2106e-38	4.19893e-37
PBANKA_0001001	4342.16	2.37341	0.159032	14.9241	2.29673e-50	2.59769e-49
PBANKA_0201700	1443.51	2.37231	0.213885	11.0915	1.37944e-28	8.44723e-28
PBANKA_1225400	793.603	2.37197	0.243742	9.73147	2.2137e-22	1.08892e-21
PBANKA_1309600	347.134	2.37084	0.372361	6.36706	1.92688e-10	5.37399e-10
PBANKA_1351400	2690.86	2.37008	0.164968	14.3669	8.34355e-47	8.63295e-46
PBANKA_1007900	43323.9	2.36406	0.116032	20.3743	2.8299e-92	9.19446e-91
PBANKA_1124700	2810.71	2.36205	0.164353	14.3718	7.78016e-47	8.06638e-46
PBANKA_1231300	130739	2.36082	0.118394	19.9404	1.81787e-88	5.26873e-87
PBANKA_1303900	59710.7	2.35533	0.125942	18.7017	4.79204e-78	1.04018e-76
PBANKA_1439100	189382	2.3552	0.11886	19.815	2.21225e-87	6.13297e-86
PBANKA_1421700	129257	2.35462	0.122883	19.1614	7.76996e-82	1.84347e-80
PBANKA_0307500	414.835	2.34873	0.356917	6.58061	4.68507e-11	1.35942e-10
PBANKA_1453000	19682.6	2.34827	0.12088	19.4265	4.6083e-84	1.17535e-82
PBANKA_0311500	8011.58	2.34767	0.138692	16.9272	2.83403e-64	4.35434e-63
PBANKA_0706700	37708	2.34693	0.128297	18.2929	9.42964e-75	1.85002e-73
PBANKA_1415400	51507.3	2.3457	0.111961	20.951	1.83556e-97	6.64058e-96
PBANKA_1233500	7992.58	2.34535	0.142388	16.4716	5.86919e-61	8.38621e-60
PBANKA_1119600	162.566	2.34249	0.499912	4.68581	2.78859e-06	5.92199e-06
PBANKA_1241400	423.299	2.34134	0.386458	6.05848	1.37417e-09	3.6604e-09
PBANKA_0906100	917.312	2.33471	0.276928	8.43075	3.43457e-17	1.36553e-16
PBANKA_1006200	1971.91	2.32771	0.175028	13.2991	2.34271e-40	2.0152e-39
PBANKA_1114100	93571.2	2.32483	0.111513	20.848	1.58825e-96	5.66549e-95
PBANKA_1429200	29193.8	2.32337	0.126494	18.3675	2.39307e-75	4.80792e-74
PBANKA_0807200	48853.9	2.31861	0.125538	18.4694	3.6435e-76	7.61701e-75
PBANKA_0508300	3372.36	2.31456	0.199817	11.5834	5.00432e-31	3.33251e-30
PBANKA_1146200	311.295	2.31107	0.414307	5.57815	2.43088e-08	5.92448e-08
PBANKA_1205100	115547	2.3088	0.126795	18.2089	4.38609e-74	8.4748e-73
PBANKA_1117600	966.047	2.30778	0.245079	9.41647	4.66518e-21	2.15164e-20
PBANKA_1355900	44076	2.30543	0.135976	16.9546	1.77858e-64	2.75762e-63
PBANKA_0110800	21815.6	2.30528	0.146147	15.7737	4.72273e-56	6.12993e-55
PBANKA_1352500	109614	2.30519	0.123243	18.7045	4.54832e-78	9.91495e-77
PBANKA_1315300	100396	2.30185	0.108547	21.2059	8.42502e-100	3.28061e-98
PBANKA_1218300	27402.7	2.30044	0.118561	19.403	7.28252e-84	1.83902e-82
PBANKA_1123200	84196	2.30034	0.125726	18.2965	8.82487e-75	1.73806e-73
PBANKA_1342300	11354.9	2.29931	0.127623	18.0164	1.44754e-72	2.67533e-71
PBANKA_0515000	1.5632e+06	2.29845	0.113508	20.2492	3.61219e-91	1.11671e-89
PBANKA_1100781	156.922	2.29518	0.521375	4.40217	1.07172e-05	2.1523e-05
PBANKA_1114200	35997.8	2.29481	0.122815	18.685	6.55639e-78	1.41713e-76
PBANKA_0815400	172924	2.29432	0.118007	19.4422	3.39547e-84	8.79203e-83
PBANKA_0912400	8138.91	2.2919	0.16753	13.6805	1.32701e-42	1.22406e-41
PBANKA_1002300	525.585	2.29184	0.287365	7.97538	1.51912e-15	5.61118e-15
PBANKA_0608000	3391.14	2.29173	0.157177	14.5806	3.73455e-48	4.03601e-47
PBANKA_1240100	23101.9	2.29117	0.115201	19.8884	5.13227e-88	1.4501e-86
PBANKA_0927300	11231.5	2.2896	0.162336	14.1041	3.58374e-45	3.56348e-44
PBANKA_0917100	1657.29	2.28926	0.191715	11.941	7.23676e-33	5.02241e-32
PBANKA_0600100	460.141	2.28886	0.328907	6.95899	3.42722e-12	1.06082e-11
PBANKA_1363600	76767.4	2.28808	0.123655	18.5037	1.92767e-76	4.0801e-75
PBANKA_1437700	248113	2.28643	0.123329	18.5394	9.94126e-77	2.11293e-75
PBANKA_1342300.2	326124	2.28366	0.117472	19.4401	3.53403e-84	9.10459e-83
PBANKA_0837181	69.8176	2.28317	0.807982	2.82577	0.00471675	0.00726893
PBANKA_0310700	21766.9	2.27917	0.114524	19.9012	3.97224e-88	1.13834e-86
PBANKA_0108300	7417.25	2.27717	0.131216	17.3544	1.82786e-67	3.10797e-66
PBANKA_0600051	2945.84	2.27691	0.156252	14.572	4.2331e-48	4.56513e-47
PBANKA_0712900	214337	2.27673	0.153286	14.8529	6.66517e-50	7.45592e-49
PBANKA_1319500	140501	2.27665	0.139258	16.3485	4.45861e-60	6.24818e-59
PBANKA_1143800	19439.6	2.27277	0.119973	18.9441	4.94305e-80	1.12565e-78
PBANKA_1102100	13735.3	2.27043	0.133211	17.0438	3.88692e-65	6.23497e-64
PBANKA_0307600	12027.4	2.26884	0.147044	15.4297	1.03369e-53	1.27364e-52
PBANKA_0522300	4497.56	2.26687	0.869612	2.60676	0.00914034	0.013625
PBANKA_0312700	85684.6	2.26351	0.12039	18.8014	7.35329e-79	1.65239e-77
PBANKA_1218000	24112.1	2.26113	0.114692	19.7148	1.6081e-86	4.34016e-85
PBANKA_0514300	18789.8	2.25946	0.141272	15.9937	1.41368e-57	1.89768e-56
PBANKA_1432300	6971.39	2.25908	0.134176	16.8367	1.31336e-63	1.98209e-62
PBANKA_0314800	6907.24	2.25904	0.137385	16.4431	9.39796e-61	1.33908e-59
PBANKA_1435900	531.694	2.25865	0.303847	7.43353	1.05741e-13	3.55795e-13
PBANKA_1008300	19340.2	2.25477	0.115913	19.4522	2.79048e-84	7.26236e-83
PBANKA_1353400	3562.89	2.25218	0.157287	14.3189	1.66758e-46	1.71154e-45
PBANKA_1134600	391.538	2.25111	0.378377	5.94938	2.69166e-09	6.98735e-09
PBANKA_0939000	40247.1	2.25094	0.119973	18.7621	1.54297e-78	3.40722e-77
PBANKA_1360400	212882	2.24774	0.130261	17.2557	1.01467e-66	1.68594e-65
PBANKA_1353100	19070.3	2.24666	0.122675	18.314	6.40411e-75	1.2711e-73
PBANKA_1138600	71943.6	2.24306	0.131859	17.0111	6.79456e-65	1.06972e-63
PBANKA_0522200	9089.64	2.24263	0.129039	17.3794	1.18134e-67	2.02215e-66
PBANKA_1228300	36421	2.23562	0.140009	15.9677	2.14662e-57	2.86647e-56
PBANKA_0703300	25999.7	2.23284	0.146435	15.248	1.69743e-52	2.02304e-51
PBANKA_0408300	10306.1	2.23217	0.121819	18.3237	5.35813e-75	1.06765e-73
PBANKA_1325400	46720.1	2.23167	0.113708	19.6263	9.21173e-86	2.44735e-84
PBANKA_1019900	950.475	2.23051	0.242628	9.19312	3.81619e-20	1.69782e-19
PBANKA_0703500	55881.5	2.22548	0.110644	20.114	5.56749e-90	1.69046e-88
PBANKA_1424500	16145.9	2.22391	0.130214	17.0789	2.12984e-65	3.449e-64
PBANKA_0109800	25134.3	2.2238	0.128151	17.3529	1.87377e-67	3.17545e-66
PBANKA_0701900	939.087	2.22301	0.230626	9.63903	5.47035e-22	2.64495e-21
PBANKA_0513000	3887.17	2.22163	0.148157	14.9951	7.90175e-51	9.07812e-50
PBANKA_0206700	1174.01	2.22001	0.207751	10.6859	1.18487e-26	6.75311e-26
PBANKA_0105100	98255	2.21897	0.124141	17.8746	1.85938e-71	3.33968e-70
PBANKA_1318500	50166.7	2.21383	0.110867	19.9683	1.0383e-88	3.04388e-87
PBANKA_0704900	138701	2.20952	0.111633	19.7927	3.44279e-87	9.4928e-86
PBANKA_0502650	66040.8	2.2078	0.108445	20.3587	3.88464e-92	1.25415e-90
PBANKA_0816300	8864.82	2.20636	0.131205	16.8161	1.86073e-63	2.78345e-62
PBANKA_1346900	1486.77	2.20388	0.219383	10.0458	9.5822e-24	4.95226e-23
PBANKA_1020000	4837.63	2.19924	0.144217	15.2495	1.6584e-52	1.98115e-51
PBANKA_0709600	21027.2	2.19719	0.119071	18.4528	4.94916e-76	1.02209e-74
PBANKA_1225300	21152.8	2.19406	0.114508	19.1608	7.86553e-82	1.8575e-80
PBANKA_0201051	93.8063	2.19384	0.643213	3.41075	0.000647842	0.00109862
PBANKA_0938200	3217.02	2.19119	0.159076	13.7745	3.62871e-43	3.39012e-42
PBANKA_1325100	6568.29	2.18889	0.136501	16.0357	7.1944e-58	9.70863e-57
PBANKA_1450800	2302.69	2.18807	0.167987	13.0253	8.79081e-39	7.25597e-38
PBANKA_1106500	52887.6	2.1871	0.128478	17.0231	5.53236e-65	8.79145e-64
PBANKA_0203600	47856.3	2.18512	0.120658	18.11	2.65832e-73	5.04092e-72
PBANKA_0620400	94516.9	2.18503	0.124757	17.5143	1.11439e-68	1.93351e-67
PBANKA_1027000	33903.7	2.18078	0.127759	17.0694	2.50822e-65	4.04886e-64
PBANKA_1357900	36730.7	2.174	0.128584	16.9072	3.97935e-64	6.07744e-63
PBANKA_1453100	41458.7	2.17356	0.120355	18.0595	6.6366e-73	1.24005e-71
PBANKA_0417600	19546.6	2.17211	0.122814	17.6861	5.36168e-70	9.46365e-69
PBANKA_1018100	13392.7	2.17002	0.128452	16.8936	5.01065e-64	7.62965e-63
PBANKA_1040100	43942.7	2.16938	0.114417	18.9603	3.63341e-80	8.34866e-79
PBANKA_0904600	9270.48	2.16629	0.125182	17.3051	4.3026e-67	7.2196e-66
PBANKA_0512500	7743.92	2.16607	0.141082	15.3533	3.36797e-53	4.11005e-52
PBANKA_0110500	45545.2	2.16567	0.134343	16.1204	1.83317e-58	2.50027e-57
PBANKA_0203750	10815	2.1646	0.150039	14.4269	3.50573e-47	3.69478e-46
PBANKA_0918600	13961.3	2.16121	0.118773	18.1962	5.53192e-74	1.06484e-72
PBANKA_1410100	42997.6	2.15969	0.111711	19.3327	2.84922e-83	7.02118e-82
PBANKA_1240700	16766.5	2.15151	0.126148	17.0554	3.18617e-65	5.12702e-64
PBANKA_0204600	4908.97	2.15132	0.138739	15.5062	3.14982e-54	3.91884e-53
PBANKA_1125900	24370.1	2.1509	0.11681	18.4137	1.01975e-75	2.0858e-74
PBANKA_0612900	4650.86	2.14894	0.469616	4.57595	4.74057e-06	9.862e-06
PBANKA_0932000	4080.96	2.14855	0.199073	10.7928	3.72196e-27	2.15502e-26
PBANKA_1237600	20604.8	2.14785	0.124053	17.3139	3.69418e-67	6.21915e-66
PBANKA_1353900	7606.38	2.14608	0.155217	13.8263	1.76951e-43	1.68401e-42
PBANKA_1200400	2155.31	2.14348	0.196011	10.9355	7.79597e-28	4.65114e-27
PBANKA_1415200	27207.4	2.14236	0.126275	16.9658	1.47043e-64	2.29378e-63
PBANKA_0939300	5133.48	2.13849	0.165609	12.9129	3.80618e-38	3.0818e-37
PBANKA_1453400	5271.25	2.13678	0.150791	14.1704	1.39616e-45	1.41026e-44
PBANKA_1219100	63216.1	2.13233	0.118345	18.0178	1.41221e-72	2.62908e-71
PBANKA_1310700	22292.4	2.13126	0.123236	17.294	5.21712e-67	8.72541e-66
PBANKA_1002400	991.8	2.13095	0.237357	8.97779	2.76251e-19	1.19521e-18
PBANKA_0605800	93790.5	2.13042	0.12125	17.5705	4.14376e-69	7.23881e-68
PBANKA_1309800	4486.62	2.12452	0.147747	14.3795	6.96306e-47	7.26351e-46
PBANKA_0303500	18782.6	2.11765	0.131101	16.1528	1.08533e-58	1.48425e-57
PBANKA_0904200	22591.2	2.11765	0.125468	16.878	6.5366e-64	9.89412e-63
PBANKA_1352100	45110.3	2.11232	0.116233	18.1732	8.41342e-74	1.61342e-72
PBANKA_1025300	2115.68	2.11076	0.177774	11.8733	1.6296e-32	1.11729e-31
PBANKA_1361200	57376	2.11022	0.117566	17.9493	4.8597e-72	8.88507e-71
PBANKA_0812600	128448	2.10981	0.109115	19.3356	2.69429e-83	6.67164e-82
PBANKA_1245500	3781.66	2.10895	0.146836	14.3626	8.88406e-47	9.15507e-46
PBANKA_1243500	89717.7	2.10837	0.123828	17.0266	5.21474e-65	8.31262e-64
PBANKA_1358500	1372.61	2.10702	0.207544	10.1522	3.24073e-24	1.70247e-23
PBANKA_1332800	12688.5	2.1062	0.143858	14.6408	1.54266e-48	1.68503e-47
PBANKA_1006300	2076.41	2.10503	0.174974	12.0306	2.45479e-33	1.73915e-32
PBANKA_0521500	942.721	2.10402	0.23633	8.90289	5.44117e-19	2.32457e-18
PBANKA_0921700	31059.5	2.10159	0.152802	13.7536	4.8451e-43	4.51825e-42
PBANKA_0112200	1662.7	2.09539	0.198263	10.5687	4.16027e-26	2.32183e-25
PBANKA_1015400	114694	2.08933	0.126742	16.4849	4.71033e-61	6.74927e-60
PBANKA_1451200	3016.83	2.08458	0.158123	13.1832	1.09606e-39	9.21086e-39
PBANKA_0902900	471384	2.08053	0.113796	18.283	1.13047e-74	2.2094e-73
PBANKA_0813300	16386.2	2.06764	0.126656	16.3248	6.57523e-60	9.164e-59
PBANKA_1031700	1266.3	2.06707	0.211467	9.77492	1.44267e-22	7.15863e-22
PBANKA_1351500	929.445	2.06454	0.250423	8.24424	1.66219e-16	6.37507e-16
PBANKA_0209700	5624.23	2.06434	0.136933	15.0756	2.3452e-51	2.73125e-50
PBANKA_0603650	4346.99	2.06291	0.143058	14.4201	3.86617e-47	4.06626e-46
PBANKA_1325200	28874.1	2.06196	0.123824	16.6524	2.90801e-62	4.26258e-61
PBANKA_1001700	503.911	2.06023	0.321514	6.40791	1.47529e-10	4.14626e-10
PBANKA_0510100	25710	2.05804	0.12103	17.0044	7.62338e-65	1.19285e-63
PBANKA_0110900	4596.68	2.0578	0.146894	14.0088	1.37749e-44	1.35127e-43
PBANKA_1305500	5394.73	2.05489	0.145093	14.1625	1.56243e-45	1.57198e-44
PBANKA_1028700	65924.1	2.05344	0.123448	16.634	3.95124e-62	5.77515e-61
PBANKA_0623150	17085.5	2.0523	0.132479	15.4916	3.95544e-54	4.90918e-53
PBANKA_0800300	2705.5	2.05166	0.189276	10.8395	2.23623e-27	1.30814e-26
PBANKA_0103200	52334.5	2.04515	0.140496	14.5566	5.30036e-48	5.70403e-47
PBANKA_0502800	7055.31	2.04448	0.149329	13.6911	1.14711e-42	1.06196e-41
PBANKA_0711600	419.454	2.04401	0.337678	6.05313	1.42061e-09	3.77817e-09
PBANKA_0938800	19642	2.0429	0.12065	16.9325	2.59167e-64	3.99399e-63
PBANKA_0712200	114704	2.03905	0.129598	15.7336	8.89451e-56	1.14573e-54
PBANKA_1316100	21754.1	2.03846	0.120491	16.9179	3.32066e-64	5.08669e-63
PBANKA_1416500	626.444	2.03608	0.293697	6.9326	4.13162e-12	1.27267e-11
PBANKA_0701200	4882.61	2.03498	0.157373	12.931	3.00967e-38	2.44854e-37
PBANKA_1101400	9663.28	2.03025	0.124493	16.3082	8.63577e-60	1.19704e-58
PBANKA_1021100	4903.83	2.02987	0.150382	13.4981	1.60475e-41	1.42859e-40
PBANKA_1137400	70027.2	2.02577	0.112074	18.0753	4.98694e-73	9.38685e-72
PBANKA_0929400	32164.4	2.02501	0.129714	15.6114	6.09119e-55	7.76779e-54
PBANKA_0514800	7201.65	2.02443	0.131971	15.34	4.12995e-53	5.01593e-52
PBANKA_0102100	9231.94	2.0242	0.131544	15.388	1.97057e-53	2.41632e-52
PBANKA_1120300	352.973	2.02141	0.4024	5.02338	5.07698e-07	1.13487e-06
PBANKA_0904000	4635.46	2.01795	0.147223	13.7068	9.24917e-43	8.59381e-42
PBANKA_0410650	860.634	2.01594	0.286929	7.02592	2.12655e-12	6.65494e-12
PBANKA_1465000	285.509	2.01435	0.396489	5.08047	3.76498e-07	8.4941e-07
PBANKA_0908400	1305.93	2.01177	0.206295	9.75192	1.81011e-22	8.94709e-22
PBANKA_0510300	58339.1	2.00921	0.118111	17.0112	6.78377e-65	1.06972e-63
PBANKA_1345900	1417.33	2.00912	0.193518	10.3821	2.99049e-25	1.62282e-24
PBANKA_1400100	1486.97	2.00803	0.189166	10.6152	2.53195e-26	1.42084e-25
PBANKA_1241100	8614.15	2.00611	0.128977	15.554	1.49554e-54	1.87439e-53
PBANKA_0812200	7405.37	2.00348	0.147149	13.6153	3.24856e-42	2.95382e-41
PBANKA_1445700	26941.9	1.99758	0.130768	15.2758	1.10856e-52	1.33682e-51
PBANKA_1419300	82262.5	1.99553	0.11114	17.955	4.38517e-72	8.04632e-71
PBANKA_0817100	12997.3	1.99034	0.125376	15.8749	9.45113e-57	1.24897e-55
PBANKA_0909400	3254.5	1.98905	0.150507	13.2156	7.12977e-40	6.04136e-39
PBANKA_0511700	54006.1	1.98569	0.112236	17.6921	4.82182e-70	8.54031e-69
PBANKA_1040151	491.312	1.98046	0.290914	6.80773	9.91537e-12	2.99103e-11
PBANKA_1204100	9542.66	1.97967	0.126006	15.711	1.27161e-55	1.63388e-54
PBANKA_1338200	8647.36	1.97602	0.148493	13.3071	2.10369e-40	1.81572e-39
PBANKA_1038400	19610	1.97455	0.130212	15.1642	6.10633e-52	7.19363e-51
PBANKA_1242100	10021.5	1.97315	0.143116	13.787	3.05031e-43	2.86549e-42
PBANKA_1311300	7615.19	1.97113	0.129547	15.2155	2.79016e-52	3.30991e-51
PBANKA_1100351	292.862	1.96874	0.366112	5.37743	7.5558e-08	1.78271e-07
PBANKA_1100860	15569.2	1.96752	0.13561	14.5087	1.0668e-47	1.13606e-46
PBANKA_1331700	1366.85	1.96599	0.201148	9.77383	1.45828e-22	7.22904e-22
PBANKA_1109900	22251.4	1.96592	0.124731	15.7613	5.74697e-56	7.44043e-55
PBANKA_0316861	770.346	1.96269	0.294351	6.66786	2.59551e-11	7.64418e-11
PBANKA_1363700	1561.8	1.95933	0.20399	9.60505	7.61223e-22	3.67361e-21
PBANKA_0215700	75.3999	1.95684	0.807385	2.42367	0.0153644	0.0222336
PBANKA_0503800	7569.37	1.95658	0.133385	14.6687	1.02301e-48	1.12223e-47
PBANKA_0922600	1347.29	1.95511	0.205439	9.5167	1.78759e-21	8.39642e-21
PBANKA_1138100	8113.85	1.95045	0.159971	12.1925	3.40726e-34	2.51163e-33
PBANKA_1330700	16276.2	1.94933	0.117747	16.5552	1.46742e-61	2.12651e-60
PBANKA_0911500	6256.54	1.94651	0.139433	13.9602	2.72792e-44	2.65556e-43
PBANKA_1318800	31586.5	1.94247	0.113494	17.1152	1.14273e-65	1.87429e-64
PBANKA_0605100	24727.9	1.93829	0.143188	13.5366	9.50883e-42	8.53954e-41
PBANKA_1246161	41292.1	1.93495	0.110468	17.5159	1.08403e-68	1.88724e-67
PBANKA_0824400	35243.3	1.93214	0.122738	15.742	7.79276e-56	1.00635e-54
PBANKA_1436300	41528.1	1.92237	0.123797	15.5285	2.22615e-54	2.78323e-53
PBANKA_0400700	85.6999	1.9167	0.792971	2.41711	0.0156442	0.0226194
PBANKA_0100061	1464.31	1.91656	0.204739	9.361	7.89851e-21	3.61672e-20
PBANKA_1419400	3202.58	1.91539	0.168834	11.3448	7.86944e-30	5.03664e-29
PBANKA_1403700	7581.41	1.91534	0.126433	15.149	7.69009e-52	9.01774e-51
PBANKA_1210200	147090	1.91305	0.142716	13.4046	5.68648e-41	4.98397e-40
PBANKA_0101800	30153.5	1.91144	0.119283	16.0244	8.63454e-58	1.16213e-56
PBANKA_1238500	2978.07	1.91129	0.167908	11.383	5.08398e-30	3.27028e-29
PBANKA_1310000	2347.27	1.91062	0.173041	11.0415	2.41104e-28	1.46413e-27
PBANKA_1145731	47.6873	1.90879	0.863258	2.21115	0.0270255	0.0376762
PBANKA_1146700	678.076	1.90709	0.2587	7.37184	1.68285e-13	5.59234e-13
PBANKA_0936000	14653.7	1.90536	0.137119	13.8956	6.73181e-44	6.49129e-43
PBANKA_0512400	5469.07	1.90073	0.146549	12.9699	1.81242e-38	1.48159e-37
PBANKA_1449800	7986.7	1.89873	0.12882	14.7394	3.601e-49	3.98453e-48
PBANKA_1112800	8746.65	1.89868	0.13376	14.1946	9.89148e-46	1.00311e-44
PBANKA_1439300	7481.2	1.89804	0.130697	14.5225	8.73139e-48	9.33728e-47
PBANKA_1354351	429.523	1.89499	0.31823	5.95478	2.60424e-09	6.77076e-09
PBANKA_1203600	114.923	1.88866	0.589431	3.20421	0.00135435	0.0022257
PBANKA_0818300	423.949	1.88633	0.391999	4.81209	1.49358e-06	3.22966e-06
PBANKA_1361400	1380.51	1.88616	0.246379	7.65552	1.92533e-14	6.69925e-14
PBANKA_1112000	113.48	1.88401	0.588711	3.20023	0.00137318	0.00225519
PBANKA_1231900	245.53	1.87943	0.446098	4.21303	2.51963e-05	4.88321e-05
PBANKA_0309500	969.697	1.87569	0.24959	7.51509	5.68698e-14	1.94172e-13
PBANKA_1004500	10957.8	1.86653	0.139184	13.4105	5.24883e-41	4.61626e-40
PBANKA_0704400	7908.54	1.86427	0.126693	14.7148	5.17793e-49	5.69238e-48
PBANKA_0110700	1650.36	1.86386	0.285846	6.52048	7.00826e-11	2.00725e-10
PBANKA_1002500	6083.56	1.8638	0.144196	12.9254	3.23424e-38	2.62705e-37
PBANKA_0402500	52472.2	1.86181	0.109764	16.962	1.57043e-64	2.4423e-63
PBANKA_1362800	6566.98	1.86005	0.142717	13.0331	7.92957e-39	6.56635e-38
PBANKA_0500950	127.686	1.85986	0.815437	2.28081	0.0225597	0.0319215
PBANKA_0827300	1350.82	1.8579	0.19486	9.53456	1.50523e-21	7.11603e-21
PBANKA_1357700	11157.5	1.85765	0.13342	13.9233	4.57502e-44	4.4283e-43
PBANKA_1453900	9989.79	1.85673	0.138626	13.3938	6.57337e-41	5.75142e-40
PBANKA_0833300	2819.44	1.85528	0.160893	11.5311	9.19302e-31	6.0743e-30
PBANKA_1460500	1224.89	1.85396	0.209715	8.84039	9.53815e-19	4.01106e-18
PBANKA_0703000	475.946	1.85153	0.298736	6.19789	5.72246e-10	1.55598e-09
PBANKA_1202700	69568.6	1.84569	0.133845	13.7897	2.93823e-43	2.7653e-42
PBANKA_1457700	792.154	1.84062	0.249309	7.38287	1.5491e-13	5.16467e-13
PBANKA_0600351	615.798	1.84001	0.264264	6.96277	3.33649e-12	1.03336e-11
PBANKA_1425800	1405.87	1.83966	0.257545	7.14305	9.12826e-13	2.91202e-12
PBANKA_1458800	9473.27	1.83849	0.125862	14.6072	2.52514e-48	2.74642e-47
PBANKA_0818400	1620.69	1.83754	0.186643	9.84524	7.18704e-23	3.62622e-22
PBANKA_1404300	505.05	1.83579	0.317467	5.78263	7.35412e-09	1.85343e-08
PBANKA_1039000	14974.8	1.82981	0.121718	15.0332	4.45175e-51	5.161e-50
PBANKA_0702700	16798.3	1.82918	0.129956	14.0754	5.38277e-45	5.33156e-44
PBANKA_1138200	41615.7	1.82839	0.138945	13.1591	1.50952e-39	1.26646e-38
PBANKA_0510800	6035.06	1.82831	0.153554	11.9067	1.09251e-32	7.53097e-32
PBANKA_1246400	3090.39	1.82178	0.154703	11.776	5.18847e-32	3.51947e-31
PBANKA_1146261	180.862	1.8214	0.461132	3.94985	7.81996e-05	0.000145317
PBANKA_0835400	4623.2	1.8163	0.161554	11.2427	2.51657e-29	1.57897e-28
PBANKA_1227000	7541.47	1.81596	0.140429	12.9315	2.98927e-38	2.43582e-37
PBANKA_0813600	2182.78	1.81391	0.191598	9.46726	2.87271e-21	1.3358e-20
PBANKA_0714500	2379.56	1.81253	0.171852	10.547	5.24229e-26	2.91295e-25
PBANKA_1224500	8972.8	1.81248	0.125499	14.4421	2.81151e-47	2.96926e-46
PBANKA_1406400	5490.53	1.81073	0.146573	12.3538	4.64662e-35	3.51668e-34
PBANKA_1029500	2065.7	1.80633	0.213922	8.44389	3.06944e-17	1.22322e-16
PBANKA_1026000	47615.4	1.80453	0.132008	13.6699	1.53697e-42	1.41263e-41
PBANKA_1412000	2201.53	1.8019	0.193885	9.29366	1.49067e-20	6.75904e-20
PBANKA_0929700	8751.89	1.80098	0.123989	14.5252	8.38465e-48	8.98532e-47
PBANKA_1136000	593.182	1.8007	0.290268	6.20359	5.51883e-10	1.50382e-09
PBANKA_1106900	289.185	1.79947	0.391727	4.59367	4.35519e-06	9.08622e-06
PBANKA_0200600	18839.2	1.79331	0.126617	14.1633	1.54539e-45	1.55791e-44
PBANKA_0939500	37314.5	1.79139	0.12965	13.8171	2.01036e-43	1.89905e-42
PBANKA_0216041	105.987	1.78678	0.633279	2.82148	0.00478031	0.00735798
PBANKA_0836500	885.094	1.7825	0.248939	7.1604	8.04401e-13	2.58391e-12
PBANKA_0513900	11759.2	1.78081	0.130457	13.6506	2.003e-42	1.83106e-41
PBANKA_1106100	10134	1.7786	0.122827	14.4805	1.60966e-47	1.70704e-46
PBANKA_0716900	10081.9	1.7767	0.126078	14.0921	4.24841e-45	4.21617e-44
PBANKA_1460600	1115.08	1.77504	0.221199	8.02461	1.0185e-15	3.77845e-15
PBANKA_1431400	9625.29	1.77494	0.130893	13.5602	6.89676e-42	6.20465e-41
PBANKA_1204000	278.68	1.77448	0.401847	4.41581	1.00631e-05	2.02254e-05
PBANKA_1341700	1678.2	1.77027	0.202063	8.76098	1.93567e-18	8.03404e-18
PBANKA_0702000	18803.4	1.76919	0.13846	12.7776	2.18612e-37	1.73698e-36
PBANKA_0929300	33289	1.76777	0.111386	15.8707	1.01094e-56	1.3325e-55
PBANKA_1420800	24217.6	1.7672	0.138916	12.7214	4.49676e-37	3.55628e-36
PBANKA_0824000	739.538	1.76301	0.244961	7.19712	6.14984e-13	1.98924e-12
PBANKA_0621800	7261.95	1.76009	0.158066	11.1352	8.45979e-29	5.20547e-28
PBANKA_1330900	12065	1.75651	0.149948	11.7142	1.07857e-31	7.28712e-31
PBANKA_0825700	63165.3	1.75001	0.141711	12.3491	4.92552e-35	3.72223e-34
PBANKA_1463700	8072.92	1.74945	0.130096	13.4474	3.18821e-41	2.83329e-40
PBANKA_0721000	6221.46	1.74871	0.132634	13.1845	1.07819e-39	9.07568e-39
PBANKA_0403700	12072.9	1.74637	0.121749	14.344	1.16181e-46	1.19484e-45
PBANKA_1243100	21196.8	1.74219	0.121181	14.3768	7.23569e-47	7.5325e-46
PBANKA_0815700	13578	1.74134	0.133624	13.0316	8.08923e-39	6.68771e-38
PBANKA_0921200	1042.66	1.74076	0.221587	7.85585	3.97064e-15	1.43241e-14
PBANKA_1436400	13302	1.74044	0.125714	13.8444	1.3747e-43	1.31811e-42
PBANKA_0931500	17064.2	1.73885	0.116312	14.9499	1.55999e-50	1.7802e-49
PBANKA_1130900	38516.7	1.73589	0.135657	12.7962	1.72126e-37	1.36976e-36
PBANKA_0622900	1323.75	1.73565	0.22247	7.80173	6.10654e-15	2.17981e-14
PBANKA_0300700	7019.57	1.73073	0.136838	12.648	1.14773e-36	9.02093e-36
PBANKA_1130600	541.819	1.72895	0.295086	5.85914	4.6528e-09	1.19326e-08
PBANKA_1141900	1227.83	1.72612	0.218904	7.88526	3.13875e-15	1.13875e-14
PBANKA_1314900	19000.4	1.72486	0.124642	13.8385	1.49261e-43	1.42849e-42
PBANKA_1246600	221.406	1.72194	0.431175	3.99361	6.5074e-05	0.000121724
PBANKA_1328800	15133.7	1.71941	0.137648	12.4914	8.31983e-36	6.43998e-35
PBANKA_0910900	5417.99	1.71283	0.150598	11.3735	5.66637e-30	3.64032e-29
PBANKA_0908600	2411.76	1.71195	0.162893	10.5097	7.79597e-26	4.28526e-25
PBANKA_0826800	2697.86	1.71123	0.183493	9.32588	1.10068e-20	5.01751e-20
PBANKA_0719700	16493.3	1.71113	0.122847	13.929	4.22207e-44	4.09444e-43
PBANKA_1142000	3331.15	1.71068	0.223171	7.66531	1.78393e-14	6.21573e-14
PBANKA_0714600	8953.3	1.70971	0.135303	12.6362	1.33418e-36	1.04702e-35
PBANKA_0301100	14608.6	1.70786	0.120048	14.2264	6.28082e-46	6.38216e-45
PBANKA_1010400	1400.18	1.70782	0.197796	8.63422	5.91273e-18	2.42451e-17
PBANKA_0623450	43691.1	1.70754	0.122129	13.9815	2.02211e-44	1.97601e-43
PBANKA_0615900	78.4487	1.70548	0.767347	2.22257	0.0262446	0.0366778
PBANKA_1441000	1194.05	1.70547	0.20534	8.30558	9.93321e-17	3.85318e-16
PBANKA_0917200	8611.68	1.70256	0.13515	12.5975	2.17919e-36	1.6997e-35
PBANKA_0940300	9917.5	1.69818	0.124969	13.5889	4.66124e-42	4.22327e-41
PBANKA_0606300	17584.8	1.69746	0.156788	10.8264	2.57997e-27	1.50405e-26
PBANKA_0622000	52293.3	1.69737	0.111443	15.2308	2.20977e-52	2.62751e-51
PBANKA_0400500	1023.34	1.69667	0.227298	7.46452	8.36018e-14	2.82794e-13
PBANKA_1433700	8066.05	1.69614	0.125401	13.5258	1.10151e-41	9.87483e-41
PBANKA_0602800	85494	1.69122	0.139267	12.1437	6.19578e-34	4.50851e-33
PBANKA_0511000	151.974	1.6902	0.597872	2.82702	0.00469831	0.00724473
PBANKA_1205200	46348.4	1.68828	0.125594	13.4423	3.41539e-41	3.02989e-40
PBANKA_1455000	14261.5	1.68375	0.122843	13.7064	9.29152e-43	8.61746e-42
PBANKA_0907000	2174.37	1.67955	0.172637	9.72878	2.27311e-22	1.11706e-21
PBANKA_0611500	1595.11	1.67512	0.183422	9.13261	6.68652e-20	2.95051e-19
PBANKA_0720000	6440.03	1.67315	0.129466	12.9235	3.31766e-38	2.69052e-37
PBANKA_0927700	21105.5	1.67037	0.126599	13.1942	9.47311e-40	8.01365e-39
PBANKA_0402400	3872.31	1.66947	0.172665	9.66881	4.0911e-22	1.98939e-21
PBANKA_0820100	4505.41	1.66846	0.144687	11.5315	9.15204e-31	6.05506e-30
PBANKA_0910700	6289.74	1.66835	0.138888	12.0122	3.06397e-33	2.16173e-32
PBANKA_1136700	12377.9	1.66591	0.135735	12.2733	1.25975e-34	9.36731e-34
PBANKA_0934600	673.709	1.66027	0.268379	6.18628	6.15997e-10	1.67227e-09
PBANKA_1465700	93.4618	1.65268	0.683543	2.41781	0.015614	0.0225822
PBANKA_1229500	4138.59	1.65001	0.142462	11.5821	5.07878e-31	3.37768e-30
PBANKA_0409900	1691.84	1.64282	0.197657	8.31149	9.45043e-17	3.67149e-16
PBANKA_0816200	6988.64	1.64129	0.129744	12.6503	1.11489e-36	8.7763e-36
PBANKA_1442600	6075.4	1.63971	0.136409	12.0205	2.77217e-33	1.96128e-32
PBANKA_0611600	100814	1.63924	0.137171	11.9503	6.46964e-33	4.52077e-32
PBANKA_1336200	15140.7	1.63863	0.123475	13.271	3.41213e-40	2.93019e-39
PBANKA_1406500	2296.76	1.63196	0.198072	8.23924	1.73313e-16	6.63218e-16
PBANKA_0905500	2264.65	1.63092	0.164857	9.89295	4.46646e-23	2.26927e-22
PBANKA_1040300	73.8044	1.63029	0.697848	2.33617	0.0194824	0.0278296
PBANKA_0919400	7358.78	1.62988	0.136476	11.9426	7.09628e-33	4.9451e-32
PBANKA_0503500	38769.1	1.62883	0.114812	14.187	1.10288e-45	1.11623e-44
PBANKA_0213800	6686.61	1.62754	0.130939	12.4298	1.80121e-35	1.38165e-34
PBANKA_1461700	2266.61	1.62673	0.164664	9.87909	5.12992e-23	2.59858e-22
PBANKA_1037400	1110.24	1.62401	0.215457	7.53752	4.79008e-14	1.64098e-13
PBANKA_1033600	1221.21	1.62217	0.214455	7.56417	3.90347e-14	1.34356e-13
PBANKA_1405000	7492.83	1.62031	0.12945	12.5169	6.03642e-36	4.69387e-35
PBANKA_0523700	5755.49	1.61471	0.152341	10.5993	3.00149e-26	1.68063e-25
PBANKA_1207100	7889.82	1.6126	0.134367	12.0014	3.49127e-33	2.45302e-32
PBANKA_1017300	61443.5	1.61119	0.113955	14.1388	2.18849e-45	2.19322e-44
PBANKA_1312900	33705	1.60945	0.146274	11.003	3.6981e-28	2.22453e-27
PBANKA_0510400	8146.92	1.60779	0.129491	12.4162	2.13493e-35	1.63517e-34
PBANKA_0522100	3488.97	1.60728	0.159878	10.0532	8.8923e-24	4.60037e-23
PBANKA_1363200	1707.25	1.60501	0.227056	7.0688	1.56274e-12	4.9116e-12
PBANKA_0407200	16519.7	1.60373	0.120004	13.364	9.81532e-41	8.55862e-40
PBANKA_1236600	18399.9	1.59941	0.116049	13.7822	3.26099e-43	3.05217e-42
PBANKA_0112721	106.482	1.59747	0.600736	2.65918	0.00783304	0.0118005
PBANKA_1029600	8395.6	1.59708	0.146366	10.9115	1.01576e-27	6.03891e-27
PBANKA_0417100	2414.36	1.59583	0.166706	9.57275	1.04095e-21	4.97472e-21
PBANKA_1027700	4949.32	1.59546	0.14211	11.227	3.00621e-29	1.87237e-28
PBANKA_1414100	26676.2	1.5914	0.133551	11.9161	9.76079e-33	6.74659e-32
PBANKA_1034500	299.177	1.58687	0.374618	4.23596	2.27576e-05	4.44436e-05
PBANKA_0511400	17374.9	1.58623	0.119868	13.2331	5.64829e-40	4.81e-39
PBANKA_1107900	16695.6	1.58602	0.120242	13.1902	9.99668e-40	8.42861e-39
PBANKA_0815500	7701.11	1.58383	0.132372	11.965	5.41964e-33	3.79226e-32
PBANKA_1102900	2484.99	1.5819	0.176929	8.9409	3.86009e-19	1.66023e-18
PBANKA_0302600	7256.67	1.58001	0.147039	10.7456	6.219e-27	3.57645e-26
PBANKA_0213500	4750.92	1.57562	0.156601	10.0614	8.18504e-24	4.23877e-23
PBANKA_0515400	6058.16	1.57353	0.162382	9.69033	3.31457e-22	1.61795e-21
PBANKA_1340600	7993.89	1.57041	0.127912	12.2772	1.20031e-34	8.93834e-34
PBANKA_0930100	9500.35	1.56473	0.129625	12.0712	1.49933e-33	1.06967e-32
PBANKA_0600081	255.965	1.56448	0.400588	3.90547	9.40428e-05	0.000173494
PBANKA_1209400	63940.6	1.56417	0.116429	13.4346	3.79121e-41	3.35746e-40
PBANKA_0923600	8546.83	1.56294	0.14158	11.0393	2.46941e-28	1.49779e-27
PBANKA_1418900	73417.8	1.55976	0.127426	12.2405	1.88835e-34	1.40007e-33
PBANKA_0810400	1138.28	1.55893	0.229643	6.78849	1.13311e-11	3.41002e-11
PBANKA_1411200	20497	1.55767	0.142729	10.9135	9.9383e-28	5.91543e-27
PBANKA_1103700	6076.66	1.55347	0.143	10.8634	1.7223e-27	1.01566e-26
PBANKA_1015000	11226.1	1.54888	0.121364	12.7623	2.66331e-37	2.11284e-36
PBANKA_1240800	168.483	1.54437	0.501439	3.07987	0.00207093	0.0033536
PBANKA_1216300	21411.8	1.5428	0.123654	12.4767	1.00031e-35	7.71947e-35
PBANKA_1227600	2670.6	1.54271	0.176868	8.72238	2.72422e-18	1.12703e-17
PBANKA_1339500	1228.39	1.54252	0.209005	7.38033	1.57903e-13	5.2576e-13
PBANKA_1450400	7302.36	1.54146	0.128592	11.9872	4.14829e-33	2.91065e-32
PBANKA_1229400	438.984	1.53684	0.332883	4.61678	3.89747e-06	8.16804e-06
PBANKA_1026500	5870.63	1.53358	0.141456	10.8413	2.19221e-27	1.28386e-26
PBANKA_1456700	528.455	1.52892	0.285858	5.34852	8.86748e-08	2.08255e-07
PBANKA_0313600	1421.68	1.52784	0.203306	7.515	5.69123e-14	1.94187e-13
PBANKA_0515350	948.232	1.526	0.231953	6.57891	4.73896e-11	1.37427e-10
PBANKA_0817000	8305.6	1.52453	0.141704	10.7586	5.4e-27	3.11247e-26
PBANKA_1245150	9528.53	1.52334	0.147254	10.345	4.40698e-25	2.37381e-24
PBANKA_1304400	5523.3	1.52258	0.194201	7.84025	4.49651e-15	1.61299e-14
PBANKA_1233200	10935.5	1.52137	0.126442	12.0321	2.40879e-33	1.70893e-32
PBANKA_0515300	10982	1.52088	0.140621	10.8155	2.90699e-27	1.69083e-26
PBANKA_0917300	507.338	1.51948	0.368517	4.12324	3.73588e-05	7.14003e-05
PBANKA_0209300	75449.4	1.51909	0.12346	12.3042	8.59527e-35	6.42881e-34
PBANKA_1122100	1540.93	1.51819	0.185712	8.17498	2.95914e-16	1.11895e-15
PBANKA_0806800	56688.8	1.51771	0.125668	12.0771	1.396e-33	1.00014e-32
PBANKA_0504000	5645.35	1.51732	0.149146	10.1734	2.60631e-24	1.37201e-23
PBANKA_0831600	6658.07	1.51461	0.145381	10.4182	2.04884e-25	1.12016e-24
PBANKA_1427100	22101.1	1.51296	0.114085	13.2617	3.86184e-40	3.30524e-39
PBANKA_1038200	8260.61	1.50778	0.126384	11.9301	8.24512e-33	5.71445e-32
PBANKA_1237000	15666.8	1.5062	0.132706	11.3499	7.42443e-30	4.76378e-29
PBANKA_0718500	1597.2	1.50326	0.212372	7.07842	1.45804e-12	4.59103e-12
PBANKA_0409400	32243.9	1.50296	0.129189	11.6338	2.7759e-31	1.86559e-30
PBANKA_0607000	5383.9	1.50003	0.133799	11.2111	3.59708e-29	2.23492e-28
PBANKA_1034000	2050.85	1.49909	0.183444	8.17192	3.03527e-16	1.14688e-15
PBANKA_0108700	33747.9	1.49736	0.144647	10.3518	4.10598e-25	2.21636e-24
PBANKA_1131500	9814.72	1.49447	0.125576	11.9009	1.17047e-32	8.04659e-32
PBANKA_1207400	772.052	1.4937	0.247666	6.03111	1.62838e-09	4.3016e-09
PBANKA_0812800	20415.8	1.4922	0.132518	11.2604	2.05752e-29	1.29894e-28
PBANKA_0828100	8538.91	1.49171	0.126596	11.7832	4.76478e-32	3.24069e-31
PBANKA_0903300	407.481	1.491	0.352639	4.22813	2.35645e-05	4.59489e-05
PBANKA_1032300	4618.87	1.49062	0.156404	9.5306	1.56376e-21	7.38588e-21
PBANKA_0926900	10561.5	1.48694	0.130205	11.42	3.32275e-30	2.14549e-29
PBANKA_0604600	11909	1.48545	0.129214	11.4961	1.3806e-30	9.01722e-30
PBANKA_0315800	66744.3	1.48485	0.11923	12.4536	1.3361e-35	1.02642e-34
PBANKA_1300500	3347.65	1.48439	0.154721	9.59394	8.47811e-22	4.07605e-21
PBANKA_1448000	13841.4	1.48405	0.12846	11.5526	7.16262e-31	4.75117e-30
PBANKA_1114600	11951.2	1.48371	0.13943	10.6413	1.91443e-26	1.07906e-25
PBANKA_0207600	8153.28	1.48079	0.137649	10.7577	5.45362e-27	3.13983e-26
PBANKA_1038700	2992.11	1.47957	0.152299	9.71493	2.60438e-22	1.27863e-21
PBANKA_1029400	41465.6	1.47884	0.133781	11.0541	2.09336e-28	1.27273e-27
PBANKA_0832000	485.549	1.47876	0.454023	3.25701	0.0011259	0.00186529
PBANKA_0307200	9986.33	1.47823	0.128723	11.4839	1.58983e-30	1.03572e-29
PBANKA_1205500	1201.12	1.47518	0.210558	7.00604	2.45152e-12	7.6391e-12
PBANKA_0709500	13536.4	1.47491	0.122183	12.0713	1.49744e-33	1.06967e-32
PBANKA_1118300	3760.47	1.4732	0.180952	8.14138	3.9081e-16	1.47124e-15
PBANKA_0938900	5883.94	1.46894	0.150218	9.77872	1.38952e-22	6.90159e-22
PBANKA_0523600	12016.6	1.46831	0.121504	12.0844	1.27629e-33	9.16953e-33
PBANKA_1331300	17700.5	1.46792	0.129499	11.3354	8.76693e-30	5.59001e-29
PBANKA_1108100	1917.59	1.46658	0.174251	8.41652	3.87828e-17	1.53358e-16
PBANKA_1425200	1138.39	1.4665	0.243648	6.01893	1.75577e-09	4.62612e-09
PBANKA_0824500	432.741	1.4654	0.318218	4.60502	4.12434e-06	8.63286e-06
PBANKA_1124400	2858.85	1.46397	0.178524	8.20039	2.39603e-16	9.11421e-16
PBANKA_0417800	24548.4	1.46343	0.124243	11.7788	5.0203e-32	3.40993e-31
PBANKA_0830700	7468.5	1.46339	0.14982	9.7677	1.54927e-22	7.67265e-22
PBANKA_1336600	5017.7	1.46279	0.151641	9.6464	5.0913e-22	2.46401e-21
PBANKA_1435000	126.685	1.4622	0.566862	2.57947	0.00989523	0.0146476
PBANKA_1222500	7066.02	1.46215	0.143157	10.2136	1.72325e-24	9.10913e-24
PBANKA_1333100	11378.4	1.46168	0.134964	10.8301	2.47935e-27	1.44704e-26
PBANKA_1138400	6980	1.46161	0.1444	10.122	4.41484e-24	2.30267e-23
PBANKA_1463900	21382.6	1.45965	0.144428	10.1064	5.17658e-24	2.69446e-23
PBANKA_0110100	30209.9	1.457	0.126563	11.5121	1.1471e-30	7.55014e-30
PBANKA_0720100	5760.27	1.45536	0.13208	11.0188	3.10215e-28	1.87267e-27
PBANKA_0605600	38250.9	1.45451	0.127493	11.4085	3.79273e-30	2.44586e-29
PBANKA_0720700	789.309	1.45162	0.240515	6.03549	1.58484e-09	4.18874e-09
PBANKA_1009000	3547.37	1.45135	0.1536	9.44885	3.42558e-21	1.58853e-20
PBANKA_0905300	2449.98	1.45121	0.170323	8.5203	1.59147e-17	6.40731e-17
PBANKA_0716400	2553.82	1.45067	0.174364	8.3198	8.81139e-17	3.43368e-16
PBANKA_1202900	172.73	1.44634	0.50846	2.84455	0.00444741	0.00689133
PBANKA_0107800	311.872	1.44596	0.376672	3.83877	0.000123652	0.000225743
PBANKA_0608800	1086.11	1.44507	0.221827	6.51438	7.29889e-11	2.08581e-10
PBANKA_1110900	881.198	1.44414	0.228073	6.33193	2.42116e-10	6.69757e-10
PBANKA_0905400	1424.14	1.44202	0.23005	6.26829	3.65044e-10	1.00328e-09
PBANKA_1325500	6769.21	1.43924	0.128808	11.1736	5.49384e-29	3.38864e-28
PBANKA_0707000	1024.24	1.43868	0.245236	5.8665	4.45094e-09	1.14264e-08
PBANKA_1408700	851.017	1.43718	0.237974	6.03921	1.54873e-09	4.10181e-09
PBANKA_0911100	3256.01	1.43619	0.164259	8.74345	2.26092e-18	9.36876e-18
PBANKA_0702200	2069.94	1.43194	0.169026	8.47172	2.41791e-17	9.65838e-17
PBANKA_0317141	11885.5	1.43149	0.138586	10.3293	5.19643e-25	2.78728e-24
PBANKA_0717600	4405.12	1.43127	0.151159	9.4686	2.83609e-21	1.31997e-20
PBANKA_1313300	1877.31	1.42617	0.179197	7.95864	1.73942e-15	6.3971e-15
PBANKA_1005800	5576.22	1.42588	0.136999	10.4079	2.28105e-25	1.24578e-24
PBANKA_0502700	20145.1	1.42566	0.116447	12.243	1.83166e-34	1.36001e-33
PBANKA_1229800	4684.11	1.42476	0.137882	10.3332	4.98466e-25	2.67932e-24
PBANKA_0407400	9179.86	1.41824	0.132615	10.6944	1.08077e-26	6.18744e-26
PBANKA_0603000	4888.4	1.41553	0.137	10.3323	5.03436e-25	2.70319e-24
PBANKA_1012400	4318.02	1.4153	0.141198	10.0235	1.20123e-23	6.19562e-23
PBANKA_1012600	601.625	1.41202	0.293355	4.81335	1.48424e-06	3.21082e-06
PBANKA_1020500	2039.89	1.40978	0.173211	8.13909	3.98244e-16	1.49811e-15
PBANKA_1314300	9229.34	1.40734	0.124129	11.3377	8.53518e-30	5.44905e-29
PBANKA_0921100	2367.6	1.40714	0.215845	6.51923	7.06699e-11	2.02293e-10
PBANKA_1232300	8037.08	1.40607	0.124972	11.2511	2.28668e-29	1.43649e-28
PBANKA_1002600	1586.66	1.40568	0.195165	7.20253	5.91076e-13	1.91312e-12
PBANKA_0911000	2887.28	1.40484	0.174266	8.06147	7.53845e-16	2.8109e-15
PBANKA_0802500	2169.44	1.40155	0.169227	8.28206	1.21067e-16	4.68206e-16
PBANKA_0721100	18220.7	1.39696	0.128854	10.8415	2.1894e-27	1.28369e-26
PBANKA_0828800	36662.5	1.39273	0.160147	8.69655	3.42137e-18	1.41201e-17
PBANKA_0935700	2371.37	1.39153	0.165249	8.42083	3.73841e-17	1.48056e-16
PBANKA_0902600	474.703	1.39143	0.306245	4.54351	5.53252e-06	1.14303e-05
PBANKA_0608500	1411.55	1.39028	0.208817	6.6579	2.77772e-11	8.15725e-11
PBANKA_0620600	4770.63	1.38825	0.137221	10.1168	4.65161e-24	2.42369e-23
PBANKA_1403300	14470.4	1.38776	0.126428	10.9767	4.94755e-28	2.96562e-27
PBANKA_0213700	12315.2	1.38587	0.130103	10.6521	1.70515e-26	9.6644e-26
PBANKA_1414100.2	23710.9	1.38581	0.141592	9.78735	1.27596e-22	6.35614e-22
PBANKA_1310500	44812.3	1.38517	0.112102	12.3564	4.49997e-35	3.41075e-34
PBANKA_1356800	6250.41	1.38376	0.131604	10.5146	7.40159e-26	4.08609e-25
PBANKA_0512200	3210.66	1.38301	0.165399	8.36164	6.18535e-17	2.4263e-16
PBANKA_0209000	763.553	1.38285	0.261227	5.29366	1.19892e-07	2.79129e-07
PBANKA_1011600	7440.96	1.38261	0.19475	7.09944	1.25264e-12	3.96876e-12
PBANKA_0903100	14035.9	1.38109	0.122667	11.2588	2.09511e-29	1.3194e-28
PBANKA_1318700	5152.57	1.37858	0.139089	9.91154	3.70875e-23	1.88994e-22
PBANKA_0918500	1141.71	1.37844	0.241225	5.71433	1.10135e-08	2.74718e-08
PBANKA_0212800.2	5222.73	1.37546	0.157985	8.70629	3.1398e-18	1.2979e-17
PBANKA_0602500	1209.84	1.37532	0.211874	6.49119	8.51583e-11	2.42542e-10
PBANKA_0719900	2959.58	1.3749	0.155663	8.83253	1.02331e-18	4.29269e-18
PBANKA_0815800	3055.82	1.37486	0.195536	7.03124	2.04709e-12	6.41807e-12
PBANKA_1212400	1522.2	1.37448	0.192347	7.14584	8.94488e-13	2.85889e-12
PBANKA_1208200	23934.5	1.37381	0.119385	11.5074	1.21012e-30	7.95466e-30
PBANKA_1141400	12042.7	1.37323	0.135592	10.1277	4.16223e-24	2.17313e-23
PBANKA_1146721	1202.45	1.3731	0.209788	6.54515	5.9437e-11	1.71487e-10
PBANKA_1016000	7055.67	1.37275	0.145252	9.45082	3.36183e-21	1.56039e-20
PBANKA_1337700	3650.71	1.36925	0.201372	6.7996	1.04912e-11	3.16286e-11
PBANKA_0831100	14365.3	1.36546	0.125721	10.861	1.76707e-27	1.04085e-26
PBANKA_0931600	6305.01	1.3643	0.139964	9.74747	1.8912e-22	9.3298e-22
PBANKA_0205000	7899.99	1.36394	0.182247	7.48404	7.20721e-14	2.44441e-13
PBANKA_1110000	469.419	1.36193	0.314488	4.33062	1.48689e-05	2.9432e-05
PBANKA_0505000	980.252	1.36063	0.265494	5.12491	2.97677e-07	6.7788e-07
PBANKA_1107800	13054.5	1.35982	0.128942	10.546	5.30102e-26	2.94238e-25
PBANKA_0939100	18813	1.3597	0.124945	10.8824	1.39787e-27	8.29132e-27
PBANKA_1100400	122.532	1.35876	0.639706	2.12403	0.0336673	0.0462903
PBANKA_0711400	532.982	1.35822	0.280306	4.84549	1.263e-06	2.74619e-06
PBANKA_1206800	276.377	1.35678	0.405294	3.34765	0.000815001	0.00136619
PBANKA_1026300	36009.1	1.35644	0.117715	11.523	1.01006e-30	6.66538e-30
PBANKA_1411500	487.926	1.35288	0.305711	4.42534	9.62901e-06	1.93758e-05
PBANKA_1421400	7479.76	1.35284	0.135981	9.94873	2.5541e-23	1.30546e-22
PBANKA_0911700	16019.1	1.3495	0.126734	10.6482	1.77691e-26	1.00488e-25
PBANKA_1102300	12127.2	1.34881	0.124972	10.7929	3.7175e-27	2.15488e-26
PBANKA_1453300	67113.2	1.34579	0.111058	12.1179	8.49254e-34	6.16222e-33
PBANKA_0307800	24311	1.33914	0.113436	11.8053	3.66444e-32	2.49897e-31
PBANKA_0711700	1712.47	1.33732	0.192063	6.96293	3.33266e-12	1.0328e-11
PBANKA_0600300	493.314	1.33638	0.324854	4.11379	3.89224e-05	7.4305e-05
PBANKA_1402500	34107.1	1.33534	0.123427	10.8189	2.8005e-27	1.63075e-26
PBANKA_0102700	7031.08	1.33524	0.135816	9.83122	8.26103e-23	4.14351e-22
PBANKA_1319700	5347.32	1.33429	0.137471	9.70595	2.84415e-22	1.39366e-21
PBANKA_0602900	7852.04	1.33228	0.129468	10.2904	7.78607e-25	4.15882e-24
PBANKA_1400900	36296.4	1.33088	0.119962	11.0941	1.33931e-28	8.21134e-28
PBANKA_1346400	9009.74	1.33018	0.124457	10.6879	1.15974e-26	6.61726e-26
PBANKA_0403300	372.844	1.32952	0.423067	3.14257	0.00167473	0.00273282
PBANKA_1420700	10620.1	1.32884	0.120994	10.9827	4.62848e-28	2.77763e-27
PBANKA_0214800	29416.5	1.32793	0.117729	11.2796	1.6552e-29	1.05145e-28
PBANKA_1225600	10266	1.32604	0.158339	8.37471	5.53612e-17	2.17564e-16
PBANKA_1360200	6909.96	1.32456	0.128517	10.3065	6.58857e-25	3.52658e-24
PBANKA_1135900	953.896	1.32393	0.220247	6.01109	1.84277e-09	4.84533e-09
PBANKA_1201700	2174.37	1.32129	0.166707	7.92583	2.26632e-15	8.28117e-15
PBANKA_0908500	9272.32	1.31797	0.124062	10.6234	2.31871e-26	1.30261e-25
PBANKA_1414600	2457.77	1.31509	0.179307	7.33428	2.22916e-13	7.35509e-13
PBANKA_1321500	3643.23	1.31448	0.158744	8.2805	1.22659e-16	4.74001e-16
PBANKA_1236800	7822.85	1.31363	0.127598	10.2951	7.41667e-25	3.96567e-24
PBANKA_0918400	1245.07	1.31249	0.205179	6.3968	1.58668e-10	4.45685e-10
PBANKA_1340200	4414.98	1.30942	0.15361	8.52431	1.53724e-17	6.19387e-17
PBANKA_0302900	4988.34	1.30906	0.139614	9.37631	6.83209e-21	3.13454e-20
PBANKA_0941000	642.933	1.30745	0.275352	4.74827	2.05169e-06	4.40289e-06
PBANKA_1106800	6321.7	1.30557	0.134113	9.73485	2.14124e-22	1.05531e-21
PBANKA_1359500	6630.14	1.30526	0.151782	8.59961	7.99888e-18	3.25897e-17
PBANKA_0214000	11608.8	1.30473	0.146928	8.88003	6.68425e-19	2.83192e-18
PBANKA_1463100	5220.11	1.30466	0.14181	9.20006	3.5776e-20	1.59383e-19
PBANKA_1228700	1745.93	1.3039	0.185973	7.01124	2.36208e-12	7.36941e-12
PBANKA_1326600	7384.07	1.30137	0.136421	9.53942	1.43635e-21	6.8093e-21
PBANKA_1439000	2839.01	1.29728	0.153965	8.42583	3.58205e-17	1.42084e-16
PBANKA_1139800	13152	1.29625	0.121991	10.6258	2.26152e-26	1.27329e-25
PBANKA_1113200	2780.09	1.29151	0.244843	5.27488	1.32845e-07	3.08586e-07
PBANKA_0942000	2853.15	1.2907	0.205664	6.27576	3.47932e-10	9.57798e-10
PBANKA_0835500	15712.8	1.2903	0.122541	10.5296	6.31253e-26	3.49622e-25
PBANKA_1205300	30678.4	1.28917	0.111231	11.5901	4.62688e-31	3.08923e-30
PBANKA_0510500	835.754	1.28906	0.251891	5.11752	3.09575e-07	7.02779e-07
PBANKA_0600700	2610.53	1.28788	0.170168	7.56831	3.78119e-14	1.30316e-13
PBANKA_0711300	14352.4	1.28626	0.144549	8.89843	5.66416e-19	2.41579e-18
PBANKA_1006400	327.934	1.2858	0.363351	3.53873	0.000402061	0.000693814
PBANKA_1445900	13304.1	1.2855	0.125249	10.2635	1.02882e-24	5.47809e-24
PBANKA_0929200	23242.4	1.28518	0.116176	11.0624	1.90987e-28	1.16395e-27
PBANKA_0825400	3012.46	1.28245	0.190488	6.73248	1.66799e-11	4.96986e-11
PBANKA_1300700	47444.6	1.27959	0.137143	9.33033	1.05545e-20	4.81993e-20
PBANKA_0722600	8074.63	1.27905	0.126279	10.1288	4.11815e-24	2.15232e-23
PBANKA_0209600	1292.1	1.27754	0.296729	4.30542	1.66672e-05	3.2915e-05
PBANKA_1446200	1779.46	1.27648	0.199001	6.41445	1.41331e-10	3.97645e-10
PBANKA_1207800	5075.51	1.27558	0.148601	8.58394	9.16784e-18	3.71742e-17
PBANKA_0100400	363.902	1.27225	0.37353	3.40602	0.000659181	0.00111562
PBANKA_1428000	3606.03	1.27177	0.170358	7.46528	8.3124e-14	2.81364e-13
PBANKA_0413400	4566.82	1.26834	0.154916	8.18731	2.67139e-16	1.01314e-15
PBANKA_0902100	1502.12	1.2681	0.190272	6.66467	2.65258e-11	7.79873e-11
PBANKA_1355300	401.29	1.26711	0.316263	4.00651	6.16237e-05	0.000115482
PBANKA_0829700	2974.59	1.26148	0.152938	8.24832	1.6063e-16	6.16534e-16
PBANKA_1319100	4595.73	1.26142	0.143369	8.79838	1.38801e-18	5.78924e-18
PBANKA_0821600	1562.29	1.26084	0.268946	4.68809	2.75766e-06	5.86117e-06
PBANKA_1361300	16287.7	1.26018	0.135584	9.29442	1.48012e-20	6.71714e-20
PBANKA_1452800	12146.3	1.25965	0.141906	8.87665	6.89037e-19	2.91441e-18
PBANKA_0801100	2707.08	1.25754	0.194035	6.48099	9.11199e-11	2.59087e-10
PBANKA_0111700	11752.8	1.25707	0.133373	9.4252	4.29304e-21	1.98539e-20
PBANKA_1014800	13177.5	1.25674	0.119152	10.5474	5.22322e-26	2.90552e-25
PBANKA_0603700	6520.24	1.25587	0.130788	9.60235	7.81448e-22	3.76764e-21
PBANKA_1349300	6552.02	1.25543	0.131149	9.57253	1.04326e-21	4.97817e-21
PBANKA_1429100	10643.4	1.2553	0.131607	9.53825	1.4526e-21	6.87995e-21
PBANKA_0714100	9671.18	1.25491	0.14065	8.9222	4.57109e-19	1.95614e-18
PBANKA_0611300	1390.21	1.25371	0.249095	5.03308	4.82665e-07	1.08318e-06
PBANKA_0914600	23181.6	1.2527	0.14094	8.88818	6.21164e-19	2.64047e-18
PBANKA_0928300	3248.7	1.25131	0.149802	8.35311	6.64892e-17	2.60293e-16
PBANKA_0504100	692.008	1.25056	0.252134	4.9599	7.05312e-07	1.55951e-06
PBANKA_0111600	1292.25	1.24869	0.199816	6.24923	4.1249e-10	1.13003e-09
PBANKA_0909500	17096.3	1.24712	0.120738	10.3291	5.20443e-25	2.78864e-24
PBANKA_0107700	7414.35	1.24685	0.144417	8.63367	5.94152e-18	2.43435e-17
PBANKA_0904300	2682.77	1.24508	0.174494	7.13536	9.65369e-13	3.0758e-12
PBANKA_1026800	13740.2	1.24302	0.125044	9.94071	2.7685e-23	1.41362e-22
PBANKA_0216761	330.086	1.23946	0.351915	3.52204	0.000428246	0.000737006
PBANKA_1451800	3220.82	1.23937	0.155278	7.98163	1.44415e-15	5.33811e-15
PBANKA_0721200	740.936	1.23864	0.246448	5.02598	5.00864e-07	1.12057e-06
PBANKA_1343400	6905.44	1.2377	0.134746	9.18541	4.09946e-20	1.82154e-19
PBANKA_1452700	606.77	1.23703	0.270679	4.57012	4.87449e-06	1.01241e-05
PBANKA_1115200	51296.6	1.23639	0.117584	10.515	7.37157e-26	4.07393e-25
PBANKA_1102000	2025.1	1.23404	0.203965	6.05023	1.4464e-09	3.84076e-09
PBANKA_1024400	6855.72	1.23243	0.143472	8.59004	8.69418e-18	3.53379e-17
PBANKA_1030400	9138.68	1.23162	0.13717	8.97879	2.73752e-19	1.18541e-18
PBANKA_0834100	2395.1	1.23156	0.171846	7.16665	7.68544e-13	2.47184e-12
PBANKA_1035200	15896.5	1.22977	0.134368	9.15225	5.57611e-20	2.4648e-19
PBANKA_1027600	1098.29	1.22929	0.214743	5.72446	1.03761e-08	2.58947e-08
PBANKA_1330200	1018.29	1.22491	0.240935	5.08398	3.69614e-07	8.34618e-07
PBANKA_0832500	3810.7	1.22403	0.161562	7.57625	3.55678e-14	1.22838e-13
PBANKA_0824100	911.596	1.22361	0.225586	5.42415	5.82306e-08	1.3822e-07
PBANKA_1461000	761.157	1.22292	0.253189	4.83008	1.36477e-06	2.95991e-06
PBANKA_0901300	24229.3	1.22219	0.150885	8.10011	5.49091e-16	2.05496e-15
PBANKA_0521700	2723.11	1.2213	0.191744	6.36945	1.89703e-10	5.29652e-10
PBANKA_0817300	2688.64	1.22109	0.173977	7.01865	2.24021e-12	7.00203e-12
PBANKA_1243000	7578.51	1.21827	0.132698	9.1808	4.27898e-20	1.89801e-19
PBANKA_0620700	2713.75	1.2176	0.192229	6.33409	2.38746e-10	6.61152e-10
PBANKA_1012000	1330.8	1.21741	0.210023	5.79656	6.76877e-09	1.71182e-08
PBANKA_1108700	34776.7	1.21523	0.127988	9.4949	2.20413e-21	1.03339e-20
PBANKA_0619500	3406.82	1.21259	0.175792	6.89789	5.27814e-12	1.62094e-11
PBANKA_1423000	2795.74	1.21109	0.172916	7.00392	2.48896e-12	7.75104e-12
PBANKA_1311600	3829.21	1.20953	0.15014	8.05601	7.88278e-16	2.93504e-15
PBANKA_1123700	1434.17	1.20868	0.209581	5.76713	8.06351e-09	2.02521e-08
PBANKA_1345500	14385.8	1.20714	0.118369	10.1981	2.02187e-24	1.06655e-23
PBANKA_1219900	3824.97	1.20663	0.14844	8.12874	4.33793e-16	1.62944e-15
PBANKA_0207900	464.69	1.20561	0.320423	3.76256	0.000168183	0.000302503
PBANKA_0810300	1561.83	1.20403	0.187065	6.43643	1.22314e-10	3.45282e-10
PBANKA_1123800	18567.3	1.19751	0.117111	10.2254	1.52577e-24	8.08197e-24
PBANKA_0917000	9110.72	1.19591	0.125601	9.52146	1.70757e-21	8.02794e-21
PBANKA_1131400	19669.7	1.19549	0.116637	10.2497	1.18679e-24	6.31264e-24
PBANKA_1114000	2344.43	1.19497	0.197608	6.04719	1.47395e-09	3.90985e-09
PBANKA_1320100	12124.3	1.19472	0.126133	9.47189	2.74815e-21	1.28138e-20
PBANKA_0903000	4940.2	1.19296	0.153414	7.77606	7.48153e-15	2.66132e-14
PBANKA_0212800	3648.84	1.19177	0.155638	7.6573	1.89884e-14	6.61158e-14
PBANKA_1324300	510.82	1.19108	0.309213	3.85196	0.000117175	0.000214463
PBANKA_1340900	788.848	1.19001	0.238466	4.99026	6.02996e-07	1.34084e-06
PBANKA_1300900	2326.82	1.18556	0.177751	6.66979	2.56173e-11	7.54905e-11
PBANKA_0909000	892.069	1.18551	0.226546	5.23298	1.66802e-07	3.86577e-07
PBANKA_0828900	13640.6	1.18518	0.161405	7.34289	2.09025e-13	6.90567e-13
PBANKA_0807800	1679.59	1.18319	0.180709	6.54746	5.85248e-11	1.6895e-10
PBANKA_0700081	235.682	1.18229	0.450869	2.62224	0.00873541	0.0130596
PBANKA_0104100	9621.56	1.18188	0.121963	9.69051	3.30866e-22	1.61662e-21
PBANKA_1004100	3856.56	1.1813	0.155507	7.59643	3.04405e-14	1.05487e-13
PBANKA_1029400.2	16856.8	1.17819	0.126296	9.32879	1.07083e-20	4.8858e-20
PBANKA_1140900	19864.8	1.17735	0.140018	8.40856	4.15071e-17	1.63876e-16
PBANKA_1441900	6816.9	1.17709	0.142016	8.28838	1.14805e-16	4.44324e-16
PBANKA_1213200	9426.29	1.177	0.132337	8.89398	5.89581e-19	2.51039e-18
PBANKA_1337000	2685.19	1.17568	0.156592	7.50792	6.00758e-14	2.0457e-13
PBANKA_0819600	3651.78	1.17557	0.156248	7.52371	5.3245e-14	1.82039e-13
PBANKA_1028800	13216.8	1.17454	0.12317	9.53591	1.48576e-21	7.03048e-21
PBANKA_1307000	18484.5	1.1745	0.14252	8.24096	1.70841e-16	6.54739e-16
PBANKA_1364900	2859.84	1.17348	0.159045	7.37828	1.60349e-13	5.33556e-13
PBANKA_0912600	6878.21	1.17343	0.132154	8.87928	6.72922e-19	2.84861e-18
PBANKA_0501700	11979.8	1.17212	0.122813	9.54393	1.37514e-21	6.52521e-21
PBANKA_1022600	3230.52	1.16818	0.159942	7.30378	2.79798e-13	9.19028e-13
PBANKA_0703700	8192.59	1.16552	0.126615	9.20521	3.41018e-20	1.52396e-19
PBANKA_1447200	1471.33	1.16533	0.234259	4.97453	6.54074e-07	1.44873e-06
PBANKA_1125300	11435.6	1.16512	0.153737	7.57867	3.49112e-14	1.20652e-13
PBANKA_1413000	12187.8	1.1648	0.120475	9.66841	4.10721e-22	1.99532e-21
PBANKA_0304100	766.424	1.1647	0.273802	4.25381	2.10166e-05	4.11853e-05
PBANKA_1338700	12875.9	1.16183	0.118065	9.84063	7.52413e-23	3.78881e-22
PBANKA_1360800	1229.73	1.1591	0.206743	5.60646	2.06504e-08	5.05458e-08
PBANKA_1011200	1228.26	1.15846	0.265346	4.36583	1.26643e-05	2.52741e-05
PBANKA_1409200	7924.61	1.15793	0.138687	8.34924	6.87057e-17	2.68764e-16
PBANKA_1010900	1588.62	1.15791	0.198141	5.84385	5.10085e-09	1.30293e-08
PBANKA_1218700	1221.81	1.15614	0.232244	4.97811	6.42075e-07	1.42463e-06
PBANKA_0619400	13218.4	1.15569	0.123226	9.37861	6.68503e-21	3.07487e-20
PBANKA_1222700	767.787	1.1545	0.30278	3.813	0.000137293	0.000249051
PBANKA_0712100	19314.3	1.1524	0.119227	9.66557	4.22267e-22	2.04946e-21
PBANKA_0803900	257.771	1.15134	0.402922	2.85747	0.00427037	0.00664121
PBANKA_0721500	7897.46	1.15027	0.130097	8.84164	9.43227e-19	3.9698e-18
PBANKA_0613700	24788.2	1.14924	0.126773	9.06536	1.24193e-19	5.4332e-19
PBANKA_1003400	18004.1	1.14712	0.129391	8.86553	7.61397e-19	3.21514e-18
PBANKA_0807700	1660.81	1.14645	0.180641	6.34656	2.20186e-10	6.11081e-10
PBANKA_1306500	155.871	1.14506	0.538416	2.12673	0.0334427	0.0459938
PBANKA_0408100	5669.84	1.14492	0.137171	8.34664	7.02318e-17	2.74523e-16
PBANKA_1432700	5649.58	1.14429	0.134444	8.51129	1.72015e-17	6.91448e-17
PBANKA_1135800	3995.59	1.1441	0.16547	6.91421	4.70469e-12	1.44657e-11
PBANKA_0901000	12468.1	1.14344	0.137752	8.30069	1.03509e-16	4.01217e-16
PBANKA_1024300	3023.53	1.14283	0.171961	6.64584	3.01496e-11	8.8336e-11
PBANKA_0828200	6775.36	1.14254	0.144334	7.91592	2.45423e-15	8.94857e-15
PBANKA_0910000	5112.83	1.1418	0.139483	8.18597	2.70127e-16	1.02371e-15
PBANKA_0501600	1177.63	1.14149	0.238389	4.78836	1.68152e-06	3.62835e-06
PBANKA_1013900	8415.21	1.13942	0.135339	8.41901	3.79673e-17	1.50249e-16
PBANKA_1203700	9370.37	1.13936	0.13122	8.68282	3.86083e-18	1.58823e-17
PBANKA_0505900	3950.17	1.13911	0.168009	6.78007	1.20115e-11	3.61052e-11
PBANKA_0913900	3646.15	1.13857	0.14593	7.8022	6.08361e-15	2.17314e-14
PBANKA_0415700	48423.2	1.13704	0.131556	8.643	5.47543e-18	2.25062e-17
PBANKA_0522400	10088.8	1.13655	0.122764	9.25801	2.08283e-20	9.36906e-20
PBANKA_1344700	1090.67	1.13651	0.222031	5.11871	3.07627e-07	6.98978e-07
PBANKA_0902500	9137.4	1.13627	0.167157	6.79762	1.06364e-11	3.20473e-11
PBANKA_1026700	3813.72	1.13571	0.171987	6.60344	4.01712e-11	1.16826e-10
PBANKA_0400900	1533.45	1.13536	0.249353	4.55322	5.28307e-06	1.0946e-05
PBANKA_1443900	5563.24	1.13092	0.150894	7.49479	6.64052e-14	2.25521e-13
PBANKA_0204500	9906.42	1.13031	0.136894	8.25684	1.49576e-16	5.75839e-16
PBANKA_1008900	7709.54	1.12965	0.137744	8.20107	2.38247e-16	9.07617e-16
PBANKA_0930800	764.994	1.12889	0.241589	4.67277	2.97165e-06	6.2924e-06
PBANKA_1202800	2015.38	1.12812	0.17401	6.4831	8.98574e-11	2.5564e-10
PBANKA_1118100.2	3715.02	1.12732	0.181083	6.22545	4.80174e-10	1.30982e-09
PBANKA_1244900	2885.35	1.12622	0.171303	6.57439	4.88533e-11	1.41511e-10
PBANKA_1348700	5324.49	1.1238	0.151012	7.44185	9.92851e-14	3.34293e-13
PBANKA_1460000	771.047	1.12301	0.24691	4.54824	5.40956e-06	1.11898e-05
PBANKA_0510600	2230.81	1.12244	0.174142	6.44556	1.15174e-10	3.26027e-10
PBANKA_0304700	134.934	1.12111	0.521816	2.14848	0.0316759	0.0437291
PBANKA_0907500	17914.1	1.11896	0.119339	9.37629	6.83318e-21	3.13454e-20
PBANKA_1232400	2072.21	1.1172	0.201659	5.54004	3.02396e-08	7.31401e-08
PBANKA_0616900	856.381	1.11702	0.244774	4.56347	5.03161e-06	1.04377e-05
PBANKA_1334200	1362.22	1.11539	0.194621	5.73106	9.98034e-09	2.49435e-08
PBANKA_1308100	6953.32	1.11243	0.137306	8.10182	5.41431e-16	2.02778e-15
PBANKA_0212700	18829.7	1.11211	0.119775	9.285	1.61705e-20	7.31907e-20
PBANKA_0717200	7012.08	1.1092	0.133473	8.31027	9.54854e-17	3.70678e-16
PBANKA_0405600	3314.01	1.10755	0.151142	7.32791	2.33762e-13	7.70795e-13
PBANKA_0501800	2795.33	1.10748	0.161202	6.87013	6.41447e-12	1.96164e-11
PBANKA_1305700	14843.1	1.10719	0.126065	8.78272	1.59562e-18	6.63886e-18
PBANKA_1112700	4579.61	1.10651	0.182673	6.05732	1.38408e-09	3.68293e-09
PBANKA_0934800	1317.68	1.10577	0.23453	4.71482	2.41929e-06	5.16783e-06
PBANKA_1343200	23639.5	1.10574	0.116839	9.46381	2.96929e-21	1.37945e-20
PBANKA_0718900	2691.55	1.10561	0.162114	6.81997	9.10605e-12	2.75995e-11
PBANKA_1332700	3429.6	1.1056	0.16057	6.88549	5.75886e-12	1.76538e-11
PBANKA_1003600	2167.79	1.10454	0.199332	5.54119	3.00423e-08	7.26973e-08
PBANKA_0940500	183.453	1.10324	0.482317	2.28737	0.022174	0.0314631
PBANKA_0406200	3043.71	1.10094	0.171031	6.4371	1.2178e-10	3.44155e-10
PBANKA_1133800	2268.99	1.10084	0.169643	6.48917	8.63101e-11	2.45685e-10
PBANKA_1409600	30476.2	1.10053	0.138624	7.93898	2.03849e-15	7.47006e-15
PBANKA_1113700	10859.5	1.0984	0.12408	8.85238	8.56695e-19	3.61456e-18
PBANKA_0819700	3470.87	1.09817	0.171223	6.41368	1.42051e-10	3.99449e-10
PBANKA_1129600	40736.1	1.09388	0.13156	8.31464	9.20315e-17	3.57815e-16
PBANKA_1223200	3250.9	1.09231	0.151447	7.2125	5.49334e-13	1.77915e-12
PBANKA_0504800	6932.9	1.09226	0.139416	7.83452	4.70619e-15	1.68347e-14
PBANKA_1215400	5012.74	1.08996	0.137122	7.94887	1.88216e-15	6.9121e-15
PBANKA_0601500	1753.81	1.08856	0.183497	5.93231	2.98705e-09	7.73055e-09
PBANKA_1131300	149.381	1.08771	0.509578	2.13452	0.0328	0.0451586
PBANKA_1026900	3427.35	1.08741	0.150307	7.23455	4.67062e-13	1.51944e-12
PBANKA_1220900	2639.08	1.087	0.170596	6.37174	1.8689e-10	5.22371e-10
PBANKA_1245100	3233.37	1.0855	0.151824	7.14972	8.69536e-13	2.78437e-12
PBANKA_0300300	717.67	1.08462	0.249674	4.34415	1.39818e-05	2.78055e-05
PBANKA_0828500	6701.4	1.08164	0.136187	7.94233	1.98419e-15	7.28154e-15
PBANKA_0710200	6318.49	1.08142	0.137637	7.85699	3.93464e-15	1.42042e-14
PBANKA_0706500	508.04	1.08133	0.288682	3.74576	0.000179848	0.000322689
PBANKA_1405600	2230.15	1.08098	0.164783	6.56004	5.37917e-11	1.55551e-10
PBANKA_1227700	935.57	1.08014	0.242301	4.45786	8.27829e-06	1.67636e-05
PBANKA_1224900	11750.5	1.08008	0.122753	8.79878	1.38314e-18	5.77364e-18
PBANKA_0826600	1840.39	1.07954	0.181698	5.94139	2.82621e-09	7.32917e-09
PBANKA_0825800	9489.11	1.07943	0.134778	8.00893	1.15713e-15	4.28651e-15
PBANKA_0941700	10095.4	1.07305	0.122443	8.76366	1.89009e-18	7.85126e-18
PBANKA_1034700	27522	1.07195	0.125654	8.53097	1.4512e-17	5.85183e-17
PBANKA_0902800	199.428	1.07035	0.452782	2.36393	0.0180823	0.025924
PBANKA_0834800	2001.07	1.07026	0.199706	5.35917	8.3605e-08	1.96802e-07
PBANKA_1203450	1657.38	1.07024	0.267995	3.99352	6.50987e-05	0.000121726
PBANKA_0305500	800.331	1.07001	0.251653	4.25194	2.11922e-05	4.14977e-05
PBANKA_1351100	1538.63	1.06968	0.189011	5.65935	1.51951e-08	3.7499e-08
PBANKA_0712400	3365.41	1.06932	0.156175	6.84692	7.54554e-12	2.29653e-11
PBANKA_1225100	4345.98	1.06897	0.142305	7.51179	5.83255e-14	1.98743e-13
PBANKA_0405700	4609.16	1.0676	0.138954	7.68313	1.55248e-14	5.42412e-14
PBANKA_1457200	15427.4	1.06714	0.130618	8.16992	3.0859e-16	1.16429e-15
PBANKA_1354200	4641.58	1.06674	0.144768	7.36863	1.7239e-13	5.72501e-13
PBANKA_0303000	1426.18	1.06632	0.191226	5.57622	2.45802e-08	5.98205e-08
PBANKA_1336500	3458.73	1.06574	0.157356	6.77279	1.26318e-11	3.79029e-11
PBANKA_1018800	10721.7	1.06548	0.133218	7.99798	1.26474e-15	4.67834e-15
PBANKA_1027200	1703.02	1.06328	0.190029	5.59536	2.20165e-08	5.37865e-08
PBANKA_0706300	952.93	1.06282	0.231577	4.58948	4.44358e-06	9.25927e-06
PBANKA_1244100	760.527	1.0619	0.246828	4.3022	1.69114e-05	3.33844e-05
PBANKA_0413800	488.691	1.06184	0.296937	3.57598	0.000348916	0.000607239
PBANKA_0828000	11585.5	1.06105	0.137497	7.71685	1.19235e-14	4.18884e-14
PBANKA_0921000	527.607	1.06093	0.341561	3.10612	0.00189557	0.0030794
PBANKA_1005600	2867.84	1.05974	0.158339	6.69286	2.18848e-11	6.48282e-11
PBANKA_0830300	12135.8	1.05963	0.140273	7.55409	4.2181e-14	1.44795e-13
PBANKA_1231600	12946.4	1.05954	0.134358	7.88593	3.12213e-15	1.13352e-14
PBANKA_0938100	829.221	1.05939	0.237154	4.46708	7.92939e-06	1.6089e-05
PBANKA_1335600	916.345	1.05888	0.231498	4.57405	4.78389e-06	9.94807e-06
PBANKA_0313700	2209.64	1.05884	0.17142	6.17691	6.53663e-10	1.7717e-09
PBANKA_1422000	760.875	1.05474	0.243259	4.33587	1.45184e-05	2.88051e-05
PBANKA_1105200	6090.48	1.05431	0.187263	5.63014	1.80065e-08	4.43084e-08
PBANKA_0206800	4564.2	1.05226	0.14378	7.31852	2.50714e-13	8.25623e-13
PBANKA_0713100	6872.45	1.0522	0.132111	7.96453	1.65856e-15	6.11294e-15
PBANKA_1361000	6787.5	1.05205	0.133887	7.8577	3.91237e-15	1.41338e-14
PBANKA_1459100	3107.56	1.05072	0.165955	6.33133	2.43055e-10	6.71991e-10
PBANKA_1034600	4569.74	1.05057	0.137961	7.61498	2.63728e-14	9.14532e-14
PBANKA_1362500	2850.91	1.05031	0.168651	6.2277	4.73337e-10	1.29256e-09
PBANKA_1214500	343.239	1.04971	0.476093	2.20484	0.0274654	0.0382267
PBANKA_0407300	14383.1	1.04769	0.135323	7.74214	9.77608e-15	3.45345e-14
PBANKA_0614700	7991.37	1.04684	0.127534	8.20829	2.24356e-16	8.55335e-16
PBANKA_1237800	33766.4	1.04597	0.118618	8.81799	1.16531e-18	4.87233e-18
PBANKA_0827600	6787.71	1.04342	0.137984	7.56184	3.97401e-14	1.366e-13
PBANKA_1352600	13078.4	1.04298	0.126367	8.25363	1.5366e-16	5.9067e-16
PBANKA_0110600	360.601	1.0422	0.40036	2.60317	0.00923664	0.0137525
PBANKA_0204300	1502.6	1.04202	0.206008	5.05817	4.23305e-07	9.53323e-07
PBANKA_0815900	13241.4	1.04149	0.14776	7.04849	1.80876e-12	5.67783e-12
PBANKA_1329800	1427.14	1.04104	0.193662	5.37557	7.63395e-08	1.79948e-07
PBANKA_1008600	2542.36	1.04001	0.158919	6.54427	5.97853e-11	1.72102e-10
PBANKA_0619600	375.708	1.03984	0.354755	2.93115	0.00337707	0.00530697
PBANKA_0508600	10913.5	1.0388	0.121482	8.55102	1.22002e-17	4.92743e-17
PBANKA_0815000	534.397	1.0379	0.318133	3.26246	0.00110449	0.00183041
PBANKA_0914100	4911.84	1.03771	0.143085	7.2524	4.09456e-13	1.33601e-12
PBANKA_0407800	2976.68	1.03729	0.212612	4.87878	1.06746e-06	2.33097e-06
PBANKA_1021200	4324.52	1.03701	0.146065	7.0997	1.25032e-12	3.96389e-12
PBANKA_1036300	5541.89	1.03664	0.150056	6.90835	4.90313e-12	1.50668e-11
PBANKA_0604400	3888.09	1.0332	0.176513	5.85338	4.8168e-09	1.23363e-08
PBANKA_1109600	19313.4	1.03207	0.116399	8.86669	7.5353e-19	3.18455e-18
PBANKA_1034200	347.845	1.03112	0.36317	2.83923	0.0045223	0.00700311
PBANKA_0701300	680.092	1.02979	0.29044	3.54561	0.000391705	0.0006764
PBANKA_1362700	1967.69	1.02967	0.200133	5.14495	2.67589e-07	6.11e-07
PBANKA_0104400	2934.19	1.02823	0.170261	6.0391	1.54981e-09	4.10253e-09
PBANKA_0809800	1284.27	1.02783	0.221912	4.63169	3.62691e-06	7.61981e-06
PBANKA_0702500	2399.53	1.02605	0.196523	5.22102	1.7794e-07	4.11083e-07
PBANKA_1421600	4898.89	1.02368	0.137932	7.42161	1.15708e-13	3.88051e-13
PBANKA_0820200	766.61	1.02318	0.252588	4.05077	5.10488e-05	9.64445e-05
PBANKA_1220600	2332.84	1.02107	0.176773	5.77616	7.64234e-09	1.92417e-08
PBANKA_0212000	772.112	1.02054	0.287596	3.54851	0.000387416	0.000669448
PBANKA_1028900	677.138	1.0187	0.257953	3.94916	7.84243e-05	0.000145629
PBANKA_1237100	21102.1	1.01491	0.121393	8.36057	6.24173e-17	2.4454e-16
PBANKA_0607700	29428.5	1.01378	0.11981	8.46158	2.63771e-17	1.05199e-16
PBANKA_1458600	2053.05	1.01333	0.194576	5.20788	1.9101e-07	4.40479e-07
PBANKA_0719500	5076.12	1.01323	0.137408	7.37389	1.65722e-13	5.51075e-13
PBANKA_1122300	2833.09	1.01317	0.158552	6.39013	1.65741e-10	4.64786e-10
PBANKA_1450000	2383.64	1.0125	0.170667	5.93262	2.98141e-09	7.71987e-09
PBANKA_0932900	1785.63	1.01114	0.180507	5.60166	2.12313e-08	5.19428e-08
PBANKA_0716200	6025.19	1.01104	0.14826	6.81936	9.14441e-12	2.76993e-11
PBANKA_0304500	7385.11	1.00811	0.137022	7.35727	1.87708e-13	6.2135e-13
PBANKA_1330100	3568.6	1.00782	0.174759	5.76691	8.07375e-09	2.02578e-08
PBANKA_1203500	2247.85	1.00769	0.198255	5.08281	3.71886e-07	8.39376e-07
PBANKA_1443700	47923.6	1.00566	0.118561	8.48227	2.20843e-17	8.84237e-17
PBANKA_1306100	1243.58	1.00566	0.21573	4.66167	3.1366e-06	6.62518e-06
PBANKA_0607900	1978.08	1.00305	0.188789	5.31305	1.07804e-07	2.5202e-07
PBANKA_1032400	22463.6	1.0025	0.119009	8.42376	3.64587e-17	1.44503e-16
PBANKA_0507800	17670.8	1.00249	0.1236	8.11076	5.03034e-16	1.88675e-15
PBANKA_1104400	6568.51	1.00234	0.143023	7.00821	2.41389e-12	7.52643e-12
PBANKA_1312800	16463.7	1.00205	0.130229	7.69447	1.42078e-14	4.96738e-14
PBANKA_1113100	1638.79	1.00144	0.19727	5.0765	3.84457e-07	8.66984e-07
PBANKA_0308300	3874.01	1.00121	0.167202	5.98804	2.12383e-09	5.55289e-09
PBANKA_0605900	4194.61	1.00068	0.142716	7.01166	2.35511e-12	7.35216e-12
PBANKA_0111900	978.764	1.00007	0.223849	4.46759	7.91054e-06	1.60572e-05
PBANKA_0612700	1558.68	0.99942	0.200343	4.98854	6.08371e-07	1.3522e-06
PBANKA_1444500	3916.95	0.999126	0.159532	6.26285	3.77998e-10	1.03721e-09
PBANKA_1011700	4659.76	0.998361	0.14217	7.02233	2.18205e-12	6.82444e-12
PBANKA_0907400	3209.31	0.998029	0.169292	5.8953	3.74001e-09	9.64499e-09
PBANKA_1231400	4899.74	0.997547	0.140852	7.08224	1.41838e-12	4.46891e-12
PBANKA_0801500	6207.49	0.995334	0.136754	7.27827	3.38141e-13	1.10568e-12
PBANKA_1227100	5805.59	0.99525	0.143275	6.94642	3.74662e-12	1.15547e-11
PBANKA_0406400	1962.87	0.994937	0.171605	5.79783	6.71778e-09	1.69977e-08
PBANKA_1038600	15420.7	0.994715	0.129706	7.66899	1.73354e-14	6.04843e-14
PBANKA_0412500	1703.35	0.994679	0.220723	4.50646	6.59168e-06	1.34874e-05
PBANKA_1211400	1995.4	0.993227	0.183893	5.40113	6.62242e-08	1.56683e-07
PBANKA_0308200	2211.37	0.990012	0.165487	5.9824	2.19876e-09	5.73997e-09
PBANKA_1330000	4302.23	0.989106	0.180458	5.4811	4.22698e-08	1.01324e-07
PBANKA_0829600	1299.84	0.988455	0.267914	3.68945	0.000224737	0.000400134
PBANKA_1226000	1338.64	0.988209	0.201945	4.89346	9.90761e-07	2.17277e-06
PBANKA_1323500	573.21	0.988046	0.278525	3.54742	0.000389023	0.000671997
PBANKA_1208600	1502.88	0.986147	0.202032	4.88114	1.05473e-06	2.30611e-06
PBANKA_0202700	11747.7	0.985248	0.137466	7.16721	7.6544e-13	2.46341e-12
PBANKA_0922900	6112.51	0.984546	0.143051	6.88251	5.88082e-12	1.8006e-11
PBANKA_1329200	15257.4	0.984047	0.117687	8.36158	6.18823e-17	2.4263e-16
PBANKA_0932800	1790.94	0.980855	0.206987	4.73873	2.15059e-06	4.60543e-06
PBANKA_0100800	18967.4	0.980094	0.126767	7.73147	1.06314e-14	3.7478e-14
PBANKA_1422500	2286.39	0.979961	0.178517	5.48947	4.03138e-08	9.68633e-08
PBANKA_1428100	4468.15	0.979477	0.139855	7.0035	2.49646e-12	7.76965e-12
PBANKA_1018300	4984.28	0.979408	0.155584	6.29506	3.07286e-10	8.47279e-10
PBANKA_0902400	5667.63	0.979029	0.144304	6.7845	1.16486e-11	3.5035e-11
PBANKA_0707200	6113.32	0.97843	0.149506	6.54443	5.97233e-11	1.72021e-10
PBANKA_0824300	10084.3	0.976508	0.126626	7.71174	1.24117e-14	4.35735e-14
PBANKA_1464900	2788.73	0.976465	0.161116	6.06062	1.35601e-09	3.6139e-09
PBANKA_0604900	2057.67	0.975847	0.169613	5.75336	8.74856e-09	2.19187e-08
PBANKA_0923000	6140.4	0.975817	0.138808	7.02999	2.06542e-12	6.47157e-12
PBANKA_1118100	3205.8	0.97408	0.152676	6.38004	1.77038e-10	4.95648e-10
PBANKA_0621300	12197.2	0.974012	0.129789	7.50459	6.16221e-14	2.09696e-13
PBANKA_0612600	801.002	0.973788	0.253771	3.83728	0.000124406	0.000226885
PBANKA_0514000	7081.3	0.973721	0.131836	7.38586	1.51473e-13	5.05669e-13
PBANKA_1312000	4868.84	0.972703	0.148682	6.54219	6.0626e-11	1.74424e-10
PBANKA_0708500	3244.37	0.970706	0.167769	5.78597	7.2094e-09	1.82055e-08
PBANKA_1138800	2189.4	0.970359	0.168224	5.76827	8.0089e-09	2.01248e-08
PBANKA_0616700	29508.6	0.967291	0.124814	7.74984	9.20094e-15	3.25479e-14
PBANKA_0212600	5909.99	0.966409	0.133812	7.22212	5.11828e-13	1.65978e-12
PBANKA_1355600	1080.92	0.966159	0.239849	4.02819	5.62071e-05	0.000105837
PBANKA_0505700	5388.33	0.962019	0.133761	7.19209	6.38077e-13	2.05872e-12
PBANKA_0601200	9937.08	0.958533	0.125503	7.63756	2.21383e-14	7.6926e-14
PBANKA_0802900	349.182	0.95624	0.357324	2.67611	0.00744821	0.0112539
PBANKA_1344200	8178.59	0.951022	0.136259	6.97954	2.96155e-12	9.1891e-12
PBANKA_0822900	16275.8	0.950155	0.127555	7.449	9.40513e-14	3.17509e-13
PBANKA_1121400	3439.48	0.949208	0.149036	6.36899	1.90274e-10	5.30956e-10
PBANKA_0613600	1701.49	0.945494	0.215976	4.37778	1.19892e-05	2.39738e-05
PBANKA_0509500	9532.37	0.945357	0.154658	6.11257	9.80368e-10	2.63342e-09
PBANKA_1301800	8792.43	0.94416	0.125822	7.50393	6.19322e-14	2.10568e-13
PBANKA_0822700	3558.18	0.942086	0.1613	5.84059	5.20153e-09	1.32665e-08
PBANKA_1216800	26453.4	0.941492	0.142442	6.60966	3.85212e-11	1.12092e-10
PBANKA_1141500	4487.74	0.941201	0.145989	6.44707	1.14035e-10	3.22983e-10
PBANKA_1404500	411.172	0.941099	0.357586	2.63181	0.00849309	0.012716
PBANKA_1114300	5910.16	0.940669	0.157881	5.9581	2.55184e-09	6.6413e-09
PBANKA_1343800	3723.79	0.940523	0.161314	5.83038	5.53001e-09	1.40691e-08
PBANKA_1323300	15026.1	0.938027	0.126286	7.42782	1.10404e-13	3.70751e-13
PBANKA_0936600	2024.37	0.937478	0.169714	5.52388	3.31591e-08	8.00495e-08
PBANKA_0208500	2699.58	0.937397	0.172945	5.42019	5.95345e-08	1.41183e-07
PBANKA_1407500	1615.7	0.936416	0.225549	4.15172	3.29985e-05	6.3304e-05
PBANKA_1337900	2500.85	0.932151	0.167707	5.5582	2.72568e-08	6.61766e-08
PBANKA_1457000	1401.66	0.931919	0.195937	4.75622	1.97255e-06	4.24376e-06
PBANKA_0503100	1694.94	0.931701	0.207293	4.49461	6.96974e-06	1.42268e-05
PBANKA_0830900	5783.56	0.931601	0.140286	6.64071	3.12176e-11	9.13602e-11
PBANKA_1418100	10570.7	0.930913	0.128474	7.24591	4.29553e-13	1.3992e-12
PBANKA_1107000	1687.92	0.92924	0.205428	4.52343	6.08445e-06	1.25148e-05
PBANKA_0917500	9076.04	0.928161	0.123117	7.53887	4.74051e-14	1.62509e-13
PBANKA_0210100	8864.99	0.926973	0.12544	7.38979	1.47056e-13	4.91247e-13
PBANKA_1339600	19264.5	0.925349	0.127066	7.28245	3.27819e-13	1.07399e-12
PBANKA_0620800	3439.17	0.924697	0.156268	5.91738	3.27106e-09	8.45272e-09
PBANKA_1322200	7827.59	0.922776	0.140998	6.54461	5.96492e-11	1.71904e-10
PBANKA_1208800	20437.2	0.921937	0.138552	6.65407	2.85091e-11	8.36256e-11
PBANKA_1105300	517.815	0.921513	0.313345	2.94089	0.00327274	0.00516051
PBANKA_1226700	905.972	0.921277	0.231277	3.98343	6.79263e-05	0.000126781
PBANKA_0811500	829.344	0.918776	0.243219	3.77757	0.000158367	0.000285532
PBANKA_0509700	5836.74	0.918148	0.131985	6.95644	3.48982e-12	1.07888e-11
PBANKA_0925100	8838.87	0.917523	0.133222	6.88718	5.69102e-12	1.74563e-11
PBANKA_0936700	4535.39	0.916724	0.151547	6.0491	1.45655e-09	3.86569e-09
PBANKA_0820800	4374.97	0.914816	0.148578	6.15713	7.40756e-10	2.00137e-09
PBANKA_1035900	6445.5	0.914453	0.166049	5.50712	3.6475e-08	8.78881e-08
PBANKA_1326100	21588	0.912442	0.118046	7.72952	1.0795e-14	3.80285e-14
PBANKA_1105900	1564.27	0.912172	0.213252	4.27743	1.89061e-05	3.71352e-05
PBANKA_1328900	3442.1	0.91215	0.179066	5.09393	3.50711e-07	7.93097e-07
PBANKA_1417000	1418.77	0.910792	0.226231	4.02594	5.67493e-05	0.000106779
PBANKA_0112300	3047.16	0.90619	0.16996	5.33178	9.72554e-08	2.27882e-07
PBANKA_0414900	4498.78	0.905464	0.157746	5.74	9.4678e-09	2.36974e-08
PBANKA_0305900	6349	0.905238	0.133781	6.76655	1.31886e-11	3.9504e-11
PBANKA_1431300	5733.03	0.904843	0.135069	6.6991	2.09713e-11	6.21945e-11
PBANKA_1119800	839.341	0.903881	0.33996	2.65878	0.00784236	0.011811
PBANKA_0202000	9850.88	0.903132	0.154293	5.85336	4.81745e-09	1.23363e-08
PBANKA_1212700	21035.7	0.897917	0.129214	6.94906	3.67734e-12	1.13548e-11
PBANKA_1429500	7443.73	0.897178	0.15364	5.8395	5.23578e-09	1.33405e-08
PBANKA_0506900	16524.6	0.896326	0.120948	7.41083	1.25512e-13	4.20379e-13
PBANKA_0515200	1378.74	0.895565	0.219638	4.07746	4.55312e-05	8.63401e-05
PBANKA_0929100	7586.88	0.894542	0.142543	6.27558	3.48334e-10	9.5839e-10
PBANKA_0105700	8986.86	0.894199	0.123519	7.23935	4.50842e-13	1.46761e-12
PBANKA_1356100	9070.45	0.894081	0.135229	6.6116	3.80187e-11	1.10756e-10
PBANKA_1426600	1421.29	0.892708	0.201234	4.43616	9.15765e-06	1.84637e-05
PBANKA_1308000	20240.1	0.892299	0.11807	7.55738	4.11262e-14	1.41269e-13
PBANKA_1113500	16921.5	0.890836	0.122336	7.28187	3.29225e-13	1.0779e-12
PBANKA_0506800	4365.81	0.888176	0.140096	6.33976	2.30124e-10	6.37969e-10
PBANKA_1107100	11327	0.886373	0.123771	7.16142	7.98436e-13	2.56637e-12
PBANKA_0605500	5949.9	0.886014	0.132679	6.67785	2.42467e-11	7.15341e-11
PBANKA_0910800	2801.68	0.884488	0.171326	5.1626	2.43549e-07	5.57355e-07
PBANKA_1420100	1859.12	0.884249	0.187636	4.71259	2.4459e-06	5.2203e-06
PBANKA_1031500	3561.1	0.883837	0.168426	5.24762	1.54076e-07	3.57409e-07
PBANKA_1029700	10226.2	0.883232	0.123474	7.15319	8.47867e-13	2.71669e-12
PBANKA_1125200	2494.99	0.88105	0.171203	5.14622	2.65791e-07	6.07165e-07
PBANKA_1427600	3814.62	0.880121	0.157121	5.60156	2.12435e-08	5.19479e-08
PBANKA_1344100	6109.46	0.878515	0.142802	6.15198	7.65223e-10	2.06529e-09
PBANKA_1343700	18951.7	0.876652	0.117664	7.45048	9.30034e-14	3.14179e-13
PBANKA_0903200	989.501	0.876406	0.221508	3.95655	7.60395e-05	0.000141509
PBANKA_1432600	2397.54	0.876078	0.167927	5.21702	1.81821e-07	4.19859e-07
PBANKA_0934700	21059.8	0.875864	0.130916	6.69026	2.2277e-11	6.59518e-11
PBANKA_0313400	3040.31	0.875679	0.162231	5.39772	6.74925e-08	1.59536e-07
PBANKA_1432900	5411.63	0.874444	0.133675	6.54158	6.08722e-11	1.75033e-10
PBANKA_1214800	21231.8	0.873793	0.116673	7.48924	6.92744e-14	2.35109e-13
PBANKA_1361800	12415.7	0.872136	0.119042	7.32632	2.36555e-13	7.795e-13
PBANKA_0926800	1326.84	0.871512	0.240998	3.61626	0.000298893	0.000525019
PBANKA_1244200	9262.45	0.871296	0.139775	6.23356	4.55945e-10	1.24706e-09
PBANKA_1306900	9504.97	0.870819	0.122437	7.11237	1.14066e-12	3.62072e-12
PBANKA_0715000	11024	0.869126	0.122501	7.09482	1.29518e-12	4.09339e-12
PBANKA_1313400	747.582	0.869074	0.25425	3.41818	0.000630414	0.00107049
PBANKA_0513100	840.868	0.868976	0.234326	3.70841	0.000208562	0.000372114
PBANKA_0712000	7300.04	0.866501	0.147741	5.86501	4.49094e-09	1.15233e-08
PBANKA_1003200	2736.87	0.865768	0.155841	5.55545	2.76904e-08	6.71654e-08
PBANKA_0828400	7213.06	0.864509	0.141667	6.1024	1.04487e-09	2.7993e-09
PBANKA_1216700	3044.29	0.864189	0.176942	4.88402	1.03946e-06	2.27565e-06
PBANKA_1444200	12237.7	0.863874	0.13259	6.51539	7.2502e-11	2.07305e-10
PBANKA_1140300	5064.6	0.862603	0.142714	6.0443	1.50064e-09	3.97858e-09
PBANKA_1434400	19150.5	0.862215	0.123923	6.95765	3.46003e-12	1.07032e-11
PBANKA_0417400	16694.4	0.860344	0.13945	6.16954	6.84888e-10	1.85239e-09
PBANKA_1123300	5101.08	0.860195	0.218775	3.93188	8.42858e-05	0.000156115
PBANKA_0403600	10776.2	0.859889	0.123147	6.98262	2.89735e-12	8.99537e-12
PBANKA_0810200	6142.64	0.858699	0.133864	6.41471	1.4109e-10	3.97187e-10
PBANKA_1136100	4327.2	0.858071	0.142109	6.03813	1.55908e-09	4.12494e-09
PBANKA_1416900	17301.1	0.852639	0.124345	6.85702	7.03125e-12	2.14256e-11
PBANKA_0823300	8452.31	0.852624	0.128536	6.63337	3.28105e-11	9.5967e-11
PBANKA_1208000	2361.11	0.851722	0.188421	4.52031	6.17492e-06	1.26907e-05
PBANKA_1354800	8416.68	0.851629	0.142506	5.97608	2.28564e-09	5.9637e-09
PBANKA_0413500	15482.7	0.851239	0.11974	7.10909	1.16811e-12	3.70555e-12
PBANKA_1129200	846.487	0.850497	0.262002	3.24614	0.00116981	0.00193301
PBANKA_1320200	24754.6	0.850108	0.132252	6.42795	1.29338e-10	3.64705e-10
PBANKA_1112500	1591.28	0.848918	0.20727	4.09571	4.2087e-05	8.01065e-05
PBANKA_1415100	11898	0.846282	0.122149	6.92826	4.26062e-12	1.31082e-11
PBANKA_1433200	1484.84	0.844132	0.194777	4.33384	1.46531e-05	2.90273e-05
PBANKA_1334600	4562.79	0.843272	0.154025	5.4749	4.37769e-08	1.04838e-07
PBANKA_1115700	13927.1	0.843196	0.117234	7.19241	6.36561e-13	2.05512e-12
PBANKA_1029000	3341.14	0.842848	0.156405	5.3889	7.08907e-08	1.67336e-07
PBANKA_1028000	5699.97	0.842219	0.15015	5.60919	2.03277e-08	4.978e-08
PBANKA_0210200	17330.2	0.841876	0.12872	6.54038	6.1362e-11	1.76342e-10
PBANKA_0713600	809.543	0.840507	0.246676	3.40734	0.000656001	0.00111134
PBANKA_1362100	3630.87	0.838858	0.144988	5.78571	7.22084e-09	1.82254e-08
PBANKA_0907700	6087.03	0.837534	0.131632	6.36269	1.98253e-10	5.52316e-10
PBANKA_0308700	801.929	0.837487	0.26252	3.19018	0.00142183	0.00233282
PBANKA_1105700	5730.32	0.837269	0.161284	5.19126	2.08871e-07	4.80799e-07
PBANKA_1336800	1177.74	0.83718	0.235824	3.55002	0.000385195	0.00066606
PBANKA_0829900	6558.05	0.836889	0.130019	6.43667	1.22123e-10	3.44932e-10
PBANKA_1128900	3019.48	0.836262	0.165803	5.04369	4.56638e-07	1.02658e-06
PBANKA_1010300	6445.6	0.835794	0.132314	6.31676	2.6711e-10	7.37299e-10
PBANKA_1033700	9779.58	0.835565	0.135406	6.17082	6.79354e-10	1.83938e-09
PBANKA_0818200	1628.59	0.835198	0.183367	4.55479	5.24388e-06	1.08692e-05
PBANKA_1017500	1317.55	0.834973	0.197558	4.22648	2.37377e-05	4.62161e-05
PBANKA_0937300	5351.45	0.833061	0.148515	5.60927	2.03176e-08	4.97792e-08
PBANKA_0913600	2095.26	0.832855	0.192254	4.33206	1.47721e-05	2.92517e-05
PBANKA_1426500	5789.8	0.832208	0.142234	5.85096	4.88745e-09	1.25029e-08
PBANKA_0607200	608.596	0.830876	0.283655	2.92918	0.00339862	0.0053392
PBANKA_0615100	3452.93	0.829711	0.179608	4.61958	3.84525e-06	8.06191e-06
PBANKA_0620100	4750.6	0.829478	0.14742	5.62664	1.83751e-08	4.51499e-08
PBANKA_0802400	593.207	0.829231	0.306911	2.70186	0.0068953	0.0104619
PBANKA_0916900	2016.26	0.824017	0.175781	4.68775	2.76226e-06	5.8685e-06
PBANKA_0112641	4417.34	0.822412	0.139501	5.89539	3.73795e-09	9.64454e-09
PBANKA_1438800	2068.93	0.817391	0.182485	4.47924	7.49106e-06	1.52299e-05
PBANKA_1245300	5512.1	0.815531	0.140458	5.80623	6.38961e-09	1.61995e-08
PBANKA_0818100	1578.24	0.813019	0.187241	4.3421	1.41128e-05	2.80551e-05
PBANKA_1037900	4885.2	0.812734	0.14338	5.66838	1.4415e-08	3.56082e-08
PBANKA_0519600	4777.91	0.812491	0.15584	5.21363	1.85184e-07	4.27237e-07
PBANKA_0807900	23431.2	0.812491	0.149009	5.45263	4.96313e-08	1.1847e-07
PBANKA_1125800	3683.09	0.811959	0.166373	4.88035	1.05898e-06	2.31343e-06
PBANKA_0941400	3076.49	0.811824	0.156425	5.18986	2.10454e-07	4.83571e-07
PBANKA_0501400	540.082	0.810205	0.277793	2.91658	0.00353896	0.005546
PBANKA_0410200	1032.67	0.809931	0.269512	3.00518	0.00265426	0.00423635
PBANKA_0709000	54960.9	0.805896	0.140243	5.74642	9.11524e-09	2.28261e-08
PBANKA_0927400	7628.49	0.805861	0.130589	6.17096	6.78787e-10	1.83882e-09
PBANKA_1239400	4987.2	0.804655	0.138761	5.79886	6.67669e-09	1.69021e-08
PBANKA_1433400	383.256	0.804539	0.358201	2.24605	0.0247005	0.0346666
PBANKA_1137700	11394.9	0.804466	0.124881	6.44185	1.18027e-10	3.33735e-10
PBANKA_0315300	2795.6	0.804015	0.166772	4.82104	1.4281e-06	3.0933e-06
PBANKA_1036200	9664.11	0.803522	0.138554	5.79935	6.65731e-09	1.68614e-08
PBANKA_0927500	4875.79	0.803426	0.155307	5.17315	2.30177e-07	5.27463e-07
PBANKA_0519200	2562.64	0.802914	0.199913	4.01632	5.91132e-05	0.000111022
PBANKA_1103800	4782.17	0.801899	0.140696	5.69951	1.2015e-08	2.98677e-08
PBANKA_1341000	6451.89	0.800652	0.132156	6.05837	1.37505e-09	3.66081e-09
PBANKA_1019100	1451.15	0.798356	0.196778	4.05713	4.9679e-05	9.39958e-05
PBANKA_1447100	2678.43	0.798227	0.160981	4.95851	7.10354e-07	1.56998e-06
PBANKA_0914900	1809.31	0.797749	0.216757	3.68039	0.000232877	0.000413472
PBANKA_0502900	1142.48	0.797091	0.213203	3.73864	0.000185015	0.000331609
PBANKA_1018000	841.881	0.795274	0.234613	3.38973	0.000699613	0.00118052
PBANKA_0410400	6101.56	0.794264	0.150575	5.27487	1.32847e-07	3.08586e-07
PBANKA_0609100	4418.52	0.794195	0.18104	4.38685	1.15003e-05	2.30593e-05
PBANKA_1201300	11197.5	0.793634	0.138483	5.73092	9.98897e-09	2.49529e-08
PBANKA_0505500	5736.77	0.793389	0.133804	5.92949	3.03884e-09	7.8606e-09
PBANKA_0209500	5677.42	0.793049	0.14219	5.57738	2.44164e-08	5.94785e-08
PBANKA_1361600	9025.57	0.79287	0.124067	6.39066	1.65171e-10	4.63441e-10
PBANKA_1329000	5712.94	0.792651	0.145702	5.44023	5.32109e-08	1.2654e-07
PBANKA_1113400	33387	0.792064	0.11789	6.71869	1.8336e-11	5.4474e-11
PBANKA_1119900	2018.78	0.791472	0.224823	3.52042	0.00043086	0.000741253
PBANKA_0902300	7633.79	0.791283	0.135388	5.84456	5.07895e-09	1.29798e-08
PBANKA_0717700	2698.06	0.790973	0.203184	3.8929	9.90543e-05	0.000182344
PBANKA_0303900	4265.98	0.789499	0.144884	5.44919	5.06009e-08	1.20615e-07
PBANKA_1142700	19160	0.788564	0.115304	6.839	7.97482e-12	2.42284e-11
PBANKA_1454200	18268.2	0.787541	0.132154	5.95927	2.53374e-09	6.59756e-09
PBANKA_1419000	3672.51	0.78467	0.159104	4.93181	8.14729e-07	1.79444e-06
PBANKA_1001400	33388.8	0.78387	0.127819	6.13265	8.64263e-10	2.32521e-09
PBANKA_0827100	18942.4	0.782031	0.11469	6.81863	9.19106e-12	2.78241e-11
PBANKA_1315000	10069.2	0.781658	0.121612	6.42747	1.29748e-10	3.65659e-10
PBANKA_0928900	2914.4	0.78003	0.161883	4.81848	1.44658e-06	3.132e-06
PBANKA_0936300	1217.05	0.778444	0.239549	3.24962	0.00115558	0.00191197
PBANKA_1302700	3984.04	0.776964	0.146184	5.31499	1.06664e-07	2.49584e-07
PBANKA_0810100	499.174	0.776124	0.289832	2.67784	0.00740982	0.0111993
PBANKA_0707500	9984.29	0.775805	0.126503	6.13271	8.63963e-10	2.32521e-09
PBANKA_1113600	6068.18	0.775557	0.138088	5.61639	1.94991e-08	4.78197e-08
PBANKA_0702100	1934.42	0.775083	0.178385	4.34499	1.39282e-05	2.77205e-05
PBANKA_1304500	49755.3	0.774588	0.116185	6.66683	2.61384e-11	7.69371e-11
PBANKA_0103000	3009.84	0.774584	0.151851	5.10094	3.37968e-07	7.6553e-07
PBANKA_1331200	5440.96	0.772941	0.136659	5.65596	1.54975e-08	3.82082e-08
PBANKA_0802200	768.663	0.771441	0.269695	2.86042	0.00423085	0.00658175
PBANKA_0810000	3589.79	0.770747	0.147369	5.23007	1.6945e-07	3.92181e-07
PBANKA_1009500	25179.4	0.769745	0.133097	5.78334	7.32303e-09	1.8465e-08
PBANKA_1338500	2645.2	0.769632	0.15707	4.89993	9.58732e-07	2.10616e-06
PBANKA_1242400	40409	0.769376	0.124105	6.19938	5.66869e-10	1.54383e-09
PBANKA_1357800	11348.7	0.769159	0.134895	5.7019	1.1848e-08	2.94669e-08
PBANKA_1108600	21940	0.76852	0.137311	5.59694	2.18163e-08	5.3323e-08
PBANKA_1025400	3563.2	0.768456	0.148768	5.16548	2.39828e-07	5.49087e-07
PBANKA_1132800	4906.66	0.76801	0.139466	5.50679	3.65437e-08	8.80119e-08
PBANKA_1207900	3253.12	0.767954	0.150861	5.09047	3.57173e-07	8.0724e-07
PBANKA_1349400	3703	0.765391	0.149009	5.13654	2.79842e-07	6.38121e-07
PBANKA_0516100	1988.99	0.763351	0.207996	3.67002	0.000242528	0.00042956
PBANKA_1023600	29216	0.763054	0.135387	5.63608	1.73969e-08	4.28496e-08
PBANKA_0618500	5314.36	0.761795	0.143963	5.29159	1.21258e-07	2.8218e-07
PBANKA_0834200	1818.41	0.759387	0.180714	4.20215	2.64395e-05	5.12027e-05
PBANKA_1363300	1393.93	0.75896	0.193091	3.93058	8.47415e-05	0.000156902
PBANKA_1324800	2019.38	0.757908	0.180176	4.20648	2.5938e-05	5.02506e-05
PBANKA_0811400	6163.74	0.757109	0.139997	5.40803	6.37209e-08	1.50831e-07
PBANKA_1335100	3281.62	0.75708	0.179426	4.21945	2.44901e-05	4.7572e-05
PBANKA_1447900	13344.5	0.75522	0.138852	5.43902	5.35753e-08	1.27348e-07
PBANKA_0213600	3994.72	0.754285	0.16851	4.47619	7.59872e-06	1.54427e-05
PBANKA_1227200	7296.34	0.753503	0.131895	5.71292	1.11053e-08	2.76873e-08
PBANKA_1322900	2174.96	0.752861	0.173032	4.35099	1.35525e-05	2.69938e-05
PBANKA_1348200	2719.03	0.75189	0.166401	4.51853	6.22704e-06	1.27823e-05
PBANKA_1127100	1841.22	0.750826	0.199068	3.77171	0.000162133	0.000292034
PBANKA_0314100	7951	0.750774	0.132224	5.67804	1.36249e-08	3.37545e-08
PBANKA_0506600	42942.8	0.750705	0.165179	4.54479	5.49909e-06	1.13704e-05
PBANKA_1113300	4992.84	0.749318	0.143266	5.23025	1.69282e-07	3.91969e-07
PBANKA_0213000	28047.8	0.748585	0.146226	5.11936	3.0657e-07	6.96887e-07
PBANKA_1340700	1994.25	0.748385	0.179544	4.16826	3.06932e-05	5.91707e-05
PBANKA_1454800	20084.9	0.747791	0.12733	5.87287	4.28313e-09	1.10122e-08
PBANKA_1308600	112460	0.746836	0.121776	6.13289	8.62964e-10	2.32417e-09
PBANKA_1437500	5265.16	0.746593	0.168266	4.43698	9.12304e-06	1.84012e-05
PBANKA_0833900	3617.58	0.746441	0.150845	4.9484	7.48259e-07	1.65161e-06
PBANKA_0416100	18493.2	0.746043	0.118871	6.27605	3.47275e-10	9.56506e-10
PBANKA_1242900	785.636	0.742539	0.246679	3.01014	0.00261125	0.00416902
PBANKA_1321600	4530.58	0.742291	0.142103	5.22359	1.75485e-07	4.05596e-07
PBANKA_0823700	1403.18	0.741907	0.197686	3.75296	0.000174757	0.000314107
PBANKA_0600800	2450.45	0.741179	0.164791	4.4977	6.86929e-06	1.40273e-05
PBANKA_1352400	6104.14	0.740047	0.155067	4.77245	1.81998e-06	3.92215e-06
PBANKA_1329600	5114.04	0.739556	0.139642	5.2961	1.18302e-07	2.75677e-07
PBANKA_0814800	2604.16	0.738634	0.184264	4.00855	6.10919e-05	0.000114528
PBANKA_0506300	3217.15	0.736453	0.153269	4.80496	1.5478e-06	3.34406e-06
PBANKA_1115600	5016.39	0.73623	0.142287	5.17425	2.2883e-07	5.24611e-07
PBANKA_0803300	1424.5	0.735563	0.19456	3.78066	0.000156414	0.000282232
PBANKA_1423100	3990.53	0.735468	0.152949	4.8086	1.51992e-06	3.28521e-06
PBANKA_1204600	1089.77	0.734588	0.231486	3.17336	0.00150685	0.00246756
PBANKA_0301700	3605.74	0.734584	0.166565	4.41019	1.03281e-05	2.07497e-05
PBANKA_1316500	6453.18	0.733544	0.14644	5.00918	5.46615e-07	1.21812e-06
PBANKA_1118500	5799.52	0.733356	0.137571	5.33073	9.78178e-08	2.29095e-07
PBANKA_0708200	18336.9	0.732491	0.138311	5.29599	1.18376e-07	2.75724e-07
PBANKA_1216200	1365.71	0.731112	0.220614	3.31399	0.000919751	0.00153422
PBANKA_1402400	10023.2	0.730616	0.131597	5.55193	2.82527e-08	6.84967e-08
PBANKA_1217100	1990.9	0.730021	0.175907	4.15005	3.32407e-05	6.37447e-05
PBANKA_0104600	9799.04	0.727557	0.123199	5.90556	3.51452e-09	9.07724e-09
PBANKA_0207400	2307.51	0.727191	0.16296	4.46239	8.10511e-06	1.64325e-05
PBANKA_1336900	8994.4	0.725164	0.125908	5.75949	8.43665e-09	2.11476e-08
PBANKA_0211700	1378.24	0.723403	0.193512	3.73828	0.000185285	0.000331976
PBANKA_1113800	2779	0.722974	0.160222	4.51233	6.4118e-06	1.31457e-05
PBANKA_1118200	4771.1	0.722532	0.151796	4.75988	1.93707e-06	4.17095e-06
PBANKA_1312200	5390.96	0.722272	0.144092	5.01257	5.37078e-07	1.19739e-06
PBANKA_1307700	4890.98	0.721934	0.166061	4.34741	1.37756e-05	2.74275e-05
PBANKA_0216741	955.601	0.721828	0.301573	2.39354	0.0166865	0.0240377
PBANKA_0931100	30551.9	0.72092	0.120398	5.98778	2.12719e-09	5.55882e-09
PBANKA_1438400	11769.6	0.7208	0.120172	5.9981	1.99643e-09	5.2332e-09
PBANKA_0902000	4989.62	0.720425	0.14738	4.88821	1.01758e-06	2.23064e-06
PBANKA_1109400	8449.46	0.719	0.131334	5.47459	4.38528e-08	1.04971e-07
PBANKA_1230100	23192.6	0.718581	0.1319	5.44792	5.09628e-08	1.21421e-07
PBANKA_1215700	9664.89	0.718392	0.142934	5.02606	5.00661e-07	1.12057e-06
PBANKA_0507900	2064	0.717156	0.179196	4.00207	6.27899e-05	0.000117581
PBANKA_0937900	3860.66	0.716487	0.188438	3.80224	0.000143392	0.000259745
PBANKA_1013300	2279.67	0.71549	0.16676	4.29054	1.78238e-05	3.51039e-05
PBANKA_1407400	11089.1	0.714735	0.139419	5.12652	2.9514e-07	6.72402e-07
PBANKA_1304300	6111.99	0.713456	0.142332	5.01262	5.36948e-07	1.19739e-06
PBANKA_0520100	11830.4	0.712755	0.120423	5.91877	3.24349e-09	8.38572e-09
PBANKA_1216000	1502.41	0.709601	0.205182	3.4584	0.000543392	0.000928902
PBANKA_1009800	3961.47	0.708023	0.147008	4.81623	1.46294e-06	3.16608e-06
PBANKA_1304100	1814	0.707905	0.179807	3.93704	8.24939e-05	0.000152908
PBANKA_1012500	12712.3	0.706885	0.120137	5.88397	4.00543e-09	1.03086e-08
PBANKA_0702400	8607.43	0.706547	0.137787	5.12781	2.93129e-07	6.6812e-07
PBANKA_0306900	21009.9	0.705965	0.126713	5.57137	2.52745e-08	6.14514e-08
PBANKA_0708600	1610.73	0.705256	0.245987	2.86705	0.00414316	0.00645123
PBANKA_0931900	3639.37	0.702031	0.147795	4.75004	2.03377e-06	4.36627e-06
PBANKA_0621600	4195.68	0.701853	0.177697	3.94972	7.8242e-05	0.000145343
PBANKA_1109200	1966.83	0.701666	0.221736	3.16442	0.00155394	0.00254223
PBANKA_1134400	6515.95	0.70091	0.134418	5.21443	1.84385e-07	4.25588e-07
PBANKA_1317600	1802.73	0.700365	0.181865	3.85101	0.00011763	0.000215141
PBANKA_1462900	6141.77	0.699462	0.138867	5.03693	4.73065e-07	1.06211e-06
PBANKA_1132900	2964.9	0.697355	0.163007	4.27808	1.88514e-05	3.70421e-05
PBANKA_0941200	3116.29	0.694084	0.161584	4.2955	1.74304e-05	3.43689e-05
PBANKA_0928000	2688.38	0.690276	0.161149	4.28347	1.83998e-05	3.61686e-05
PBANKA_0104000	22886.2	0.690056	0.125651	5.49185	3.97753e-08	9.56144e-08
PBANKA_0712700	693.883	0.689421	0.310373	2.22127	0.026333	0.0367811
PBANKA_0910300	4796.16	0.688841	0.148714	4.63199	3.62176e-06	7.61211e-06
PBANKA_0833200	6768.59	0.687544	0.139055	4.94441	7.63751e-07	1.68435e-06
PBANKA_1135300	910.96	0.686151	0.236266	2.90415	0.00368255	0.00576217
PBANKA_0202500	4572.33	0.684286	0.189425	3.61245	0.00030332	0.000532428
PBANKA_1238300	9148.2	0.682597	0.135003	5.05615	4.27796e-07	9.63012e-07
PBANKA_1364800	852.3	0.68218	0.240932	2.83142	0.00463412	0.00715455
PBANKA_0606400	906.532	0.6818	0.251238	2.71377	0.00665228	0.0101082
PBANKA_1031600	5636.14	0.680416	0.161433	4.21486	2.49935e-05	4.84761e-05
PBANKA_0509600	1661.03	0.680068	0.198144	3.43219	0.000598738	0.00101907
PBANKA_0619000	2146.68	0.679848	0.175767	3.8679	0.000109777	0.00020143
PBANKA_1433900	774.428	0.679077	0.241075	2.81687	0.00484943	0.00745762
PBANKA_1240400	984.821	0.678276	0.22719	2.9855	0.00283116	0.004506
PBANKA_0111400	14223.7	0.676323	0.117135	5.77388	7.74679e-09	1.9495e-08
PBANKA_0315500	2687.82	0.675889	0.160915	4.2003	2.66566e-05	5.16035e-05
PBANKA_0504200	6947.41	0.675789	0.155863	4.33579	1.45239e-05	2.88051e-05
PBANKA_1463000	37392.4	0.675625	0.114723	5.88917	3.88149e-09	1.00048e-08
PBANKA_1326200	1306.29	0.675247	0.212032	3.18465	0.00144931	0.00237562
PBANKA_0302300	1642.28	0.674939	0.191013	3.53347	0.000410141	0.000707518
PBANKA_1347200	2694.95	0.673647	0.159621	4.22028	2.43996e-05	4.74322e-05
PBANKA_1459400	10285.6	0.671449	0.125363	5.35605	8.50616e-08	2.00138e-07
PBANKA_1017600	2914.75	0.671181	0.158622	4.23133	2.32314e-05	4.53167e-05
PBANKA_1462800	2461.65	0.668525	0.161503	4.13941	3.48203e-05	6.66987e-05
PBANKA_1231100	2157.75	0.668413	0.167631	3.98742	6.67966e-05	0.000124809
PBANKA_0901300.2	2751.93	0.6682	0.167624	3.98631	6.71089e-05	0.000125301
PBANKA_0508800	3123.8	0.666556	0.18919	3.52321	0.000426351	0.000733991
PBANKA_1336400	8502.68	0.6657	0.130525	5.10016	3.39362e-07	7.68348e-07
PBANKA_1211800	2898.4	0.664662	0.168457	3.94559	7.96049e-05	0.000147767
PBANKA_0415300	1962.67	0.663622	0.196967	3.36921	0.00075384	0.00126867
PBANKA_0414300	3302.26	0.663193	0.153938	4.30819	1.64597e-05	3.25304e-05
PBANKA_1234100	2635.8	0.662571	0.161939	4.09148	4.28629e-05	8.15226e-05
PBANKA_0415900	917.063	0.662046	0.225461	2.93642	0.00332029	0.00523064
PBANKA_1453500	2997.12	0.661447	0.168725	3.92028	8.84468e-05	0.000163407
PBANKA_0109300	2871.73	0.660602	0.159725	4.13588	3.53604e-05	6.77078e-05
PBANKA_0616000	1578.22	0.659578	0.189602	3.47875	0.000503767	0.000863189
PBANKA_0824900	2672.1	0.658438	0.161183	4.08504	4.40699e-05	8.36935e-05
PBANKA_1452900	4447.56	0.658071	0.156874	4.1949	2.72987e-05	5.27866e-05
PBANKA_1241000	2761.02	0.658006	0.169672	3.87812	0.000105268	0.000193504
PBANKA_0302200	1453.24	0.657881	0.19939	3.29948	0.000968655	0.00161316
PBANKA_1350200	2929.78	0.657272	0.175208	3.75138	0.000175866	0.000315655
PBANKA_0722000	7574.29	0.656718	0.128922	5.09391	3.5076e-07	7.93097e-07
PBANKA_0515100	598.68	0.656669	0.280454	2.34145	0.0192089	0.0274467
PBANKA_0207100	2587.98	0.655959	0.162728	4.03103	5.55333e-05	0.000104646
PBANKA_1137300	20179	0.653189	0.131621	4.96264	6.9542e-07	1.53898e-06
PBANKA_1451900	1627.53	0.652647	0.214654	3.04046	0.00236216	0.0037915
PBANKA_1413800	1086.41	0.650677	0.219497	2.9644	0.0030327	0.00480877
PBANKA_0934400	5826.21	0.648992	0.143388	4.52612	6.00778e-06	1.23671e-05
PBANKA_0809000	10345.8	0.648819	0.128636	5.04383	4.56298e-07	1.02658e-06
PBANKA_1414900	23368.2	0.648594	0.11398	5.69041	1.26736e-08	3.14588e-08
PBANKA_1213700	4224.07	0.648553	0.160083	4.05136	5.09213e-05	9.62392e-05
PBANKA_0906600	3265.2	0.647274	0.151493	4.27262	1.9319e-05	3.79317e-05
PBANKA_1329500	7720.14	0.646334	0.135884	4.7565	1.96982e-06	4.23968e-06
PBANKA_0304600	814.634	0.646266	0.24073	2.68461	0.00726141	0.0109945
PBANKA_1111900	5399.1	0.646059	0.140597	4.59511	4.32513e-06	9.0272e-06
PBANKA_1219200	17551.7	0.644575	0.142249	4.5313	5.86209e-06	1.20867e-05
PBANKA_0302000	13271.8	0.644453	0.139994	4.60343	4.15596e-06	8.69546e-06
PBANKA_0512600	4346.33	0.642816	0.141852	4.53158	5.85444e-06	1.20758e-05
PBANKA_1315700	5613.17	0.640074	0.137123	4.66789	3.0431e-06	6.43836e-06
PBANKA_1449700	16151.7	0.636766	0.134048	4.75027	2.03145e-06	4.36313e-06
PBANKA_0521200	15837.8	0.636666	0.117689	5.40971	6.31271e-08	1.49495e-07
PBANKA_1212000	5074.03	0.63598	0.146595	4.33835	1.43558e-05	2.8516e-05
PBANKA_1015500	2362.43	0.635542	0.166657	3.81348	0.000137021	0.000248647
PBANKA_0925300	7754.68	0.634987	0.131427	4.83149	1.35517e-06	2.94212e-06
PBANKA_1118000	2770.04	0.63465	0.167941	3.77899	0.000157464	0.000284025
PBANKA_0401700	1537.04	0.634388	0.192906	3.28859	0.00100691	0.00167413
PBANKA_1402900	4063.16	0.633021	0.142825	4.43214	9.33014e-06	1.87966e-05
PBANKA_0412300	3268.67	0.632875	0.164216	3.85391	0.000116247	0.000212842
PBANKA_0917800	3606.08	0.631981	0.153234	4.1243	3.71865e-05	7.10976e-05
PBANKA_1339400	11857.7	0.63165	0.135045	4.67733	2.9063e-06	6.16681e-06
PBANKA_0310500	6119.24	0.631374	0.143929	4.38669	1.15088e-05	2.30673e-05
PBANKA_1227500	6407.94	0.631353	0.130888	4.82363	1.4097e-06	3.05475e-06
PBANKA_0105800	3611.6	0.630745	0.151394	4.16626	3.09639e-05	5.96477e-05
PBANKA_1364300	39253.7	0.630439	0.127682	4.93756	7.91053e-07	1.7438e-06
PBANKA_0924100	21746.1	0.630055	0.113581	5.54719	2.90293e-08	7.03127e-08
PBANKA_0810900	10095	0.627506	0.12721	4.93285	8.10382e-07	1.78564e-06
PBANKA_1327100	3208.3	0.627168	0.161757	3.87721	0.000105659	0.000194083
PBANKA_1453800	1228.78	0.62507	0.202717	3.08347	0.00204605	0.00331646
PBANKA_0505400	8553.84	0.625	0.124968	5.00127	5.69524e-07	1.26862e-06
PBANKA_1016200	4309.06	0.623894	0.152423	4.09318	4.25496e-05	8.0957e-05
PBANKA_1304000	3517.82	0.623795	0.159927	3.9005	9.59939e-05	0.000176966
PBANKA_0832400	4941.43	0.62321	0.160261	3.88872	0.000100772	0.00018544
PBANKA_1246300	1760.51	0.621703	0.21054	2.95289	0.00314816	0.00498255
PBANKA_1143500	2392.87	0.6217	0.176299	3.5264	0.000421256	0.000725711
PBANKA_1203900	1934.63	0.62091	0.211228	2.93952	0.00328723	0.00518016
PBANKA_1406100	5273.85	0.619399	0.148147	4.18097	2.90263e-05	5.60421e-05
PBANKA_0710700	7392.04	0.61865	0.143136	4.32211	1.54543e-05	3.05789e-05
PBANKA_0617000	5435.65	0.616802	0.137641	4.48123	7.42129e-06	1.51062e-05
PBANKA_0905700	1354.55	0.616217	0.237067	2.59933	0.00934055	0.013887
PBANKA_1211900	11749.9	0.613646	0.120158	5.10698	3.27351e-07	7.42141e-07
PBANKA_0209800	1010.76	0.613559	0.252826	2.4268	0.0152326	0.0220743
PBANKA_0615700	8091.21	0.61229	0.129037	4.74506	2.08449e-06	4.46952e-06
PBANKA_1018200	1854.94	0.611774	0.195634	3.12714	0.00176517	0.00287581
PBANKA_0904800	4057.79	0.611468	0.151952	4.02409	5.71955e-05	0.000107539
PBANKA_0829000	2449.56	0.611164	0.166162	3.67813	0.000234949	0.000417007
PBANKA_1456300	5657.03	0.609465	0.135234	4.50676	6.58247e-06	1.3474e-05
PBANKA_0708100	26765.1	0.609165	0.124908	4.87693	1.07751e-06	2.3519e-06
PBANKA_0932100	24042	0.609057	0.13032	4.67355	2.96042e-06	6.27644e-06
PBANKA_0835600	4974.12	0.607704	0.143179	4.24436	2.19214e-05	4.28926e-05
PBANKA_0919900	22574.3	0.606346	0.11899	5.09579	3.47281e-07	7.85928e-07
PBANKA_0925000	11419.5	0.604574	0.124788	4.8448	1.26742e-06	2.75463e-06
PBANKA_1302300	4253.82	0.604259	0.159963	3.7775	0.000158411	0.000285532
PBANKA_0100900	5773.75	0.60407	0.151535	3.98635	6.70986e-05	0.000125301
PBANKA_1429300	2800.91	0.598953	0.166686	3.5933	0.000326521	0.000570601
PBANKA_0610600	4087.7	0.598056	0.148073	4.03892	5.36969e-05	0.000101222
PBANKA_1432400	16090.9	0.597946	0.1272	4.70082	2.59121e-06	5.5166e-06
PBANKA_1223400	5970.61	0.597829	0.156422	3.82191	0.000132422	0.000240729
PBANKA_0602400	2752.15	0.597192	0.165778	3.60236	0.000315339	0.000552574
PBANKA_1461200	4486.12	0.596573	0.145928	4.08813	4.34861e-05	8.26462e-05
PBANKA_1446000	4351	0.596489	0.157572	3.7855	0.000153399	0.000276888
PBANKA_1359600	10971.3	0.595744	0.121646	4.89736	9.71335e-07	2.13201e-06
PBANKA_0310300	13962.5	0.592566	0.122199	4.84918	1.2397e-06	2.69783e-06
PBANKA_0210400	13454.1	0.591323	0.125594	4.70822	2.49885e-06	5.32663e-06
PBANKA_0922200	2617.88	0.591223	0.16031	3.688	0.000226024	0.000402285
PBANKA_1428500	1637.67	0.591072	0.181976	3.24807	0.00116189	0.00192117
PBANKA_1353700	2047.72	0.590838	0.183817	3.21428	0.00130774	0.00215394
PBANKA_1217900	12799.9	0.590793	0.12524	4.71728	2.39023e-06	5.10791e-06
PBANKA_1337500	15005.7	0.590505	0.118665	4.97623	6.48336e-07	1.43665e-06
PBANKA_0411300	17519.5	0.588929	0.124445	4.73243	2.21847e-06	4.74484e-06
PBANKA_1217200	2202.59	0.585838	0.169783	3.45051	0.000559536	0.000954898
PBANKA_0716100	1070.53	0.584358	0.225502	2.59137	0.00955957	0.0141919
PBANKA_1421000	11072.6	0.583519	0.12483	4.6745	2.94664e-06	6.24981e-06
PBANKA_0717300	9831.65	0.582779	0.129536	4.49896	6.82861e-06	1.39498e-05
PBANKA_0306100	2664.2	0.582642	0.165648	3.51736	0.000435866	0.00074936
PBANKA_0518000	5864.98	0.582361	0.139096	4.18675	2.82976e-05	5.46559e-05
PBANKA_0106200	14950.3	0.582161	0.135709	4.28976	1.78865e-05	3.52139e-05
PBANKA_1115400	1642.53	0.581946	0.224948	2.58703	0.00968083	0.0143677
PBANKA_0920600	5481.08	0.578322	0.137064	4.21936	2.44995e-05	4.75721e-05
PBANKA_0720800	1967.89	0.578154	0.172432	3.35295	0.000799547	0.00134205
PBANKA_0918900	2562.93	0.578063	0.162216	3.56354	0.000365891	0.000634617
PBANKA_1133200	13261.3	0.574391	0.121366	4.73271	2.21538e-06	4.74021e-06
PBANKA_0801700	1606.77	0.573522	0.186974	3.06738	0.00215941	0.00348692
PBANKA_1316800	3164.23	0.573268	0.150719	3.80356	0.000142633	0.000258463
PBANKA_1236900	14415.6	0.572557	0.123649	4.63051	3.64773e-06	7.65723e-06
PBANKA_1136300	13597.6	0.572446	0.127531	4.48868	7.16673e-06	1.46106e-05
PBANKA_1013200	13305.4	0.572445	0.125233	4.57105	4.85289e-06	1.00833e-05
PBANKA_1455400	1863.35	0.572407	0.181544	3.153	0.00161602	0.0026392
PBANKA_0702900	10725.3	0.570805	0.126307	4.5192	6.20726e-06	1.2752e-05
PBANKA_1349100	3969.16	0.569438	0.151771	3.75195	0.000175462	0.000315152
PBANKA_0102800	1302.97	0.569376	0.241498	2.35769	0.0183893	0.0263419
PBANKA_1341400	2976.48	0.56771	0.187382	3.02969	0.00244804	0.00392318
PBANKA_1301600	10414	0.565546	0.12706	4.45103	8.54604e-06	1.72784e-05
PBANKA_0211600	2528.4	0.565333	0.177926	3.17734	0.00148631	0.00243548
PBANKA_1316900	3264.26	0.563761	0.156364	3.60544	0.000311623	0.000546251
PBANKA_0206400	781.686	0.5632	0.256763	2.19347	0.0282738	0.0392769
PBANKA_0825200	1394.21	0.562492	0.235389	2.38963	0.0168655	0.0242734
PBANKA_1031000	1362.9	0.562362	0.202488	2.77727	0.00548184	0.00839222
PBANKA_0620200	20152.5	0.562244	0.12467	4.50986	6.48703e-06	1.32893e-05
PBANKA_0102200	4384.38	0.561381	0.141996	3.95351	7.70129e-05	0.000143269
PBANKA_1430600	52433.6	0.560848	0.12644	4.43567	9.1785e-06	1.84984e-05
PBANKA_0912000	5300.54	0.559361	0.167966	3.33019	0.000867852	0.00145192
PBANKA_1013700	4596.89	0.558077	0.138672	4.02443	5.71145e-05	0.000107427
PBANKA_1238900	3205.38	0.55651	0.160304	3.4716	0.000517375	0.000885614
PBANKA_0925800	3350.25	0.556218	0.151455	3.6725	0.000240191	0.00042557
PBANKA_0107200	9886.54	0.556159	0.131868	4.21754	2.46979e-05	4.79391e-05
PBANKA_0713500	3372.1	0.556144	0.149253	3.72617	0.000194409	0.000347714
PBANKA_0921600	9377.98	0.552662	0.149358	3.70025	0.00021539	0.000383759
PBANKA_1460900	684.823	0.552476	0.255629	2.16124	0.0306769	0.042469
PBANKA_0413000	3250.81	0.552401	0.166144	3.32483	0.00088472	0.00147917
PBANKA_0831200	9958.22	0.551732	0.123155	4.47997	7.46539e-06	1.51838e-05
PBANKA_0905600	43198	0.549416	0.127721	4.3017	1.6949e-05	3.34456e-05
PBANKA_0106900	1820.17	0.549405	0.236858	2.31955	0.0203651	0.0289932
PBANKA_0816700	6555.3	0.548715	0.141879	3.86748	0.000109968	0.000201634
PBANKA_1032100	3049	0.547954	0.155315	3.52802	0.000418687	0.000721529
PBANKA_0616400	3377.23	0.547844	0.170492	3.21332	0.0013121	0.00215973
PBANKA_1410200	1882.34	0.547192	0.179274	3.05227	0.00227116	0.00365579
PBANKA_1228500	10848.9	0.545051	0.124355	4.38301	1.1705e-05	2.34422e-05
PBANKA_1354300	19057.5	0.544023	0.128916	4.21997	2.4433e-05	4.74791e-05
PBANKA_1114900	6433.94	0.543557	0.130595	4.16215	3.15267e-05	6.0663e-05
PBANKA_0200400	3387.35	0.542676	0.159312	3.40636	0.000658345	0.00111458
PBANKA_0511300	1605.83	0.542606	0.183311	2.96003	0.00307605	0.00487296
PBANKA_1347800	9032.11	0.542597	0.150906	3.59559	0.00032366	0.000565795
PBANKA_0937000	2262.41	0.541981	0.181394	2.98787	0.00280933	0.00447406
PBANKA_0941800	80824.7	0.541703	0.165069	3.28168	0.00103192	0.0017146
PBANKA_1362200	4646.02	0.54124	0.137627	3.93267	8.40092e-05	0.00015566
PBANKA_0600900	6808.7	0.540445	0.139541	3.87302	0.000107494	0.000197383
PBANKA_1430700	14736.1	0.53914	0.127868	4.21639	2.48245e-05	4.81665e-05
PBANKA_1343600	2212.4	0.538831	0.168959	3.18913	0.00142702	0.00234058
PBANKA_0942400	3823.99	0.537425	0.146913	3.65812	0.000254075	0.000449077
PBANKA_1343500	3700.26	0.537304	0.157727	3.40653	0.000657932	0.00111425
PBANKA_1441300	2053.27	0.536022	0.175979	3.04594	0.00231955	0.00372779
PBANKA_1213100	5108.63	0.535739	0.137326	3.90122	9.57092e-05	0.000176505
PBANKA_0925200	12903.6	0.533775	0.143143	3.72896	0.000192268	0.000344005
PBANKA_0704600	2668.3	0.533572	0.158889	3.35813	0.000784704	0.00131844
PBANKA_1448500	9867.1	0.53354	0.125459	4.25269	2.11213e-05	4.13748e-05
PBANKA_0508100	24894.7	0.53289	0.138352	3.85169	0.000117306	0.000214626
PBANKA_1019000	3380.55	0.53231	0.156647	3.39814	0.000678452	0.00114671
PBANKA_1458900	7809	0.531724	0.151093	3.51919	0.000432869	0.000744459
PBANKA_1302000	3078.14	0.530579	0.16306	3.25389	0.00113835	0.00188469
PBANKA_0612200	4395.09	0.529795	0.158051	3.35205	0.000802154	0.00134598
PBANKA_1425900	3594.95	0.526336	0.146653	3.58898	0.000331974	0.000579534
PBANKA_1110300	22766.8	0.525627	0.116267	4.52085	6.15915e-06	1.26634e-05
PBANKA_1311200	5335.1	0.524953	0.184444	2.84614	0.00442529	0.00685912
PBANKA_1227300	3029.96	0.523062	0.177311	2.94997	0.00317801	0.00502357
PBANKA_1201200	4650.92	0.522683	0.137366	3.80504	0.000141783	0.000257013
PBANKA_1431500	20359.1	0.52206	0.119135	4.38209	1.17548e-05	2.35326e-05
PBANKA_1212600	4173.91	0.521627	0.158458	3.2919	0.000995138	0.0016551
PBANKA_1036400	4162.65	0.521237	0.154077	3.38296	0.000717091	0.00120962
PBANKA_1006100	10451.1	0.52107	0.141558	3.68097	0.000232352	0.000412683
PBANKA_0414700	2779.39	0.520703	0.172535	3.01796	0.00254484	0.00407062
PBANKA_0804300	5623.99	0.52001	0.150577	3.45344	0.000553493	0.000945535
PBANKA_0411950	1915.56	0.518863	0.180454	2.87531	0.00403629	0.00629636
PBANKA_1337600	4784.91	0.517049	0.140454	3.68127	0.000232075	0.000412335
PBANKA_1013800	11564.5	0.516871	0.124484	4.15209	3.29455e-05	6.32499e-05
PBANKA_1331600	3419.85	0.516319	0.157974	3.26837	0.00108168	0.00179436
PBANKA_0933700	9211.68	0.513329	0.126271	4.06529	4.79736e-05	9.09039e-05
PBANKA_1035800	2389.73	0.512811	0.171937	2.98255	0.00285855	0.00454676
PBANKA_1411400	14605.8	0.512608	0.142953	3.58584	0.000335991	0.000585945
PBANKA_1116000	979.547	0.511339	0.218091	2.34462	0.0190466	0.02723
PBANKA_1101500	1890.35	0.506755	0.178883	2.83289	0.00461297	0.00712406
PBANKA_0716000	62081.8	0.505134	0.125756	4.01678	5.89997e-05	0.00011085
PBANKA_1363500	6138.08	0.504745	0.140314	3.59725	0.000321601	0.000562389
PBANKA_1439600	2203.46	0.503716	0.167916	2.9998	0.00270153	0.0043091
PBANKA_1318200	8690.28	0.501631	0.135834	3.69297	0.000221647	0.000394769
PBANKA_0835000	2232.34	0.501489	0.189666	2.64406	0.00819186	0.0122938
PBANKA_1309200	2299.68	0.501188	0.172223	2.91011	0.00361305	0.00565863
PBANKA_0401100	10529.6	0.499516	0.140035	3.56709	0.00036097	0.000627362
PBANKA_1344400	3533.81	0.49926	0.148449	3.36317	0.000770533	0.00129505
PBANKA_0932300	4368.64	0.499177	0.144803	3.44728	0.00056627	0.000965745
PBANKA_0940000	4624.71	0.499161	0.139111	3.58823	0.000332928	0.000581001
PBANKA_0935500	8767.78	0.497883	0.159164	3.12812	0.00175925	0.00286708
PBANKA_0202600	1414.66	0.497834	0.213366	2.33324	0.0196357	0.0280251
PBANKA_0704700	24367.5	0.497114	0.116489	4.26747	1.97703e-05	3.87729e-05
PBANKA_1215900	1844.35	0.496755	0.226358	2.19455	0.0281957	0.0391791
PBANKA_0601000	5216.95	0.496344	0.137957	3.59781	0.000320904	0.000561554
PBANKA_1208900	13648.9	0.493937	0.122646	4.02735	5.64085e-05	0.000106177
PBANKA_1335400	3816.49	0.492797	0.161375	3.05373	0.00226012	0.00363917
PBANKA_0934500	11417.3	0.492534	0.128656	3.82831	0.000129027	0.000234809
PBANKA_0935300	1439.19	0.492111	0.204747	2.4035	0.0162389	0.0234327
PBANKA_0913100	3718.13	0.491646	0.148716	3.30594	0.000946594	0.00157745
PBANKA_0518600	3162.77	0.491425	0.173154	2.83809	0.0045385	0.0070218
PBANKA_0936800	10118.9	0.490763	0.12953	3.78879	0.00015138	0.000273688
PBANKA_0823600	26017.6	0.490587	0.123804	3.96261	7.41361e-05	0.000138169
PBANKA_1234900	14029.8	0.490365	0.122163	4.01402	5.9693e-05	0.00011207
PBANKA_1037500	12861.6	0.49032	0.119392	4.10679	4.01194e-05	7.65042e-05
PBANKA_0213200	12399.2	0.48979	0.143296	3.41802	0.00063078	0.00107075
PBANKA_0512300	1864.77	0.489603	0.174792	2.80105	0.00509363	0.00782138
PBANKA_1224100	2316.37	0.488113	0.168208	2.90185	0.00370967	0.00580283
PBANKA_1127500	2554	0.487492	0.190436	2.55987	0.0104712	0.0154464
PBANKA_0711200	22452	0.487222	0.158806	3.06804	0.00215471	0.00348042
PBANKA_1434300	1790.15	0.485885	0.185777	2.61543	0.00891157	0.0133035
PBANKA_0816600	3195.14	0.484842	0.178655	2.71384	0.00665081	0.0101082
PBANKA_1228100	25785.1	0.484299	0.127199	3.80742	0.000140426	0.000254645
PBANKA_1451700	2064.35	0.48395	0.191067	2.53288	0.0113128	0.016611
PBANKA_1037100	7272.9	0.483634	0.136148	3.55226	0.000381937	0.000660876
PBANKA_1416000	1513.02	0.483086	0.207312	2.33024	0.0197935	0.0282266
PBANKA_0819400	6340.86	0.48077	0.129688	3.70711	0.000209635	0.000373898
PBANKA_1110100	8069.09	0.479677	0.138515	3.46299	0.000534212	0.000913514
PBANKA_0907200	9310.04	0.476837	0.125841	3.78919	0.000151139	0.000273487
PBANKA_1110700	8528	0.476338	0.124089	3.83869	0.000123692	0.000225743
PBANKA_1034800	2572.48	0.476334	0.158234	3.01032	0.0026097	0.00416784
PBANKA_1002000	26594.9	0.476032	0.146707	3.24478	0.00117541	0.00194164
PBANKA_1360000	5761.57	0.475254	0.133226	3.56727	0.000360721	0.000627142
PBANKA_1313800	4537.97	0.474486	0.141908	3.34361	0.000826972	0.0013858
PBANKA_0112100	7258.36	0.474001	0.13111	3.61529	0.000300006	0.000526792
PBANKA_0303800	10506.2	0.472679	0.133952	3.52872	0.000417569	0.000719845
PBANKA_1360900	6045.34	0.472676	0.136457	3.46391	0.00053239	0.000910705
PBANKA_0619800	2732.52	0.470387	0.159413	2.95074	0.00317014	0.00501268
PBANKA_1132700	2762.16	0.469753	0.189233	2.4824	0.0130501	0.0190413
PBANKA_0705500	6223.05	0.469733	0.13721	3.42347	0.000618263	0.0010502
PBANKA_0407500	1834.63	0.469635	0.182951	2.567	0.0102583	0.0151587
PBANKA_0942300	2319.43	0.468511	0.163509	2.86536	0.00416541	0.0064839
PBANKA_0510000	8736.55	0.467628	0.129147	3.62089	0.000293596	0.000516247
PBANKA_1108300	19597.1	0.467523	0.148281	3.15295	0.00161632	0.0026392
PBANKA_0930200	3168.02	0.467497	0.150445	3.10743	0.00188721	0.00306679
PBANKA_1108200	2614.13	0.467013	0.204348	2.28538	0.0222904	0.0316106
PBANKA_0103400	7733.19	0.466407	0.1277	3.65237	0.000259836	0.000458942
PBANKA_0811800	5081.98	0.465335	0.147049	3.16448	0.0015536	0.00254223
PBANKA_1324900	2836.13	0.464556	0.161885	2.86967	0.00410906	0.00640009
PBANKA_1214100	5824.68	0.464533	0.148391	3.13047	0.00174529	0.00284524
PBANKA_0204400	10630.9	0.462541	0.141722	3.26373	0.00109957	0.00182345
PBANKA_0208900	1499.37	0.461635	0.197755	2.33437	0.0195762	0.0279559
PBANKA_0815300	2775.85	0.46125	0.215211	2.14324	0.0320936	0.0442458
PBANKA_0520700	22046.8	0.45936	0.120177	3.82237	0.000132176	0.000240368
PBANKA_1219600	1638.27	0.459192	0.214052	2.14524	0.031934	0.0440495
PBANKA_1105800	2288.09	0.458919	0.171508	2.67579	0.00745525	0.0112613
PBANKA_0507000	3456.58	0.458746	0.17233	2.66202	0.00776722	0.0117048
PBANKA_0602000	18881.1	0.458184	0.117671	3.89379	9.86921e-05	0.000181743
PBANKA_0920400	5049.11	0.457103	0.140634	3.25029	0.00115286	0.00190808
PBANKA_0716600	4724.65	0.456218	0.14843	3.07363	0.00211471	0.00341906
PBANKA_1237200	13145.4	0.45621	0.133774	3.4103	0.000648908	0.00110006
PBANKA_0301500	2636.98	0.456203	0.177736	2.56675	0.0102656	0.0151607
PBANKA_0913000	5315.69	0.455652	0.134116	3.39744	0.000680191	0.00114927
PBANKA_1322800	3273.79	0.455318	0.160456	2.83766	0.00454461	0.00702913
PBANKA_1035000	4371.79	0.454558	0.160109	2.83906	0.00452466	0.00700421
PBANKA_0108100	3837.51	0.453461	0.146867	3.08757	0.002018	0.00327308
PBANKA_0602100	5323.76	0.453272	0.152843	2.96561	0.00302081	0.00479141
PBANKA_0406000	21340.9	0.453214	0.124658	3.63565	0.000277281	0.000488571
PBANKA_0702300	3596.23	0.451035	0.165913	2.7185	0.00655786	0.00997366
PBANKA_0942700	14879.1	0.449051	0.124817	3.59767	0.000321079	0.000561669
PBANKA_1021900	2257.48	0.447571	0.175157	2.55526	0.0106109	0.0156298
PBANKA_1229600	2152.63	0.446921	0.167254	2.67212	0.00753745	0.0113753
PBANKA_0505200	16056.4	0.446247	0.121909	3.66049	0.000251736	0.000445096
PBANKA_0720400	52372.8	0.44585	0.126828	3.51538	0.00043913	0.000754717
PBANKA_0926600	7535.46	0.445829	0.142917	3.11949	0.00181166	0.00294777
PBANKA_1022500	2285.7	0.445171	0.17167	2.59318	0.00950925	0.0141254
PBANKA_0401400	5440.38	0.445019	0.154875	2.8734	0.00406079	0.00633072
PBANKA_1013000	9905.94	0.442734	0.132177	3.34956	0.000809414	0.00135772
PBANKA_0507300	12826.4	0.4421	0.121495	3.63882	0.000273889	0.000482927
PBANKA_1416400	3219.79	0.441587	0.150126	2.94143	0.003267	0.00515401
PBANKA_1130100	2713.03	0.441076	0.157294	2.80415	0.00504493	0.00774893
PBANKA_0522000	3010.35	0.4401	0.175988	2.50073	0.0123937	0.0181251
PBANKA_1317800	3674.1	0.439971	0.172633	2.5486	0.0108157	0.0159086
PBANKA_0202400	4336.31	0.439712	0.145887	3.01406	0.0025778	0.00412077
PBANKA_1332500	1970.04	0.439665	0.172798	2.54438	0.0109471	0.0160925
PBANKA_1123100	3682.96	0.437763	0.154493	2.83354	0.00460357	0.0071121
PBANKA_1436200	9071.8	0.435889	0.123675	3.52448	0.000424313	0.000730729
PBANKA_1325700	2727.16	0.434429	0.158868	2.73453	0.00624691	0.00951209
PBANKA_1351300	12515.5	0.434261	0.142564	3.04608	0.0023185	0.00372728
PBANKA_0908700	2464.1	0.43363	0.167842	2.58355	0.00977886	0.0144922
PBANKA_1215800	2715.83	0.432593	0.164301	2.63293	0.00846522	0.012678
PBANKA_1103900	8858.72	0.43255	0.140147	3.0864	0.00202596	0.00328494
PBANKA_1446700	2579.3	0.431079	0.166779	2.58473	0.00974548	0.0144469
PBANKA_1323400	15209.8	0.430088	0.125416	3.42929	0.000605173	0.00102934
PBANKA_0301300	140122	0.429841	0.145746	2.94924	0.00318553	0.00503232
PBANKA_1022300	6497.06	0.429591	0.139741	3.07419	0.00211074	0.00341372
PBANKA_1142600	1680.11	0.428787	0.19436	2.20615	0.0273735	0.0381197
PBANKA_1327700	2361.23	0.428757	0.169412	2.53085	0.0113785	0.0167027
PBANKA_1458500	2599.18	0.428209	0.161421	2.65275	0.00798393	0.0120065
PBANKA_1432800	1977.22	0.428131	0.199326	2.14789	0.0317227	0.0437818
PBANKA_0402800	2135.98	0.427404	0.19345	2.20937	0.0271488	0.0378274
PBANKA_0306000	5832.13	0.426384	0.138509	3.07838	0.00208133	0.00336829
PBANKA_0924000	5432.54	0.424831	0.140148	3.0313	0.00243502	0.00390354
PBANKA_0709700	2319.2	0.424532	0.172854	2.45602	0.0140487	0.0204574
PBANKA_1406900	8881.88	0.42434	0.134172	3.16266	0.00156335	0.00255679
PBANKA_1420500	7602.22	0.423827	0.128727	3.29245	0.000993191	0.0016524
PBANKA_1442200	41991.4	0.422868	0.151896	2.78393	0.00537046	0.00823158
PBANKA_0107900	6147.97	0.422516	0.138246	3.05627	0.00224111	0.00361084
PBANKA_1225700	6055.04	0.422007	0.14588	2.89284	0.00381774	0.00596456
PBANKA_1327000	2517.64	0.421971	0.163339	2.5834	0.00978314	0.0144943
PBANKA_1359200	16241.1	0.421898	0.140415	3.00465	0.00265882	0.00424231
PBANKA_1143100	3752.71	0.421614	0.159067	2.65055	0.00803608	0.0120778
PBANKA_0517500	11457	0.421106	0.134968	3.12005	0.00180821	0.00294311
PBANKA_0912900	1936.27	0.420716	0.177552	2.36953	0.0178105	0.025556
PBANKA_1235900	1996.13	0.418042	0.183838	2.27398	0.0229674	0.0324265
PBANKA_0941900	43185.2	0.417057	0.1439	2.89824	0.00375265	0.00586646
PBANKA_1013600	2826.94	0.416616	0.162121	2.56978	0.0101764	0.015042
PBANKA_1134300	1867.01	0.416209	0.18036	2.30765	0.0210184	0.0298899
PBANKA_1438900	1616.68	0.415925	0.183109	2.27146	0.0231189	0.0326043
PBANKA_0904400	1832.26	0.415056	0.191959	2.16221	0.0306017	0.0423952
PBANKA_0201900	14981.7	0.413704	0.137985	2.99817	0.00271602	0.00433086
PBANKA_0110200	8385.62	0.41163	0.133192	3.09051	0.00199813	0.00324291
PBANKA_1028600	3448.19	0.410554	0.176084	2.33158	0.019723	0.028134
PBANKA_0616500	6352.05	0.403437	0.130293	3.09638	0.00195902	0.00318145
PBANKA_1117100	18329.5	0.402599	0.121388	3.31662	0.000911143	0.00152036
PBANKA_0937100	2678.4	0.402006	0.173014	2.32354	0.0201499	0.0287028
PBANKA_0716500	34243	0.401116	0.119137	3.36684	0.000760344	0.00127877
PBANKA_0622100	4325.13	0.400453	0.140507	2.85005	0.00437121	0.00677942
PBANKA_1231500	9163.8	0.399085	0.134299	2.97162	0.00296231	0.004703
PBANKA_1358300	23291.8	0.398077	0.148544	2.67985	0.00736543	0.0111414
PBANKA_0104200	1665.33	0.396368	0.189463	2.09206	0.0364335	0.0498784
PBANKA_0108400	2672.6	0.396149	0.179378	2.20846	0.027212	0.0379051
PBANKA_0205100	9346.01	0.394435	0.12302	3.20628	0.00134463	0.00221114
PBANKA_1144600	4433.31	0.393049	0.152296	2.58082	0.00985654	0.0145988
PBANKA_0607300	4607.23	0.392996	0.14889	2.6395	0.00830289	0.0124385
PBANKA_1009100	19768.8	0.392987	0.135081	2.90928	0.00362261	0.00567187
PBANKA_1306600	6179.79	0.392815	0.138185	2.84266	0.00447383	0.00693015
PBANKA_1238200	13277	0.392329	0.164202	2.38931	0.0168798	0.0242734
PBANKA_1434800	11980	0.392054	0.133994	2.9259	0.00343456	0.00539399
PBANKA_1434500	1602.49	0.391994	0.183198	2.13973	0.0323768	0.0446121
PBANKA_1356400	11344.7	0.388767	0.138064	2.81584	0.00486495	0.00747924
PBANKA_1435300	2795.2	0.388673	0.171854	2.26165	0.0237189	0.0334042
PBANKA_0404300	8399.15	0.386217	0.134446	2.87265	0.00407046	0.00634386
PBANKA_1351700	25209.7	0.382715	0.123145	3.10785	0.00188454	0.00306344
PBANKA_1308700	3936.17	0.381977	0.142239	2.68546	0.00724295	0.0109731
PBANKA_1200800	54697.4	0.381169	0.129015	2.95446	0.00313214	0.00495873
PBANKA_0821000	4139.72	0.379783	0.148732	2.55347	0.0106655	0.0157013
PBANKA_1417900	42697.7	0.378728	0.125197	3.02505	0.00248595	0.00397892
PBANKA_1434900	4679.37	0.378655	0.154955	2.44364	0.0145398	0.0211303
PBANKA_1462000	4489.13	0.378208	0.145818	2.59369	0.00949512	0.0141085
PBANKA_0622300	3086.51	0.377739	0.169578	2.22752	0.0259123	0.0362431
PBANKA_0505800	13997.1	0.377088	0.117497	3.20934	0.00133039	0.00218843
PBANKA_0834600	9733.21	0.376001	0.130253	2.8867	0.00389308	0.0060804
PBANKA_1035700	3927.9	0.374735	0.163982	2.28522	0.0222999	0.0316152
PBANKA_1451500	4706.02	0.374486	0.163301	2.29323	0.0218345	0.0309986
PBANKA_1114700	2645.68	0.374345	0.163485	2.28978	0.0220343	0.0312735
PBANKA_1443000	12127.1	0.372942	0.14387	2.59222	0.00953577	0.0141607
PBANKA_1357100	2156.71	0.370679	0.172602	2.1476	0.0317454	0.0438013
PBANKA_1104500	19133.1	0.369726	0.167072	2.21298	0.0268993	0.0375207
PBANKA_1418800	18369.6	0.369643	0.129385	2.85691	0.00427781	0.00665075
PBANKA_0827800	3827.71	0.367822	0.16343	2.25064	0.0244082	0.0342992
PBANKA_0415600	3459	0.367149	0.1503	2.44278	0.0145744	0.0211747
PBANKA_0917400	6474.71	0.366892	0.154452	2.37545	0.0175276	0.0251783
PBANKA_1137500	5464.27	0.365944	0.13842	2.64372	0.00819999	0.0122988
PBANKA_1314700	3536.83	0.364256	0.159437	2.28465	0.0223336	0.0316543
PBANKA_0800800	2483.35	0.364009	0.160182	2.27247	0.0230582	0.0325366
PBANKA_0511200	6758.44	0.363784	0.144889	2.51077	0.0120468	0.017638
PBANKA_0810500	38863.6	0.362373	0.156788	2.31123	0.0208199	0.0296241
PBANKA_0311900	5846.41	0.362115	0.138516	2.61425	0.00894233	0.0133455
PBANKA_0109700	7518.62	0.361321	0.13607	2.6554	0.00792145	0.0119231
PBANKA_0705900	14327.8	0.360513	0.117808	3.06016	0.00221219	0.00356649
PBANKA_1018400	2709.01	0.360459	0.158047	2.2807	0.0225659	0.0319215
PBANKA_0606600	2744.88	0.360332	0.166677	2.16185	0.0306298	0.0424226
PBANKA_1245900	5020.05	0.359071	0.148799	2.41313	0.0158162	0.0228551
PBANKA_1220500	4683.81	0.3588	0.14329	2.50401	0.0122796	0.0179685
PBANKA_1001600	6609.31	0.358591	0.129684	2.76512	0.00569021	0.00870077
PBANKA_0906700	2959.08	0.35828	0.160098	2.23788	0.0252292	0.0353555
PBANKA_1458300	17600.8	0.358223	0.120614	2.96999	0.00297808	0.00472656
PBANKA_1359000	48247.5	0.35786	0.118133	3.0293	0.0024512	0.003927
PBANKA_1218600	4149.58	0.357495	0.154028	2.32098	0.0202882	0.0288917
PBANKA_0711000	5086.09	0.356594	0.14278	2.4975	0.0125073	0.0182808
PBANKA_0712300	5295.97	0.355609	0.141143	2.51949	0.0117523	0.0172168
PBANKA_1228000	4441.28	0.352381	0.145078	2.42891	0.0151445	0.0219591
PBANKA_0409500	3374.9	0.349113	0.155335	2.24748	0.0246096	0.0345583
PBANKA_0314900	3357.59	0.348119	0.151227	2.30196	0.0213373	0.030318
PBANKA_1358000	7638.93	0.343068	0.134258	2.5553	0.0106098	0.0156298
PBANKA_0214500	9658.21	0.342991	0.143557	2.38924	0.0168834	0.0242734
PBANKA_1003500	4345.18	0.341994	0.151327	2.25997	0.0238232	0.0335327
PBANKA_0619200	33799.8	0.340439	0.115479	2.94807	0.00319766	0.00504992
PBANKA_0802300	39859	0.339893	0.124205	2.73654	0.00620895	0.00945711
PBANKA_0615800	12816.7	0.337998	0.118356	2.85577	0.00429323	0.00667066
PBANKA_1358900	7328.32	0.337205	0.132633	2.54239	0.0110098	0.0161801
PBANKA_0716700	10513	0.336681	0.146123	2.3041	0.021217	0.0301554
PBANKA_1322700	4776.74	0.336257	0.145729	2.30741	0.0210321	0.029901
PBANKA_0111500	4057.77	0.332558	0.153517	2.16626	0.0302911	0.0420106
PBANKA_0601100	24987.1	0.331734	0.118639	2.79615	0.0051715	0.00792902
PBANKA_0928200	22861.9	0.327756	0.131423	2.49391	0.0126345	0.0184561
PBANKA_0906900	10735.8	0.326586	0.12784	2.55463	0.0106299	0.0156534
PBANKA_1439200	49099.7	0.324636	0.143366	2.26439	0.0235502	0.0331758
PBANKA_0102600	13055.9	0.323946	0.120146	2.69628	0.00701191	0.0106357
PBANKA_1345800	4788.57	0.322833	0.148037	2.18076	0.029201	0.0405098
PBANKA_1139500	4620.59	0.322373	0.141041	2.28567	0.0222734	0.0315953
PBANKA_0105000	9300.86	0.321024	0.138663	2.31513	0.0206056	0.0293274
PBANKA_0908900	17491.9	0.321021	0.119742	2.68093	0.00734183	0.0111097
PBANKA_1457900	6111.72	0.318923	0.149819	2.12871	0.0332779	0.0457795
PBANKA_0610100	7736.03	0.31716	0.133412	2.3773	0.0174399	0.0250594
PBANKA_1427200	21361.3	0.313655	0.134402	2.33371	0.0196111	0.0279979
PBANKA_0909600	8928.47	0.311679	0.147731	2.10977	0.0348783	0.0478907
PBANKA_1446100	8199.4	0.308948	0.126944	2.43374	0.0149438	0.0216865
PBANKA_1108000.2	29515.9	0.302274	0.114114	2.64888	0.00807601	0.0121307
PBANKA_0719100	6352.62	0.299465	0.142053	2.10813	0.0350201	0.0480686
PBANKA_0607800	6392.37	0.296628	0.132069	2.24601	0.0247036	0.0346666
PBANKA_1335700	12995.4	0.294772	0.11822	2.49342	0.0126519	0.0184762
PBANKA_0408400	13767.3	0.291993	0.119257	2.44843	0.0143479	0.0208574
PBANKA_1232800	5208.28	0.291963	0.139466	2.09342	0.0363113	0.0497245
PBANKA_1243900	23760.5	0.291106	0.130761	2.22624	0.0259979	0.0363467
PBANKA_1011100	5275.67	0.290614	0.138147	2.10366	0.0354079	0.0485396
PBANKA_0818000	9288.75	0.2893	0.12689	2.27992	0.0226123	0.0319781
PBANKA_0522600	11157.1	0.280724	0.131048	2.14214	0.0321824	0.0443562
PBANKA_1356500	9534.16	0.279859	0.124524	2.24742	0.0246129	0.0345583
PBANKA_1333000	8027.08	0.276369	0.125399	2.20392	0.0275303	0.0383066
PBANKA_0405800	6786.12	0.274953	0.13068	2.10402	0.0353764	0.0485094
PBANKA_1445800	17078.1	0.268692	0.125583	2.13955	0.0323911	0.0446197
PBANKA_1038800	22474.2	0.266125	0.117122	2.27219	0.0230748	0.032551
PBANKA_1209900	12023.8	0.259765	0.120645	2.15313	0.0313081	0.0432569
PBANKA_1358200	19931.9	0.256684	0.113944	2.25273	0.0242763	0.0341233
PBANKA_0101400	13926.7	-0.254725	0.120413	-2.11544	0.0343928	0.0472369
PBANKA_1117500	52927	-0.257683	0.113159	-2.27717	0.0227761	0.0321741
PBANKA_1358800	15326	-0.270252	0.125516	-2.15313	0.0313085	0.0432569
PBANKA_0931300	17406	-0.275465	0.121045	-2.27573	0.0228621	0.0322867
PBANKA_0109200	12817	-0.275705	0.125031	-2.20509	0.0274479	0.0382128
PBANKA_0307100	16976.9	-0.285554	0.127436	-2.24076	0.0250415	0.0351119
PBANKA_0715400	10443.8	-0.286024	0.132421	-2.15996	0.0307761	0.0425791
PBANKA_0916100	16213.7	-0.288798	0.120036	-2.40593	0.0161316	0.0232844
PBANKA_0206100	6240.6	-0.289871	0.131792	-2.19945	0.0278456	0.0387137
PBANKA_1125500	7900.77	-0.301343	0.129339	-2.32986	0.0198133	0.0282391
PBANKA_0618200	11277.4	-0.303473	0.136868	-2.21727	0.0266046	0.0371502
PBANKA_1107600	5319.54	-0.304751	0.142756	-2.13477	0.03278	0.0451434
PBANKA_1033000	5051.56	-0.305539	0.145576	-2.09882	0.0358326	0.0491085
PBANKA_1210900	13401.1	-0.307647	0.14287	-2.15333	0.0312924	0.0432569
PBANKA_1305900	10317.1	-0.307765	0.137211	-2.24301	0.0248961	0.0349271
PBANKA_1131600	11356	-0.308841	0.144834	-2.13238	0.0329754	0.0453879
PBANKA_1142900	34267.9	-0.310074	0.120484	-2.57358	0.0100652	0.0148819
PBANKA_1448200	12213.4	-0.310096	0.129729	-2.39034	0.0168329	0.024235
PBANKA_0404700	58447.6	-0.311362	0.116221	-2.67906	0.00738297	0.011162
PBANKA_0907800	5172.5	-0.311708	0.140313	-2.22151	0.0263162	0.0367677
PBANKA_0212900	5801.1	-0.311876	0.136532	-2.28426	0.0223561	0.0316773
PBANKA_0704500	14805	-0.312647	0.135479	-2.30772	0.0210145	0.0298899
PBANKA_1123500	22228.6	-0.314353	0.126129	-2.49232	0.012691	0.018528
PBANKA_1424200	13989.6	-0.315862	0.132098	-2.39112	0.0167972	0.0241904
PBANKA_1131900	4312.42	-0.316344	0.146374	-2.1612	0.03068	0.042469
PBANKA_1343100	3994.45	-0.318866	0.142258	-2.24146	0.024996	0.0350577
PBANKA_1429700	9084.88	-0.320258	0.135216	-2.3685	0.0178606	0.0256206
PBANKA_0826900	7411.87	-0.322829	0.130686	-2.47027	0.0135013	0.0196771
PBANKA_1018900	6144.84	-0.323827	0.15451	-2.09582	0.0360977	0.0494586
PBANKA_0814000	6199.34	-0.324073	0.145075	-2.23383	0.0254942	0.0357073
PBANKA_1123000	3498.22	-0.324384	0.153182	-2.11763	0.0342063	0.0470061
PBANKA_1122800	5005.93	-0.32593	0.150701	-2.16276	0.0305595	0.0423598
PBANKA_0407900	5527.73	-0.327809	0.137191	-2.38944	0.0168742	0.0242734
PBANKA_1241700	7673.06	-0.327996	0.132817	-2.46953	0.013529	0.0197119
PBANKA_1356300	11908.1	-0.328791	0.132421	-2.48293	0.0130309	0.0190187
PBANKA_0936900	13837.9	-0.329663	0.124451	-2.64894	0.00807457	0.0121307
PBANKA_0402300	6178.62	-0.329883	0.134584	-2.45113	0.0142407	0.0207074
PBANKA_0719600	5266.56	-0.331732	0.152118	-2.18076	0.029201	0.0405098
PBANKA_1003300	6643.38	-0.331763	0.131571	-2.52156	0.0116836	0.0171259
PBANKA_0405100	11556.3	-0.332604	0.137165	-2.42484	0.015315	0.0221747
PBANKA_1233000	5502	-0.335175	0.14195	-2.36121	0.0182152	0.0261072
PBANKA_0105600	8371.95	-0.339954	0.153726	-2.21143	0.0270063	0.0376597
PBANKA_1459700	4009.83	-0.340501	0.157807	-2.1577	0.0309514	0.0428099
PBANKA_1209000	10490.1	-0.340633	0.149195	-2.28313	0.0224226	0.0317539
PBANKA_0804700	4423.56	-0.341163	0.140924	-2.42091	0.0154818	0.0223972
PBANKA_1108900	8233.36	-0.341318	0.153319	-2.2262	0.0260006	0.0363467
PBANKA_0926400	2904.23	-0.341524	0.156463	-2.18279	0.0290515	0.0403242
PBANKA_1008100	4165.02	-0.341756	0.144111	-2.37148	0.0177171	0.0254291
PBANKA_0601600	35108	-0.344922	0.133393	-2.58576	0.00971651	0.014413
PBANKA_1201500	7617.87	-0.345633	0.129247	-2.67421	0.00749048	0.0113111
PBANKA_1432200	72191.9	-0.345936	0.125512	-2.7562	0.00584766	0.00893349
PBANKA_1225000	12774.4	-0.346072	0.130928	-2.64323	0.00821195	0.0123131
PBANKA_0831300	3304.3	-0.347626	0.156845	-2.21637	0.0266659	0.0372257
PBANKA_1334500	2717.02	-0.347755	0.157336	-2.21028	0.027086	0.0377502
PBANKA_1031200	5924.08	-0.34925	0.165744	-2.10716	0.0351034	0.048148
PBANKA_1438000	17349.6	-0.349495	0.133489	-2.61815	0.00884069	0.0132092
PBANKA_0802100	5068.27	-0.352921	0.142503	-2.47659	0.0132646	0.0193433
PBANKA_1330300	3706.22	-0.354118	0.149161	-2.37407	0.0175933	0.0252657
PBANKA_0811700	6513.32	-0.355052	0.152522	-2.32787	0.0199191	0.028382
PBANKA_1337100	17679.5	-0.35534	0.152351	-2.33238	0.0196807	0.0280815
PBANKA_0706900	3965.72	-0.355467	0.145559	-2.44208	0.0146029	0.02121
PBANKA_0705400	3556.7	-0.356582	0.148748	-2.39722	0.0165198	0.0238178
PBANKA_0919800	13368.3	-0.356612	0.122436	-2.91263	0.00358394	0.00561477
PBANKA_0825600	2992.18	-0.357063	0.159823	-2.23412	0.0254751	0.0356904
PBANKA_1429400	7412.54	-0.358453	0.129753	-2.76258	0.00573468	0.00876613
PBANKA_1117900	3193.08	-0.360759	0.163006	-2.21317	0.026886	0.0375124
PBANKA_1454600	4835.57	-0.361105	0.158309	-2.28102	0.0225476	0.0319132
PBANKA_1451400	3595.23	-0.361751	0.146332	-2.47213	0.0134311	0.0195804
PBANKA_0404400	8258.95	-0.363219	0.142555	-2.54793	0.0108364	0.0159345
PBANKA_1437200	6418.5	-0.363768	0.132363	-2.74825	0.00599138	0.00914756
PBANKA_0804100	18229.6	-0.363916	0.137089	-2.65459	0.00794048	0.0119482
PBANKA_1202100	8960.62	-0.364247	0.123422	-2.95123	0.00316514	0.00500632
PBANKA_1363000	5079.84	-0.364962	0.151456	-2.40969	0.0159661	0.0230521
PBANKA_0307300	3968.25	-0.365388	0.166359	-2.19638	0.0280649	0.039008
PBANKA_0404600	7026.9	-0.366193	0.14272	-2.56582	0.0102933	0.0151956
PBANKA_0805300	2289.86	-0.367777	0.173797	-2.11613	0.034334	0.0471688
PBANKA_0404100	7558.98	-0.369174	0.141	-2.61826	0.00883805	0.0132092
PBANKA_1130700	2409.84	-0.369447	0.16784	-2.20119	0.0277225	0.0385531
PBANKA_0103900	9719.91	-0.369689	0.126051	-2.93286	0.00335861	0.00528447
PBANKA_1305600	2471.81	-0.370972	0.171549	-2.16248	0.0305812	0.0423784
PBANKA_1335800	5054.81	-0.371454	0.139357	-2.66549	0.00768772	0.0115952
PBANKA_0919100	17544.4	-0.372872	0.144874	-2.57377	0.0100596	0.014878
PBANKA_1405100	4617.83	-0.374657	0.142859	-2.62257	0.00872684	0.0130506
PBANKA_1241800	24942.5	-0.376589	0.124415	-3.02689	0.00247084	0.00395598
PBANKA_0516600	6085.42	-0.377741	0.131602	-2.87033	0.00410042	0.00638859
PBANKA_1417300	8966.39	-0.378774	0.139207	-2.72095	0.00650955	0.00990314
PBANKA_0208800	15064	-0.380669	0.1239	-3.07239	0.00212354	0.00343225
PBANKA_0821900	6688.31	-0.38082	0.140498	-2.71049	0.0067183	0.0101994
PBANKA_1140100	3801.34	-0.381575	0.167907	-2.27254	0.023054	0.0325366
PBANKA_0312500	7432.35	-0.38362	0.127321	-3.013	0.00258676	0.00413249
PBANKA_0930400	4796.09	-0.383996	0.152348	-2.52052	0.0117182	0.0171717
PBANKA_0417300	10016.2	-0.384068	0.130213	-2.94953	0.00318253	0.00502914
PBANKA_0926100	3979.62	-0.384124	0.155614	-2.46844	0.0135704	0.0197665
PBANKA_1354400	63749.8	-0.384687	0.126829	-3.03312	0.00242043	0.00388258
PBANKA_1124600	2968.55	-0.385383	0.17075	-2.25701	0.0240076	0.0337735
PBANKA_1025100	8577.14	-0.385835	0.149218	-2.58571	0.00971777	0.014413
PBANKA_0621700	2193.87	-0.385852	0.170675	-2.26074	0.0237751	0.0334741
PBANKA_1444900	3718.93	-0.386057	0.144471	-2.67221	0.00753544	0.0113753
PBANKA_0928400	2580.69	-0.387246	0.181732	-2.13086	0.0331008	0.0455482
PBANKA_1417100	4148.57	-0.388499	0.146702	-2.64823	0.0080915	0.0121503
PBANKA_0715900	8627.66	-0.389161	0.124625	-3.12267	0.00179221	0.00291799
PBANKA_1413400	10624.7	-0.389516	0.121135	-3.21555	0.00130197	0.00214513
PBANKA_1436100	2776.55	-0.390334	0.185164	-2.10805	0.0350267	0.0480686
PBANKA_1120900	3485.1	-0.390696	0.177465	-2.20153	0.0276982	0.0385298
PBANKA_0916400	11259.9	-0.390794	0.128177	-3.04885	0.0022972	0.0036942
PBANKA_1221300	3827.33	-0.392132	0.161493	-2.42817	0.0151753	0.0219975
PBANKA_0902200	7886.06	-0.392489	0.15685	-2.50233	0.012338	0.0180487
PBANKA_0313800	24246.7	-0.392786	0.126014	-3.11701	0.00182697	0.00297174
PBANKA_1427800	7034.45	-0.393131	0.140114	-2.80579	0.0050193	0.00771188
PBANKA_1321200	6549.06	-0.393498	0.131811	-2.98533	0.00283276	0.00450715
PBANKA_0206500	19586.7	-0.393635	0.133827	-2.94137	0.00326761	0.00515401
PBANKA_0834400	11799.5	-0.39365	0.124028	-3.17388	0.00150414	0.00246391
PBANKA_1138300	5106.59	-0.397219	0.150449	-2.64023	0.00828507	0.0124154
PBANKA_1104900	2371.12	-0.398219	0.185643	-2.14508	0.0319467	0.0440552
PBANKA_1215500	14270.9	-0.398944	0.122253	-3.26327	0.00110136	0.00182581
PBANKA_1457400	4030.37	-0.399048	0.14355	-2.77985	0.00543848	0.00833084
PBANKA_1037300	5672.24	-0.399772	0.134286	-2.97701	0.00291075	0.00462547
PBANKA_1111000	9535.44	-0.400164	0.126126	-3.17274	0.00151009	0.00247207
PBANKA_1442500	1545.31	-0.400994	0.190237	-2.10787	0.0350425	0.0480774
PBANKA_1306000	43965.2	-0.401369	0.118325	-3.39209	0.000693611	0.00117078
PBANKA_0104700	18326.8	-0.401769	0.129894	-3.09305	0.00198108	0.00321626
PBANKA_1455900	3149.46	-0.401974	0.153958	-2.61093	0.00902966	0.013464
PBANKA_1027300	8243.24	-0.404499	0.141695	-2.85472	0.00430742	0.0066866
PBANKA_0933300	4806.52	-0.40552	0.145838	-2.78062	0.00542545	0.00831337
[truncated: 1,727 more rows]
